# Supplementary material for: Exploring Leishmania major Inositol Phosphorylceramide Synthase (LmjIPCS): Insights into the ceramide binding domain
Source: Royal Society of Chemistry journal article supplement (doi:10.1039/c0ob00871k), 2011-01-01
Supplement: c0ob00871k.pdf [file c0ob00871k.pdf]

## Exploring *Leishmania major* Inositol Phosphorylceramide Synthase (*Lmj*IPCS): Insights into the ceramide binding domain

### ELECTRONIC SUPPLEMENTARY INFORMATION

#### TABLE OF CONTENTS

|                                                                       |    |
|-----------------------------------------------------------------------|----|
| Electronic Supplementary Information .....                            | 1  |
| Table of Contents .....                                               | 1  |
| Chemistry Experimental .....                                          | 2  |
| General Considerations .....                                          | 2  |
| Compound Numbering System .....                                       | 2  |
| Spectroscopic Data .....                                              | 2  |
| Mass Spectrometry .....                                               | 2  |
| Experimental Procedures .....                                         | 3  |
| Synthesis of Intermediate compounds .....                             | 3  |
| General Procedure for Phase Transfer Catalysis <sup>9, 13</sup> ..... | 12 |
| Olefin Cross Metathesis .....                                         | 15 |
| General procedure for BOC de-protection - Acylation Reactions .....   | 19 |
| Biological Methods .....                                              | 32 |
| Preparation of the Screening Compounds.....                           | 32 |
| The Assay Protocol of the Inhibition Assays.....                      | 32 |
| Mass Spectrometry Analyses .....                                      | 32 |
| Cytotoxicity screening.....                                           | 49 |
| References .....                                                      | 50 |

## CHEMISTRY EXPERIMENTAL

### General Considerations

#### ***Compound Numbering System***

Numbered compounds in the manuscript have the same number in the ESI. All other compounds are numbered following the pattern S##.

#### ***Spectroscopic Data***

Infrared spectra were recorded using a golden gate (ATR) on a Perkin-Elmer FT-IR 1600 spectrometer and reported in the following format  $\nu_{\max}$  frequency (s, strong; br, broad and w, weak)  $\text{cm}^{-1}$ .  $^1\text{H}$  and  $^{13}\text{C}$  NMR spectra were acquired in  $\text{CDCl}_3$  or  $\text{CD}_3\text{OD}$  unless otherwise stated on a Varian VXR-400 ( $^1\text{H}$  at 400 MHz,  $^{13}\text{C}$  at 101 MHz) and reported as follows:

Chemical shift was reported in the following format;  $\delta$  (ppm) (number of protons, multiplicity, coupling constant J (Hz), assignment).

The residual protic solvent was used as internal reference:

$\text{CHCl}_3$   $\delta_{\text{H}} = 7.26$  ppm;  $\text{CDCl}_3$   $\delta_{\text{C}} = 77.16$  ppm

$\text{CHD}_2\text{OD}$   $\delta_{\text{H}} = 3.31$  ppm, 1.09 ppm;  $\text{CD}_3\text{OD}$   $\delta_{\text{C}} = 49.0$  ppm

Assignment of stereochemistry was carried out using COSY, HSQC, HMBC and NOESY experiments.

#### ***Mass Spectrometry***

Low Resolution Mass Spectra were obtained on Waters Micromass LCT Mass spectrometer. Gas-Chromatography Mass Spectra (GC-MS) were taken using a Thermo-Finnigan Trace. High-resolution mass spectra (HRMS) were performed on a Thermo-Finnigan LTQ FT Mass Spectrometer by Durham University Mass Spectroscopy service

## Experimental Procedures

### Synthesis of Intermediate compounds

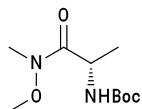

#### S01 (S)-tert-Butyl (1-(methoxy(methyl)amino)-1-oxopropan-2-yl)carbamate<sup>1</sup>

Procedure:<sup>2</sup> To a solution of *N*-(*tert*-butoxycarbonyl)-L-alanine (1.513 g, 8.0 mmol) in anhydrous CH<sub>2</sub>Cl<sub>2</sub> (50 ml) was added *N*-methylmorpholine (0.967 ml, 8.8 mmol, 1.1 eq.) and *N,O*-dimethylhydroxylamine hydrochloride (0.859 g, 8.8 mmol, 1.1 eq.) at -15 °C. To the reaction mixture was added 1-ethyl-3-(3-dimethylaminopropyl) carbodiimide hydrochloride (1.53 g, 8.8 mmol, 1.1 eq.) over 30 min at the same temperature. The reaction mixture was stirred for 4 hrs then poured into ice and 1N HCl. The resulting mixture was extracted with CH<sub>2</sub>Cl<sub>2</sub>. The organic layers were combined, and washed with brine, dried over MgSO<sub>4</sub>, filtered, and concentrated *in vacuo* to give the crude Weinreb amide as a white solid. Column chromatography on silica gel (from 25 % to 50 % EtOAc in pet. ether) gave 101 (1.69 g, 98 %) as a white solid.  $\nu_{max}$  (ATR) 3293 (s), 2976, 1703, 1658, 1537, 1293, 1173, 1066, 981 cm<sup>-1</sup>;  $\delta_H$  (700 MHz, CDCl<sub>3</sub>) 5.24 (1H, m, NH), 4.68 (1H, m, 2-*H*), 3.77 (3H, s, OCH<sub>3</sub>), 3.20 (3H, s, NCH<sub>3</sub>), 1.44 (9H, s, C(CH<sub>3</sub>)<sub>3</sub>), 1.31 (3H, d, *J* 6.9, 3-*H*<sub>3</sub>);  $\delta_C$  (176 MHz, CDCl<sub>3</sub>) 173.8 C1, 155.3 NHCOO, 79.7 C(CH<sub>3</sub>)<sub>3</sub>, 61.8 OCH<sub>3</sub>, 46.7 C2, 32.3 NCH<sub>3</sub>, 28.5 C(CH<sub>3</sub>)<sub>3</sub>, 18.9 C3; *m/z* (ES<sup>+</sup>) 232.9 [M]<sup>+</sup> C<sub>10</sub>H<sub>20</sub>O<sub>4</sub>N<sub>2</sub><sup>23</sup> (Expected: 232.1), 255.1 [M+Na]<sup>+</sup> C<sub>10</sub>H<sub>20</sub>O<sub>4</sub>N<sub>2</sub><sup>23</sup>Na (Expected: 255.1).

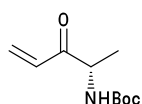

#### 13 (S)-tert-Butyl (3-oxopent-4-en-2-yl)carbamate<sup>3</sup>

Procedure:<sup>2</sup> Vinyl magnesium bromide (12 ml of 0.6M solution in THF, 7.2 mmol, 4 eq.) was added dropwise at 0 °C to a solution of S01 (400 mg, 1.8 mmol) in anhydrous THF (10 ml). The reaction mixture was allowed to warm up to room temperature. After the reaction mixture was stirred for 1 hr at the same temperature, the reaction mixture was poured into ice cooled 2N HCl. The resulting mixture was extracted with ethyl acetate. The organic layers were combined, washed with brine, dried over MgSO<sub>4</sub>, filtered, and concentrated *in vacuo* to give the crude products. Column chromatography on silica gel (from 10 % to 50 % EtOAc in pet. ether) gave 13 (335 mg, 98 %) as a white solid (*R<sub>f</sub>* ≈ 0.37; EtOAc/pet. ether 25/75).  $\nu_{max}$  (ATR) 3382 (s), 2975, 2931, 1710, 1694, 1612, 1518, 1282, 1246, 1162, 1003 cm<sup>-1</sup>;  $\delta_H$  (700 MHz, CDCl<sub>3</sub>) 6.45 (1H, dd, *J* 17.4, 10.5, 4-*H*), 6.37 (1H, dd, *J* 17.4, 1.3, 5-*H<sub>trans</sub>*), 5.88 (1H, d, *J* 10.5, 1.3, 5-*H<sub>cis</sub>*), 5.36 (1H, m, NH), 4.61 (1H, p, *J* 7.2, 2-*H*), 1.43 (9H, s, C(CH<sub>3</sub>)<sub>3</sub>), 1.33 (3H, d, *J* 7.2, 1-*H*<sub>3</sub>);  $\delta_C$  (176 MHz, CDCl<sub>3</sub>) 198.8 C3, 155.3 NHCOO, 132.9 C4, 130.3 C5, 79.8 C(CH<sub>3</sub>)<sub>3</sub>, 53.2 C2, 28.5 C(CH<sub>3</sub>)<sub>3</sub>, 18.6 C1; *m/z* (ES<sup>+</sup>) 222.2 [M+Na]<sup>+</sup> C<sub>10</sub>H<sub>17</sub>O<sub>3</sub>N<sup>23</sup>Na (Expected: 222.1).

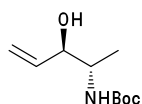

**16 tert-Butyl ((2S,3R)-3-hydroxypent-4-en-2-yl)carbamate<sup>4</sup>**

Procedure:<sup>2</sup> To a solution of 13 (500 mg, 2.5 mmol) in spectrophotometric grade ethanol (31 ml) was added lithium *tri-tert*-butoxy aluminium hydride (1.40 g, 5.5 mmol, 2.2 eq.) at  $-78$  °C. After the reaction mixture was stirred at the same temperature for 2 hrs, 0.1N HCl (15 ml) was added followed by Celite and EtOAc (15 ml). The resulting slurry was filtered through Celite and the filtering bed was washed with EtOAc (15ml). The two phases were separated and the aqueous phase was re-extracted with EtOAc. The organic extracts were combined, washed with  $\text{NaHCO}_3$  and brine, dried over  $\text{MgSO}_4$ , filtered, and concentrated in *vacuo* to give the product as a single diastereoisomer 16 as ascertained by crude  $^1\text{H}$  NMR. Column chromatography on silica gel (from 25 % to 50 % ethyl acetate in pet. ether) gave 16 (450 mg, 89 %) as a white solid ( $R_f \approx 0.3$ ; EtOAc/pet. ether 25/75).  $v_{\text{max}}$  (ATR) 3351 (br, s), 2986, 2937, 1679, 1529, 1280, 1161, 1021  $\text{cm}^{-1}$ ;  $\delta_{\text{H}}$  (700 MHz,  $\text{CDCl}_3$ ) 5.85 (1H, ddd,  $J$  17.2, 10.6, 5.5, 4-*H*), 5.33 (1H, dt,  $J$  17.2, 1.5, 5-*H}\_{\text{trans}}*), 5.23 (1H, dd,  $J$  10.6, 1.5, 5-*H}\_{\text{cis}}*), 4.65 (1H, m, *NH*), 4.22–4.16 (1H, m, 3-*H*), 3.84 (1H, m, 2-*H*), 1.44 (9H, s,  $\text{C}(\text{CH}_3)_3$ ), 1.09 (3H, d,  $J$  6.9, 1-*H}\_3*);  $\delta_{\text{C}}$  (176 MHz,  $\text{CDCl}_3$ ) 156.5  $\text{NHCOO}$ , 137.0 *C4*, 116.7 *C5*, 79.9  $\text{C}(\text{CH}_3)_3$ , 75.9 *C3*, 50.9 *C2*, 28.5  $\text{C}(\text{CH}_3)_3$ , 15.5 *C1*;  $m/z$  ( $\text{ES}^+$ ) 224.3  $[\text{M}+\text{Na}]^+$   $\text{C}_{10}\text{H}_{19}\text{O}_3\text{N}^{23}\text{Na}$  (Expected: 224.1).

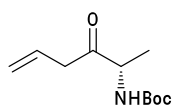

**19 (S)-tert-Butyl (3-oxohex-5-en-2-yl)carbamate<sup>5, 6</sup>**

Procedure:<sup>6</sup> A solution of *n*-BuLi (1.4 M solution in hexanes, 7.2 ml, 10 mmol, 1.0 eq.) was added dropwise at  $-10$  °C to a solution of *N*-(*tert*-butoxycarbonyl)-L-alanine (1.89 g, 10 mmol) in anhydrous THF (100 ml). The resulting thick gelatinous suspension was stirred at  $-10$  °C for 30 minutes, cooled to  $-78$  °C and treated with a solution of allylmagnesium bromide (1.0 M solution in ether, 23.0 ml, 23 mmol, 2.3 eq.). The resultant light grey slurry was stirred for 1 hour at  $-78$  °C, warmed to room temperature over 1 hour, stirred at this temperature for an additional 30 minutes and then poured into a mixture of sat. aq.  $\text{NH}_4\text{Cl}$  solution, ice and ether. The organic layer was separated and the aqueous layer was extracted with ether. The combined organic layers were washed with brine, dried over  $\text{MgSO}_4$ , filtered and concentrated under *vacuo* to yield the desired product 19 as a crystalline white solid (2.03 g, 9.5 mmol, 95 %). The product was used without further purification ( $R_f \approx 0.80$ ; EtOAc/pet. ether 67/33).  $v_{\text{max}}$  (ATR) 3386, 2975, 2932, 1726, 1694, 1642, 1516, 1166  $\text{cm}^{-1}$ ;  $\delta_{\text{H}}$  (500 MHz,  $\text{CDCl}_3$ ) 5.91 (1 H, ddt,  $J$  17.1, 10.2, 6.9, 5-*H*), 5.15 (3H, m, *NH* and 6-*H}\_2*), 4.41–4.31 (1H, m, 2-*H*), 3.34–3.21 (2H, m, 4-*H}\_2*), 1.43 (9H, s,  $\text{C}(\text{CH}_3)_3$ ), 1.33 (3H, d,  $J$  7.1, 1-*H}\_3*);  $\delta_{\text{C}}$  (126 MHz,  $\text{CDCl}_3$ ) 207.6 *C3*, 155.3  $\text{NHCOO}$ , 129.9 *C5*, 119.5 *C4*, 79.9  $\text{C}(\text{CH}_3)_3$ , 54.9 *C2*, 44.2 *C3*, 28.5  $\text{C}(\text{CH}_3)_3$ , 17.8 *C1*;  $m/z$  ( $\text{ES}^-$ ) 212.1  $[\text{M}-\text{H}]^-$ ; ( $\text{ES}^+$ ) 236.2  $[\text{M}+\text{Na}]^+$ ; HRMS ( $\text{ES}^+$ ) found  $[\text{M}+\text{Na}]^+$  236.1257,  $\text{C}_{11}\text{H}_{19}\text{O}_3\text{N}^{23}\text{Na}$  requires  $M^+$  236.1257.

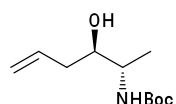

## 20 *tert*-Butyl (2*S*,3*R*)-3-hydroxyhex-5-en-2-ylcarbamate<sup>6</sup>

Procedure:<sup>6</sup> A solution of 19 (2 g, 9.4 mmol) in anhydrous methanol (60 ml) was treated with sodium borohydride (0.72 g, 18.5 mmol, 1.97 eq.) at  $-78$  °C. The resulting mixture was stirred for 90 minutes, carefully quenched by addition of a sat. aq.  $\text{NH}_4\text{Cl}$  solution at  $-78$  °C, warmed to room temperature, and diluted with 1M NaOH solution (24 ml) and ether (60 ml). The organic layer was separated and the aqueous layer was extracted with ether ( $2 \times 20$  ml). The combined organic extracts were washed with brine, dried over  $\text{MgSO}_4$ , filtered and concentrated under vacuum to yield the crude product as a white solid consists of an 82:18 mixture of 20 and the other diastereoisomer respectively as determined by analysis of the  $^1\text{H}$  NMR spectra of the crude product. The crude mixture was purified by chromatography (25 % ethyl acetate in pet. ether) to yield 0.73 g of a 70/30 mixture of the diastereoisomers followed by 1.14 g of pure 20 with total yield 92 % (1.87 g, 8.7 mmol) ( $R_f$  20  $\approx$  0.30,  $R_f$  20'  $\approx$  0.32; EtOAc/pet. ether 25/75). 20;  $\nu_{\text{max}}$  (ATR) 3358 (br, s), 2979, 2940, 1681 (s), 1526 (s), 1174 (s), 1024 (s)  $\text{cm}^{-1}$ ;  $\delta_{\text{H}}$  (500 MHz,  $\text{CDCl}_3$ ) 5.84 (1H, ddt,  $J$  7.3, 10.3, 14.4, 5- $H$ ), 5.19–5.09 (2H, m, 6- $H$ ), 4.75 (1H, br s, NH), 3.71 (2H, m, 2- $H$  and 3- $H$ ), 2.38–2.11 (3H, m, OH, 4- $H_2$ ), 1.44 (9H, s,  $\text{C}(\text{CH}_3)_3$ ), 1.12 (3H, d,  $J$  6.8, 1- $H_3$ );  $\delta_{\text{C}}$  (101 MHz,  $\text{CDCl}_3$ ) 156.0  $\text{NHCOO}$ , 134.8 C5, 118.2 C6, 79.6  $\text{C}(\text{CH}_3)_3$ , 73.4 C3, 50.4 C2, 38.5 C4, 28.5  $\text{C}(\text{CH}_3)_3$ , 14.7 C1;  $m/z$  ( $\text{ES}^+$ ) 238.2  $[\text{M}+\text{Na}]^+$ ; HRMS ( $\text{ES}^+$ ) found  $[\text{M}+\text{Na}]^+$  238.1414,  $\text{C}_{11}\text{H}_{21}\text{O}_3\text{N}^{23}\text{Na}$  requires  $M^+$  238.1414.

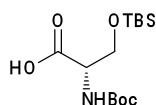

## S02 (S)-2-((*tert*-Butoxycarbonyl)amino)-3-((*tert*-butyldimethylsilyl)oxy)propanoic acid<sup>2, 6</sup>

Procedure:<sup>6</sup> To a solution of *N*-(*tert*-butoxycarbonyl)-L-serine (512 mg, 2.5 mmol) in anhydrous DMF (12 mL), imidazole (509 mg, 7.5 mmol, 3 eq.) was added and the reaction mixture was cooled to 0 °C followed by addition of TBSCl (490 mg, 3.25 mmol, 1.3 eq.). The resulting mixture was slowly warmed to room temperature and stirred overnight and followed by TLC. Upon total consumption of the starting material (monitored by TLC), the reaction mixture was poured into a mixture of ice cooled 1N HCl (5 mL) and ether (20 mL) to hydrolyze the silyl ester. The organic layer was separated and the aqueous layer was extracted with ether ( $2 \times 20$  ml). The combined organic extracts were washed with brine, dried over  $\text{MgSO}_4$ , filtered and concentrated under vacuum to yield the desired product S02 as pale yellow sticky oil (630 mg, 1.97 mmol, 79 %).  $\nu_{\text{max}}$  (ATR) 3380-3492 (br), 3451 (s), 2952, 2569, 1724, 1691, 1505  $\text{cm}^{-1}$ ;  $\delta_{\text{H}}$  (200 MHz,  $\text{CDCl}_3$ ) 8.49 (1H, br s, acidic OH), 5.35 (1H, br d,  $J$  8.2, NH), 4.36 (1H, m, 2- $H$ ), 4.09 (1H, A of ABX syst., m, 3- $HH$ ), 3.83 (1H, B of ABX syst., dd,  $J$  10.1, 3.5, 3- $HH$ ), 1.44 (9H, s,  $\text{OC}(\text{CH}_3)_3$ ), 0.86 (9H, s,  $\text{SiC}(\text{CH}_3)_3$ ), 0.03, 0.2 ( $2 \times$  3H, s,  $\text{SiCH}_3$ );  $\delta_{\text{C}}$  (75 MHz,  $\text{CDCl}_3$ ) 175.3  $\text{COOH}$ , 155.5  $\text{NHCOO}$ , 80.1  $\text{OC}(\text{CH}_3)_3$ , 63.7 C3, 55.6 C2, 28.2  $\text{OC}(\text{CH}_3)_3$ , 25.7  $\text{SiC}(\text{CH}_3)_3$ , 18.4  $\text{SiC}(\text{CH}_3)_3$ , -5.5  $\text{SiCH}_3$ , -5.6  $\text{SiCH}_3$ ;  $m/z$  ( $\text{ES}^+$ ) 320.3  $[\text{M}+\text{H}]^+$   $\text{C}_{14}\text{H}_{30}\text{O}_5\text{N}$  (Expected: 320.2).

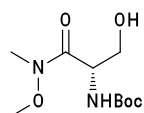

**S03 (S)-tert-Butyl (3-hydroxy-1-(methoxy(methyl)amino)-1-oxopropan-2-yl)carbamate<sup>2,7</sup>**

Procedure:<sup>2</sup> To a solution of *N*-(*tert*-butoxycarbonyl)-L-serine (3.075 g, 15 mmol) in anhydrous CH<sub>2</sub>Cl<sub>2</sub> (100 ml) was added *N*-methylmorpholine (1.812 ml, 16.5 mmol, 1.1 eq.) and *N,O*-dimethylhydroxylamine hydrochloride (1.610 g, 16.5 mmol, 1.1 eq.) at -15 °C. To the reaction mixture was added 1-ethyl-3-(3-dimethylaminopropyl)carbodiimide hydrochloride (2.874 g, 16.5 mmol, 1.1 eq.) over 30 min at the same temperature. The reaction mixture was stirred for 4 hrs then poured into ice and 1N HCl. The resulting mixture was extracted with CH<sub>2</sub>Cl<sub>2</sub>. The organic layers were combined, and washed with brine, dried over MgSO<sub>4</sub>, filtered, and concentrated *in vacuo* to give the crude Weinreb amide S03 (3.400 gm, 91%) as a colourless solid. The crude product was at high purity and was used directly without further purification.  $\nu_{max}$  (ATR) 3329, 2935, 1715, 1665, 1498, 1173 cm<sup>-1</sup>;  $\delta_H$  (500 MHz, CDCl<sub>3</sub>) 5.57 (1H, br s, NH), 4.89–4.74 (1H, m, 2-*H*), 3.86–3.79 (2H, m, 3-*H*<sub>2</sub>), 3.78 (3H, s, OCH<sub>3</sub>), 3.24 (3H, s, NCH<sub>3</sub>), 2.49 (1H, br s, OH), 1.45 (9H, s, C(CH<sub>3</sub>)<sub>3</sub>);  $\delta_C$  (126 MHz, CDCl<sub>3</sub>) 170.9 C1, 156.0 NHCOO, 80.3 C(CH<sub>3</sub>)<sub>3</sub>, 64.1 C3, 61.8 OCH<sub>3</sub>, 52.5 C2, 31.1 NCH<sub>3</sub>, 28.5 C(CH<sub>3</sub>)<sub>3</sub>;  $m/z$  (ES<sup>+</sup>) 271.2 [M+Na]<sup>+</sup> C<sub>10</sub>H<sub>20</sub>O<sub>5</sub>N<sub>2</sub><sup>23</sup>Na (Expected: 271.1).

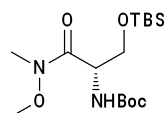

**S04 (S)-tert-Butyl (3,8,8,9,9-pentamethyl-4-oxo-2,7-dioxa-3-aza-8-siladecan-5-yl)carbamate<sup>2</sup>**

Procedure:<sup>7</sup> To a solution of S03 (500 mg, 2.02 mmol) in anhydrous DMF (2.5 mL) were added imidazole (410 mg, 6.12 mmol, 3 eq.) and a catalytic amount of DMAP (25 mg, 0.2 mmol, 0.1 eq.) at 0 °C followed by addition of a solution of TBSCl (349 mg, 2.32 mmol, 1.15 eq.) in anhydrous DMF (2.5 ml). The resulting mixture was allowed to warm up to room temperature, stirred overnight, and poured into sat. aq. NH<sub>4</sub>Cl solution (5 ml) and extracted with CH<sub>2</sub>Cl<sub>2</sub> (3 × 20 ml). The combined organic extracts were washed with brine, dried over MgSO<sub>4</sub>, filtered and concentrated under vacuum to yield the crude product as yellowish viscous oil. Column chromatography on silica gel (from 25% to 50% EtOAc in pet. ether) gave S04 (650 mg, 1.80 mmol, 89%) as a sticky oil ( $R_f \approx 0.25$ ; EtOAc/pet. ether 25/75).  $\nu_{max}$  (ATR) 2931, 2857, 2350, 1711, 1661, 1494, 1468, 1168, 1111, 837 cm<sup>-1</sup>;  $\delta_H$  (700 MHz, CDCl<sub>3</sub>) 5.35 (1H, br d, *J* 8.5, NH), 4.80–4.70 (1H, m, 5-*H*), 3.84 (1H, dd, *J* 9.4, 4.5, 6-*HH*), 3.78 (1H, dd, *J* 9.7, 4.5, 6-*HH*), 3.74 (3H, s, 1-*H*<sub>3</sub>), 3.20 (3H, s, NCH<sub>3</sub>), 1.43 (9H, s, C(CH<sub>3</sub>)<sub>3</sub>), 0.85 (9H, s, SiC(CH<sub>3</sub>)<sub>3</sub>), 0.02, 0.01 (2 × 3H, s, SiCH<sub>3</sub>);  $\delta_C$  (176 MHz, CDCl<sub>3</sub>) 170.9, 155.5, 79.7, 63.7, 61.6, 52.6, 32.3, 28.5, 25.9, -5.4, -5.4;  $m/z$  (ES<sup>+</sup>) 385.2 [M+Na]<sup>+</sup> C<sub>16</sub>H<sub>34</sub>O<sub>5</sub>N<sub>2</sub><sup>28</sup>Si<sup>23</sup>Na (Expected: 385.1).

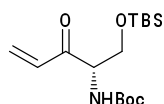

## 12 (S)-tert-Butyl 1-((tert-butyldimethylsilyl)oxy)-3-oxopent-4-en-2-ylcarbamate<sup>2</sup>

Procedure:<sup>2</sup> A (0.6 M) solution of vinyl magnesium bromide (c.a. 11 ml, 6.64 mmol, 4 eq.) in THF was added dropwise at 0 °C to a solution of S04 (600 mg, 1.66 mmol) in anhydrous THF (10 ml). The reaction mixture was allowed to warm up to room temperature. After the reaction mixture was stirred for 1 hour at the same temperature, the reaction mixture was poured into ice cooled 2N HCl. The resulting mixture was extracted with ethyl acetate. The organic layers were combined, washed with brine, dried over MgSO<sub>4</sub>, filtered, and concentrated in vacuo to give the crude products. Column chromatography on silica gel (from 5% to 20% EtOAc in pet. ether) gave 12 (920 mg, 84%) as a viscous oil (*R<sub>f</sub>* ≈ 0.78; EtOAc/pet. ether 25/75). *v*<sub>max</sub> (ATR) 3460, 2865, 1695, 1489, 1359, 1173 cm<sup>-1</sup>; δ<sub>H</sub> (700 MHz, CDCl<sub>3</sub>) 6.55 (1H, dd, *J* 17.5, 10.7, 4-CH), 6.34 (1H, dd, *J* 17.5, 1.0, 5-CH<sub>trans</sub>), 5.83 (1H, d, *J* 10.7, 1.0, 5-CH<sub>cis</sub>), 5.52 (1H, br d, *J* 6.8, NH), 4.63–4.56 (1H, m, 2-CH), 4.00 (1H, dd, *J* 10.2, 3.1, 1-CHH), 3.85 (1H, dd, *J* 10.2, 4.4, 1-CHH), 2.04 (1H, s, OH), 1.44 (9H, s, C(CH<sub>3</sub>)<sub>3</sub>), 0.83 (9H, s, SiC(CH<sub>3</sub>)<sub>3</sub>), 0.02, 0.01 (2 × 3H, s, SiCH<sub>3</sub>); δ<sub>C</sub> (176 MHz, CDCl<sub>3</sub>) 196.8, 155.3, 133.1, 129.3, 79.7, 63.4, 59.5, 28.3, 25.7, 18.2, -5.6; *m/z* (ES<sup>+</sup>) 330.5 [M+H]<sup>+</sup> C<sub>16</sub>H<sub>32</sub>O<sub>4</sub>N<sub>1</sub><sup>28</sup>Si (Expected: 330.2).

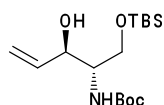

## 14 tert-Butyl ((2S,3R)-1-((tert-butyldimethylsilyl)oxy)-3-hydroxypent-4-en-2-yl)carbamate<sup>2</sup>

Procedure:<sup>2</sup> To a solution of the enone 12 (910 mg, 2.77 mmol) in spectrophotometric grade ethanol (35 ml) was added lithium *tri-tert*-butoxy aluminium hydride (1.546 g, 6.1 mmol, 2.2 eq.) at -78 °C. After the reaction mixture was stirred at the same temperature for 2 hrs, 0.1N HCl (16.5 ml) was added followed by Celite and EtOAc (16.5 ml). The resulting slurry was filtered through Celite and the residue was washed with EtOAc (16.5ml). The two phases were separated and the aqueous phase re-extracted with EtOAc. The organic extracts were combined, washed with NaHCO<sub>3</sub> and brine, dried over MgSO<sub>4</sub>, filtered, and concentrated *in vacuo* to give the crude product as a single diastereomer 14 as indicated by the <sup>1</sup>H NMR analysis. Column chromatography on silica gel (from 20% to 50% ethyl acetate in pet. ether) gave 14 (870 mg, 95%) as a viscous oil (*R<sub>f</sub>* ≈ 0.40; EtOAc/pet. ether 25/75). *v*<sub>max</sub> (ATR) 3445, 2940, 1699, 1494, 1168, 840 cm<sup>-1</sup>; δ<sub>H</sub> (500 MHz, CDCl<sub>3</sub>) 5.91 (1H, ddd, *J* 17.1, 10.6, 4.9, 4-H), 5.37 (1H, dd, *J* 17.1, 1.6, 5-*H*<sub>trans</sub>), 5.27 (1H, br d, *J* 7.9, NH), 5.23 (1H, dd, *J* 10.6, 1.6, 5-*H*<sub>cis</sub>), 4.29–4.22 (1H, m, 3-H), 3.91 (1H, dd, *J* 10.4, 2.9, 1-HH), 3.74 (1H, dd, *J* 8.3, 2.9 1-HH), 3.65–3.58 (1H, br s, OH), 3.47 (1H, m, 2-H), 1.44 (9H, s, OC(CH<sub>3</sub>)<sub>3</sub>), 0.88 (9H, s, SiC(CH<sub>3</sub>)<sub>3</sub>), 0.05, 0.04 (2 × 3H, s, SiCH<sub>3</sub>); δ<sub>C</sub> (126 MHz, CDCl<sub>3</sub>) 155.9, 138.0, 115.9, 79.7, 74.9, 63.6, 54.2, 28.5, 28.5, 25.9, 25.9, 18.2, -5.52, -5.54; *m/z* (ES<sup>+</sup>) 332.4 [M+H]<sup>+</sup> C<sub>16</sub>H<sub>33</sub>O<sub>4</sub>N<sub>1</sub>Si<sub>1</sub> (Expected: 332.2), 354.4 [M+Na]<sup>+</sup> C<sub>16</sub>H<sub>33</sub>O<sub>4</sub>N<sub>1</sub><sup>28</sup>Si<sup>23</sup>Na (Expected: 354.2).

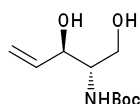

**15 tert-Butyl ((2S,3R)-1,3-dihydroxypent-4-en-2-yl)carbamate<sup>2</sup>**

Procedure: A solution of 14 (100 mg, 0.3 mmol) in methanol (1.5 ml) was treated with 2N HCl (150  $\mu$ l) dropwise at  $-0^{\circ}\text{C}$ . The resulting mixture was stirred for 15 minutes at the same temperature and monitored by TLC. Upon complete consumption of the starting material, the reaction was quenched by addition of a brine solution (5 ml) and extracted with EtOAc ( $2 \times 10$  ml). The combined organic layers were washed with brine, dried over  $\text{MgSO}_4$ , filtered and concentrated under vacuum to yield the crude product. Column chromatography on silica gel (from 25% to 50% ethyl acetate in pet. ether and elution with MeOH) gave 15 (60 mg, 2.76 mmol, 92 %) as viscous oil ( $R_f \approx 0.13$ ; EtOAc/pet. ether 50/50).  $\nu_{\text{max}}$  (ATR) 3456, 2931, 1705, 1510, 1177, 842  $\text{cm}^{-1}$ ;  $\delta_{\text{H}}$  (700 MHz,  $\text{CDCl}_3$ ) 5.94 (1H, ddd,  $J$  16.9, 10.6, 5.3, 4- $H$ ), 5.40 (1H, d,  $J$  16.9, 5- $H_{\text{trans}}$ ), 5.35 (1H, br s, NH), 5.27 (1H, d,  $J$  10.6, 5- $H_{\text{cis}}$ ), 4.39 (1H, br s, 3- $H$ ), 3.93 (1H, dd,  $J$  11.2, 3.5, 1- $HH$ ), 3.74–3.68 (1H, m, 1- $HH$ ), 3.68–3.61 (1H, m, 2- $H$ ), 2.85 (1H, app d,  $J$  4.5, 3- $OH$ ), 2.57 (1H, br s, 1- $OH$ ), 1.45 (9H, s,  $\text{C}(\text{CH}_3)_3$ );  $\delta_{\text{C}}$  (176 MHz,  $\text{CDCl}_3$ ) 156.3, 137.6, 116.7, 80.1, 75.1, 62.7, 55.1, 28.5;  $m/z$  ( $\text{ES}^+$ ) 240.4  $[\text{M}+\text{Na}]^+$   $\text{C}_{10}\text{H}_{19}\text{O}_4\text{N}^{23}\text{Na}$  (Expected: 240.1).

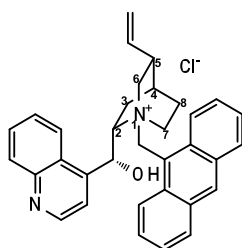

**S05 (1S,2S,4S,5R)-1-(Anthracen-9-ylmethyl)-2-((R)-hydroxy(quinolin-4-yl)methyl)-5-vinyl-1-azoniabicyclo[2.2.2]octane chloride<sup>8</sup>**

Procedure:<sup>8</sup> To a suspension of cinchonidine (294 mg, 1.0 mmol) in toluene (4 ml) was added 9-(chloromethyl)anthracene (237 mg, 1.05 mmol, 1.05 eq.), and the mixture was stirred at reflux  $110^{\circ}\text{C}$  for 3 hrs. The mixture was cooled to room temperature, poured into 20 ml of ether. The solid residue was collected by centrifugation and decantation of the liquid phase. The residue was washed by ether ( $2 \times 20$  ml) and collected by centrifugation. The mother liquor was concentrated *in vacuo* and the residue was dissolved in  $\text{CH}_2\text{Cl}_2$ /ether and kept at  $-20^{\circ}\text{C}$  to precipitate another fraction of the product. The combined solid residue was recrystallized from  $\text{CH}_2\text{Cl}_2$ /ether and kept at  $-20^{\circ}\text{C}$  to afford S05 (460 mg, 0.88 mmol, 88%) as light yellow solid ( $R_f \approx 0.30$ ;  $\text{CH}_2\text{Cl}_2$ /MeOH 93/7).  $\delta_{\text{H}}$  (400 MHz,  $\text{CDCl}_3$ , 20 mg/ml)<sup>9</sup> 8.97 (1H, d,  $J$  8.4), 8.86 (1H, d,  $J$  4.3), 8.79 (2H, d,  $J$  8.9), 8.17 (1H, d,  $J$  4.9), 8.06–8.01 (2H, m,  $J$  4.7), 7.71 (1H, d,  $J$  8.2), 7.68–7.64 (1H, m), 7.61 (1H, d,  $J$  7.8), 7.47–7.40 (1H, m), 7.29–7.21 (4H, m), 7.19–7.09 (1H, m), 7.09–7.04 (1H, m), 6.74 (2H, s), 5.42 (1H, ddd,  $J$  16.8, 10.5, 6.1), 5.21 (1H, d,  $J$  16.8), 4.90 (1H, dd,  $J$  10.5, 1.4), 4.85–4.73 (1H, m), 4.72–4.58 (1H, m), 3.97 (1H, d,  $J$  13.0), 2.58 (1H, dd,  $J$  12.9, 10.6), 2.47 (1H, app. t,  $J$  12.6), 2.18–2.06 (1H, m), 1.95–1.77 (2H, m), 1.77–1.56 (1H, m), 1.22–1.11 (1H, m), 1.11–0.95 (1H, m);  $\delta_{\text{C}}$  (176 MHz,  $\text{CDCl}_3$ ) 149.01, 136.52, 133.38, 132.76, 131.21, 130.45, 130.39, 128.98, 128.86, 128.38, 127.76, 127.46, 127.23, 125.98, 125.73, 124.93, 124.91, 124.38, 124.06, 120.26, 118.26, 117.86, 67.22, 67.18, 61.58, 54.98, 50.66, 38.64, 25.99, 25.81, 23.50;  $m/z$  ( $\text{ES}^+$ ) 485.5  $[\text{M}]^+$   $\text{C}_{34}\text{H}_{33}\text{ON}_2$  (Expected: 485.3).



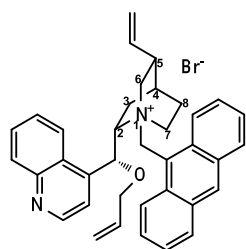

**29 (1S,2S,4S,5R)-2-((R)-Allyloxy(quinolin-4-yl)methyl)-1-(anthracen-9-ylmethyl)-5-vinyl-1-azoniabicyclo[2.2.2]octane bromide<sup>8</sup>**

Procedure:<sup>8</sup> To a suspension of S05 (200 mg, 0.39 mmol) in CH<sub>2</sub>Cl<sub>2</sub> (5 ml) was added allyl bromide (100  $\mu$ l, 1.17 mmol, 3.05 eq.) and 50% aq. KOH solution (200  $\mu$ l, 1.9 mmol, 5 eq.). The resulting mixture was stirred vigorously at room temperature for 4 hrs. The mixture was diluted with water (6.25 ml) and extracted with CH<sub>2</sub>Cl<sub>2</sub> (3  $\times$  5 ml). The combined organic extracts were dried over MgSO<sub>4</sub>, filtered and concentrated *in vacuo*. Recrystallization of the residue from MeOH/ether at -20 °C afforded the desired product 29 (190 mg, 0.32 mmol, 84%) as an orange solid.  $\delta_{\text{H}}$  (700 MHz, CD<sub>3</sub>OD, 25 mg/ml)<sup>9</sup> 9.07 (1H, d, *J* 4.4), 8.93 (1H, s), 8.77 (1H, d, *J* 9.0), 8.63–8.56 (1H, m), 8.48 (1H, d, *J* 9.1), 8.31–8.26 (2H, m), 8.25 (1H, d, *J* 8.3), 8.01–7.93 (3H, m, *J* 15.0, 7.2), 7.83 (1H, dd), 7.79 (1H, dd, *J* 8.5, 7.2), 7.68 (2H, dd, *J* 14.4, 6.3), 6.98 (1H, s), 6.44 (2H, ddd, *J* 15.9, 11.0, 5.6), 5.92 (1H, d, *J* 13.9), 5.76–5.67 (2H, m), 5.58 (1H, d, *J* 10.4), 5.06–4.98 (2H, m, *J* 13.2), 4.59–4.52 (2H, m, *J* 13.0, 6.0), 4.51–4.42 (2H, m), 3.80 (1H, d, *J* 13.0), 3.30–3.24 (1H, m), 2.94 (1H, td, *J* 11.6, 5.1), 2.54–2.42 (2H, m, *J* 23.5, 13.6), 2.21 (1H, s), 2.00 (1H, s), 1.70–1.58 (2H, m);  $\delta_{\text{C}}$  (176 MHz, CD<sub>3</sub>OD) 151.05, 149.38, 142.94, 138.50, 134.80, 134.67, 134.61, 133.94, 133.10, 133.04, 131.52, 131.31, 131.18, 130.66, 129.41, 129.26, 127.08, 126.66, 126.57, 125.28, 124.88, 121.65, 119.12, 117.80, 71.44, 70.12, 63.55, 57.42, 53.69, 49.53, 39.48, 27.30, 26.26, 23.31; *m/z* (ES<sup>+</sup>) 525.5 [M]<sup>+</sup> C<sub>37</sub>H<sub>37</sub>ON<sub>2</sub> (Expected: 525.3).

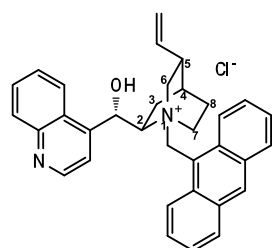

**S06 (1S,2R,4S,5R)-1-(Anthracen-9-ylmethyl)-2-((S)-hydroxy(quinolin-4-yl)methyl)-5-vinyl-1-azoniabicyclo[2.2.2]octane chloride<sup>9</sup>**

Procedure:<sup>9</sup> To a suspension of cinchonine (294 mg, 1.0 mmol) in toluene (4 ml) was added 9-(chloromethyl)anthracene (237 mg, 1.05 mmol, 1.05 eq.), and the mixture was stirred at reflux 110 °C for 4 days. The mixture was cooled to room temperature, poured into 20 ml of ether. The solid residue was collected by centrifugation and decantation of the liquid phase. The residue was washed by ether (2  $\times$  20 ml) and collected by centrifugation. The mother liquor was concentrated *in vacuo* and the residue was dissolved in CH<sub>2</sub>Cl<sub>2</sub>/ether and kept at -20 °C to precipitate another fraction of the product. The combined solid residue was recrystallized from CH<sub>2</sub>Cl<sub>2</sub>/ether and kept at -20 °C to afford S06 (250 mg, 0.48 mmol, 48%) as light yellow solid (*R<sub>f</sub>*  $\approx$  0.30; Page 9 of 50

CH<sub>2</sub>Cl<sub>2</sub>/MeOH 93/7).  $\delta_{\text{H}}$  (700 MHz, CDCl<sub>3</sub>, 25 mg/ml)<sup>9</sup> 9.24 (1H, d, *J* 8.6), 8.92 (1H, d, *J* 6.7), 8.81 (1H, s), 8.41 (1H, d, *J* 8.7), 8.20 (1H, s), 8.02 (1H, d, *J* 3.7), 7.85 (1H, s), 7.55 (1H, d, *J* 8.1), 7.53 (1H, d, *J* 8.3), 7.45 (1H, d, *J* 8.2), 7.27–7.23 (1H, m), 7.21–7.16 (2H, m), 7.11–7.06 (1H, m, *J* 6.7), 7.06–7.02 (1H, m, *J* 7.2), 6.98–6.89 (3H, m), 6.46 (1H, d, *J* 13.7), 5.56 (1H, ddd, *J* 17.2, 10.5, 6.6), 5.00 (1H, d, *J* 10.5), 4.84 (1H, d, *J* 17.3), 4.75–4.68 (1H, m), 4.44–4.36 (1H, m), 4.24 (1H, t, *J* 11.5), 2.45 (2H, t, *J* 12.0), 2.30 (1H, dd, *J* 20.5, 10.7), 1.92 (1H, t, *J* 12.6), 1.73–1.64 (2H, m, *J* 23.5, 10.1), 1.49 (1H, s), 1.34 (1H, t, *J* 11.1), 0.65 – 0.57 (1H, m);  $\delta_{\text{C}}$  (176 MHz, CDCl<sub>3</sub>) 149.4, 147.0, 145.6, 135.6, 133.1, 132.8, 130.9, 130.4, 130.1, 129.0, 128.5, 128.2, 127.6, 127.3, 126.9, 124.9, 124.9, 124.61, 120.1, 118.1, 117.5, 67.8, 66.8, 57.6, , 54.3, 54.0, 38.1, 26.4, 24.1, 22.7; *m/z* (ES<sup>+</sup>) 485.8 [M]<sup>+</sup> C<sub>34</sub>H<sub>33</sub>ON<sub>2</sub> (Expected: 485.3).

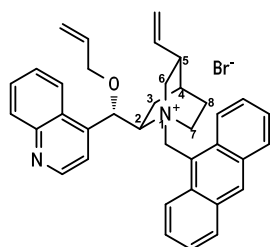

**28 (1*S*,2*R*,4*S*,5*R*)-2-((*S*)-Allyloxy(quinolin-4-yl)methyl)-1-(anthracen-9-ylmethyl)-5-vinyl-1-azoniabicyclo [2.2.2]octane bromide<sup>10</sup>**

Procedure:<sup>8</sup> To a suspension of S06 (272 mg, 0.52 mmol) in CH<sub>2</sub>Cl<sub>2</sub> (7 ml) was added allyl bromide (141  $\mu$ l, 1.63 mmol, 3.05 eq.) and 50% aq. KOH solution (286  $\mu$ l, 2.6 mmol, 5 eq.). The resulting mixture was stirred vigorously at room temperature for 4 hrs. The mixture was diluted with water (9 ml) and extracted with CH<sub>2</sub>Cl<sub>2</sub> (3  $\times$  7 ml). The combined organic extracts were dried over MgSO<sub>4</sub>, filtered and concentrated *in vacuo*. Recrystallization of the residue from MeOH/ether at -20 °C afforded the desired product 28 (275 mg, 0.45 mmol, 87%) as orange solid.  $\delta_{\text{H}}$  (700 MHz, CD<sub>3</sub>OD, 18 mg/ml)<sup>9</sup> 9.04 (1H, d, *J* 4.0), 9.01 (1H, d, *J* 9.0), 8.77 (2H, m), 8.27 (1H, d, *J* 8.7), 8.20–8.14 (3H, m), 8.00 (1H, s), 7.94–7.90 (2H, m), 7.84–7.79 (1H, m), 7.70–7.66 (1H, m), 7.62 – 7.57 (2H, m, *J* 10.4, 5.4), 6.90 (1H, s), 6.46–6.38 (1H, m), 6.13–5.99 (2H, m), 5.93 (1H, ddd, *J* 17.2, 10.6, 6.9), 5.72 (1H, d, *J* 17.2), 5.63 (1H, d, *J* 10.6), 5.19 (1H, d, *J* 10.5), 5.04 (1H, d, *J* 17.3), 4.58 (1H, m), 4.55 (1H, dd, *J* 12.8, 6.0), 4.41–4.34 (3H, m), 3.11 (1H, app. t, *J* 11.5), 2.77 (1H, m), 2.55–2.50 (1H, m), 2.25–2.14 (1H, m), 1.85–1.78 (2H, m), 1.64–1.55 (1H, m), 1.20–1.12 (1H, m), 0.70 (0.45H, t, *J* 7.4); *m/z* (ES<sup>+</sup>) 525.7 [M]<sup>+</sup> C<sub>37</sub>H<sub>37</sub>ON<sub>2</sub> (Expected: 525.3).

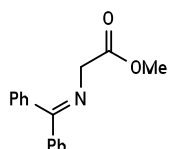

## 22 Methyl 2-((diphenylmethylene)amino)acetate<sup>11</sup>

Procedure:<sup>11</sup> To a suspension of methyl glycine hydrochloride (753 mg, 6 mmol) in anhydrous CH<sub>2</sub>Cl<sub>2</sub> (20 ml), an equimolar amount of benzophenone imine (1 ml, 6 mmol) was added and the reaction mixture was stirred at room temperature for 24 hr. The reaction mixture was filtered to remove NH<sub>4</sub>Cl and evaporated to dryness on a rotary evaporator. The residue was dissolved in 20 mL of ether, filtered, washed with 20 mL of water, and dried over MgSO<sub>4</sub> to yield the crude product. Column chromatography on silica gel (from 10% to 50% ethyl acetate in pet. ether) gave 22 (1.221 g, 4.8 mmol, 80 %) as white waxy solid ( $R_f \approx 0.33$ ; EtOAc/pet. ether 33/67).  $\nu_{max}$  (ATR) 2948, 2890, 2361, 1970, 1752, 1622, 1573, 1384, 1195, 682 cm<sup>-1</sup>;  $\delta_H$  (700 MHz, CDCl<sub>3</sub>) 7.66 (2H, m, ArH), 7.49–7.42 (3H, m, ArH), 7.40 (1H, m, Ar'H), 7.33 (2H, m, Ar'H), 7.18 (2H, m, Ar'H), 4.22 (2H, s, 2-H<sub>2</sub>), 3.74 (3H, s, OCH<sub>3</sub>);  $\delta_C$  (176 MHz, CDCl<sub>3</sub>) 172.0, 171.2, 139.3, 136.0, 130.6, 128.9, 128.9, 128.8, 128.2, 127.8, 55.7, 52.1; m/z (ES<sup>+</sup>) 254.4 [M+H]<sup>+</sup> C<sub>16</sub>H<sub>16</sub>O<sub>2</sub>N (Expected: 254.1).

## General Procedure for Phase Transfer Catalysis<sup>8, 12</sup>

To an ice cooled solution of the Schiff base 22 in Toluene/CH<sub>2</sub>Cl<sub>2</sub> (7:3 v/v), the cinchona catalyst 29 or 28 was added (5 mol%) followed by dropwise addition of allyl bromide (5.0 eq.) at 0 °C. The reaction mixture was stirred for 5 min before the dropwise addition of 50% aq. KOH (5 eq.). The reaction was stirred vigorously overnight from 0 °C to room temperature. The reaction was monitored by TLC and upon completion; the reaction mixture was diluted with water (10 ml) and extracted with EtOAc (3 × 5 ml). The organics were dried over MgSO<sub>4</sub>, filtered, and evaporated in vacuo, affording the crude products.

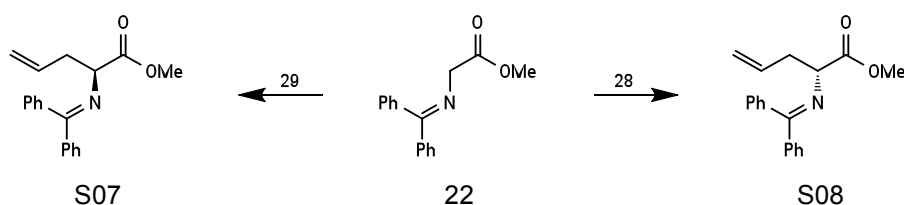

**S07 (S)-Methyl 2-((diphenylmethylene)amino)pent-4-enoate**<sup>8</sup>

**S08 (R)-Methyl 2-((diphenylmethylene)amino)pent-4-enoate**

$\nu_{max}$  (ATR) 2954, 2385, 1704, 1491, 1168, 840 cm<sup>-1</sup>;  $\delta_H$  (400 MHz, CDCl<sub>3</sub>) 7.65–7.61 (2H, m, ArH), 7.47–7.42 (3H, m, ArH), 7.40–7.36 (1H, m, ArH), 7.35–7.30 (2H, m, ArH), 7.19–7.14 (2H, m, ArH), 5.67 (1H, ddt, *J* 17.1, 10.1, 7.2, 4-*H*), 5.07 (1H, dd, *J* 17.1, 2.0, 5-*HH*), 5.02 (1H, dd, *J* 10.1, 2.0, 5-*HH*), 4.16 (1H, dd, *J* 7.8, 5.3, 2-*H*), 3.72 (3H, s, OCH<sub>3</sub>), 2.75–2.56 (2H, m, 3-*H*<sub>2</sub>);  $\delta_C$  (101 MHz, CDCl<sub>3</sub>) 172.4 (COOCH<sub>3</sub>), 170.8 (Ph<sub>2</sub>CN), 139.6 (Ar), 136.4 (Ar), 134.4 (Ar), 130.5 (C4), 128.94 (Ar), 128.78 (Ar), 128.61 (Ar), 128.14 (Ar), 128.03 (Ar), 117.8 (C5), 65.4 (C2), 52.1 (OCH<sub>3</sub>), 38.3 (C3).

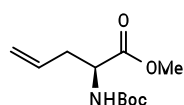

**S09 (S)-Methyl 2-((tert-butoxycarbonyl)amino)pent-4-enoate**<sup>13, 14</sup>

Procedure:<sup>15</sup> A mixture of the starting material S07 (735 mg, 2.51 mmol) and 4N HCl (3.1 ml, excess) in MeOH (10 ml) was refluxed for 1 hr. The reaction mixture was allowed to cool down to room temperature. The reaction mixture was extracted by ether (2 × 5 ml). The ether layer was discarded and the aqueous layer was basified by NaHCO<sub>3</sub> to pH 8 followed by addition of Boc<sub>2</sub>O (Boc anhydride) (824 mg, 3.77 mmol, 1.5 eq.) and the reaction was stirred for 2 hrs at room temperature and monitored by TLC. The reaction volume was reduced under vacuum and extracted with EtOAc (3 × 10 ml). The combined organic extracts were washed with brine, dried over MgSO<sub>4</sub>, filtered and evaporated in vacuo to afford the crude product. Column chromatography on silica gel (from 20% to

50% ethyl acetate in pet. ether) gave S09 (442 g, 1.9 mmol, 76%) as viscous liquid ( $R_f \approx 0.42$ ; EtOAc/pet. ether 33/67).  $\nu_{max}$  (ATR) 3375, 2971, 2879, 1716, 1491, 1173, 840  $\text{cm}^{-1}$ ;  $\delta_H$  (400 MHz,  $\text{CDCl}_3$ ) 5.68 (1H, ddt,  $J$  17.0, 9.7, 7.2, 4- $H$ ), 5.17–5.08 (2H, m, 5- $H_2$ ), 5.03 (1H, br d,  $J$  6.2,  $NH$ ), 4.37 (1H, dd,  $J$  13.3, 6.2, 2- $H$ ), 3.72 (3H, s,  $\text{OCH}_3$ ), 2.61–2.39 (2H, m, 3- $H_2$ ), 1.42 (9H, s,  $\text{C}(\text{CH}_3)_3$ );  $\delta_C$  (126 MHz,  $\text{CDCl}_3$ ) 171.2, 155.3, 132.4, 119.1, 79.9, 52.3, 36.9, 28.4;  $m/z$  ( $\text{ES}^+$ ) 253.0 [ $\text{M}+\text{Na}$ ] $^+$   $\text{C}_{11}\text{H}_{19}\text{O}_2\text{N}_1^{23}\text{Na}_1$  (Expected: 253.1).

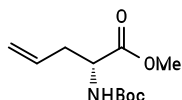

**S10 (R)-Methyl 2-((tert-butoxycarbonyl)amino)pent-4-enoate**<sup>13, 14</sup>

Procedure:<sup>15</sup> A mixture of the starting material S08 (690 mg, 2.35 mmol) and 4N HCl (3.0 ml, excess) in MeOH (10 ml) was refluxed for 1 hr. The reaction mixture was allowed to cool down to room temperature. The reaction mixture was extracted by ether (2 × 5 ml). The ether layer was discarded and the aqueous layer was basified by  $\text{NaHCO}_3$  to pH 8 followed by addition of  $\text{Boc}_2\text{O}$  (Boc anhydride) (775 mg, 3.53 mmol, 1.5 eq.) and the reaction was stirred for 2 hrs at room temperature and monitored by TLC. The reaction volume was reduced under vacuum and extracted with EtOAc (3 × 10 ml). The combined organic extracts were washed with brine, dried over  $\text{MgSO}_4$ , filtered and evaporated in vacuo to afford the crude product. Column chromatography on silica gel (from 20% to 50% ethyl acetate in pet. ether) gave S10 (408 g, 1.78 mmol, 75%) as viscous liquid ( $R_f \approx 0.42$ ; EtOAc/pet. ether 33/67).  $\nu_{max}$  (ATR) 3375, 2971, 2879, 1716, 1491, 1173, 840  $\text{cm}^{-1}$ ;  $\delta_H$  (400 MHz,  $\text{CDCl}_3$ ) 5.68 (1H, ddt,  $J$  17.0, 9.7, 7.2, 4- $H$ ), 5.17–5.08 (2H, m, 5- $H_2$ ), 5.03 (1H, br d,  $J$  6.2,  $NH$ ), 4.37 (1H, dd,  $J$  13.3, 6.2, 2- $H$ ), 3.72 (3H, s,  $\text{OCH}_3$ ), 2.61–2.39 (2H, m, 3- $H_2$ ), 1.42 (9H, s,  $\text{C}(\text{CH}_3)_3$ );  $\delta_C$  (126 MHz,  $\text{CDCl}_3$ ) 171.2, 155.3, 132.4, 119.1, 79.9, 52.3, 36.9, 28.4;  $m/z$  ( $\text{ES}^+$ ) 253.1 [ $\text{M}+\text{Na}$ ] $^+$   $\text{C}_{11}\text{H}_{19}\text{O}_2\text{N}_1^{23}\text{Na}_1$  (Expected: 253.1).

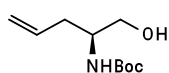

**25 (S)-tert-Butyl (1-hydroxypent-4-en-2-yl)carbamate**<sup>16</sup>

Procedure: A solution of S09 (332 mg, 1.45 mmol) in anhydrous ether (5 ml) was added dropwise to a stirred suspension of  $\text{LiAlH}_4$  (100 mg, 3.19 mmol, 2.2 eq.) in anhydrous ether (5 ml) at  $-0^\circ\text{C}$ . The reaction mixture was allowed to warm up to room temperature, was stirred for additional 1 hr and followed by TLC. Upon completion, the reaction was carefully quenched with dropwise addition of water (1 ml) followed by addition of 15% aq. NaOH (1 ml), water (3 ml), Celite and EtOAc (10 ml). The resulting slurry was filtered through Celite and the filtering bed was washed with EtOAc (2 × 5 ml). The two phases were separated and the organic layer was washed with brine, dried over  $\text{MgSO}_4$ , filtered and evaporated *in vacuo* to afford the crude product 25 (265 mg, 1.32 mmol, 91%) as a pale yellow oil ( $R_f \approx 0.25$ ; EtOAc/pet. ether 33/67). The product was pure enough and was used without further purification.  $\nu_{max}$  (ATR) 3375, 2971, 2879, 1716, 1491, 1173, 840  $\text{cm}^{-1}$ ;  $\delta_H$  (700 MHz,  $\text{CDCl}_3$ ) 5.78 (1H, ddt,  $J$  17.2, 10.2, 7.1, 4- $H$ ), 5.11 (2H, m, 5- $H_2$ ), 4.72 (1H, br s,  $NH$ ), 3.74–3.58 (3H, m, 1- $\text{CH}_2$  and 2- $H$ ), 2.67 (1H, br s,  $OH$ ),

2.31 (1H, m, 3-HH), 2.23 (1H, m, 3-HH), 1.43 (9H, s, C(CH<sub>3</sub>)<sub>3</sub>);  $\delta_{\text{C}}$  (101 MHz, CDCl<sub>3</sub>) 156.56, 134.28, 118.23, 79.89, 65.54, 52.30, 36.10, 28.49;  $m/z$  (ES<sup>+</sup>) 224.0 [M+Na]<sup>+</sup> C<sub>10</sub>H<sub>19</sub>O<sub>3</sub>N<sub>1</sub><sup>23</sup>Na<sub>1</sub> (Expected: 224.1).

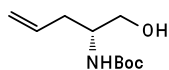

**24 (R)-tert-Butyl (1-hydroxypent-4-en-2-yl)carbamate<sup>16</sup>**

Procedure: A solution of S10 (388 mg, 1.69 mmol) in anhydrous ether (6 ml) was added dropwise to a stirred suspension of LiAlH<sub>4</sub> (102 mg, 3.72 mmol, 2.2 eq.) in anhydrous ether (6 ml) at -0 °C. The reaction mixture was allowed to warm up to room temperature, was stirred for additional 1 hr and followed by TLC. Upon completion, the reaction was carefully quenched with dropwise addition of water (1 ml) followed by addition of 15% aq. NaOH (1 ml), water (3 ml), Celite and EtOAc (12 ml). The resulting slurry was filtered through Celite and the filtering bed was washed with EtOAc (2 × 5 ml). The two phases were separated and the organic layer was washed with brine, dried over MgSO<sub>4</sub>, filtered and evaporated *in vacuo* to afford the crude product 24 (270 mg, 1.34 mmol, 79%) as a pale yellow oil ( $R_f \approx 0.25$ ; EtOAc/pet. ether 33/67). The product was pure enough and was used without further purification.  $\nu_{\text{max}}$  (ATR) 3375, 2971, 2879, 1716, 1491, 1173, 840 cm<sup>-1</sup>;  $\delta_{\text{H}}$  (700 MHz, CDCl<sub>3</sub>) 5.78 (1H, ddt,  $J$  17.2, 10.2, 7.1, 4-H), 5.11 (2H, m, 5-H<sub>2</sub>), 4.72 (1H, br s, NH), 3.74–3.58 (3H, m, 1-H<sub>2</sub> and 2-H), 2.67 (1H, br s, OH), 2.31 (1H, m, 3-HH), 2.23 (1H, m, 3-HH), 1.43 (9H, s, C(CH<sub>3</sub>)<sub>3</sub>)  $\delta_{\text{C}}$  (101 MHz, CDCl<sub>3</sub>) 156.56 (NHCOO), 134.28, 118.23, 79.89, 65.54, 52.30, 36.10, 28.49;  $m/z$  (ES<sup>+</sup>) 224.0 [M+Na]<sup>+</sup> C<sub>10</sub>H<sub>19</sub>O<sub>3</sub>N<sub>1</sub><sup>23</sup>Na<sub>1</sub> (Expected: 224.1).

## Olefin Cross Metathesis

To a solution of Grubbs II (0.3% mol) in CH<sub>2</sub>Cl<sub>2</sub>, the starting material was added as a solution in CH<sub>2</sub>Cl<sub>2</sub> followed by the addition of the coupling olefin in excess (5 eq.). The reaction mixture was refluxed, typically for 4~8 hrs. The reaction was followed by TLC and quenched by addition of potassium 2-isocyanoacetate (1.32% mol, 4.4 eq. to Grubbs catalyst).<sup>17</sup> The reaction was stirred for 15 min at room temperature then evaporated *in vacuo* to yield the crude mixture which was purified by column chromatography on silica.<sup>2</sup>

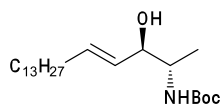

### 18a tert-Butyl ((2S,3R,E)-3-hydroxyoctadec-4-en-2-yl)carbamate

Yield (52%);  $\nu_{max}$  (ATR) 3375, 2971, 2879, 1716, 1491, 1173, 840 cm<sup>-1</sup>;  $\delta_H$  (700 MHz, CDCl<sub>3</sub>) 5.75–5.66 (1H, m, 5-*H*), 5.43 (1H, dd, *J* 15.5, 6.6, 4-*H*), 4.68–4.60 (1H, m, *NH*), 4.14–4.06 (1H, m, 3-*H*), 3.83–3.75 (1H, m, 2-*H*), 2.07–2.01 (2H, m, 6-*H*<sub>2</sub>), 1.44 (9H, s, C(CH<sub>3</sub>)<sub>3</sub>), 1.39–1.22 (22H, m, 7-*H*<sub>2</sub> to 17-*H*<sub>2</sub>), 1.07 (3H, d, *J* 6.4, 1-*H*<sub>3</sub>), 0.88 (3H, t, *J* 6.9, 18-*H*<sub>3</sub>);  $\delta_C$  (101 MHz, CDCl<sub>3</sub>) 156.3 (NHCOO), 134.2, 128.5, 79.8, 75.9, 32.5, 32.1, 29.9, 29.8, 29.8, 29.7, 29.6, 29.5, 29.3, 28.5, 22.8, 15.6, 14.3; *m/z* (ES<sup>+</sup>) 406.5 [M+Na]<sup>+</sup>; HRMS (ES<sup>+</sup>) found [M+H]<sup>+</sup> 384.3474, C<sub>23</sub>H<sub>46</sub>O<sub>3</sub>N<sub>1</sub> requires *M*<sup>+</sup> 384.3472.

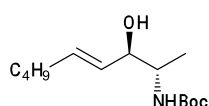

### 18b tert-Butyl ((2S,3R,E)-3-hydroxynon-4-en-2-yl)carbamate

Yield (67%);  $\nu_{max}$  (ATR) 3375, 2971, 2879, 1716, 1491, 1173, 840 cm<sup>-1</sup>;  $\delta_H$  (400 MHz, CDCl<sub>3</sub>) 5.76–5.65 (1H, m, 5-*H*), 5.42 (1H, ddt, *J* 15.4, 6.6, 1.4, 4-*H*), 4.74–4.61 (1H, m, *NH*), 4.13–4.05 (1H, m, 3-*H*), 3.84–3.72 (1H, m, 2-*H*), 2.01–2.07 (2H, m, 6-*H*<sub>2</sub>), 1.43 (9H, s, C(CH<sub>3</sub>)<sub>3</sub>), 1.40–1.25 (4H, m, 7-*H*<sub>2</sub> and 8-*H*<sub>2</sub>), 1.07 (3H, d, *J* 6.9, 1-*H*<sub>3</sub>), 0.88 (3H, t, *J* 7.1, 9-*H*<sub>3</sub>);  $\delta_C$  (101 MHz, CDCl<sub>3</sub>) 156.4, 134.1, 128.6, 79.7, 75.9, 51.2, 32.1, 31.5, 28.5, 22.3, 15.7, 14.0; *m/z* (ES<sup>+</sup>) 280.0 [M+Na]<sup>+</sup>; C<sub>14</sub>H<sub>27</sub>O<sub>3</sub>N<sub>1</sub>Na<sub>1</sub>; HRMS (ES<sup>+</sup>) found [M+H]<sup>+</sup> 258.2064, C<sub>14</sub>H<sub>28</sub>O<sub>3</sub>N<sub>1</sub> requires *M*<sup>+</sup> 258.2064, [M+Na]<sup>+</sup> 280.1884, C<sub>14</sub>H<sub>27</sub>O<sub>3</sub>N<sub>1</sub><sup>23</sup>Na<sub>1</sub> requires *M*<sup>+</sup> 280.1883.

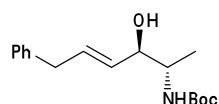

**18c tert-Butyl ((2S,3R,E)-3-hydroxy-6-phenylhex-4-en-2-yl)carbamate**

Yield (64%) as viscous oil;  $\nu_{max}$  (ATR) 3375, 2971, 2879, 1716, 1491, 1173, 840  $\text{cm}^{-1}$ ;  $\delta_H$  (400 MHz,  $\text{CDCl}_3$ ) 7.32–7.24 (2H, m, ArH), 7.23–7.14 (3H, m, ArH), 5.93–5.83 (1H, m, 5-H), 5.53 (1H, ddt,  $J$  15.3, 6.3, 1.4, 4-H), 4.74–4.66 (1H, m, NH), 4.19–4.13 (1H, m, 3-H), 3.86–3.73 (1H, m, 2-H), 3.40 (2H, d,  $J$  6.8, 6-H<sub>2</sub>), 1.44 (9H, s, C(CH<sub>3</sub>)<sub>3</sub>), 1.08 (3H, d,  $J$  6.9, 1-H<sub>3</sub>);  $\delta_C$  (101 MHz,  $\text{CDCl}_3$ ) 156.4, 140.1, 132.2, 130.2, 128.6, 128.9, 126.3, 79.8, 75.6, 51.2, 38.9, 28.5, 15.6;  $m/z$  (ES<sup>+</sup>) 314.3 [M+Na]<sup>+</sup>; C<sub>17</sub>H<sub>25</sub>O<sub>3</sub>N<sub>1</sub>Na<sub>1</sub>; HRMS (ES<sup>+</sup>) found [M+H]<sup>+</sup> 292.1908, C<sub>17</sub>H<sub>26</sub>O<sub>3</sub>N<sub>1</sub> requires  $M^+$  292.1907.

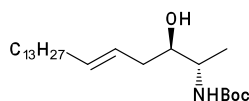

**21a tert-Butyl ((2S,3R,E)-3-hydroxynonadec-5-en-2-yl)carbamate**

Yield (53%);  $\nu_{max}$  (ATR) 3375, 2971, 2879, 1716, 1491, 1173, 840  $\text{cm}^{-1}$ ;  $\delta_H$  (700 MHz,  $\text{CDCl}_3$ ) 5.55 (1H, dt,  $J$  12.8, 6.7, 6-H), 5.43–5.36 (1H, m, 5-H), 4.83–4.68 (1H, m, NH), 3.73–3.58 (2H, m, 3-H and 2-H), 3.48 (1H, d,  $J$  7.8, OH), 2.27–2.15 (4H, m, 4-H<sub>2</sub> and 7-H<sub>2</sub>), 2.14–1.98 (2H, m, 7-H<sub>2</sub>), 1.44 (9H, s, C(CH<sub>3</sub>)<sub>3</sub>), 1.38–1.22 (94 H, m, 8-H<sub>2</sub> to 18-H<sub>2</sub> and 1-H<sub>3</sub>), 0.88 (3H, t,  $J$  7.1, 19-H<sub>3</sub>);  $\delta_C$  (126 MHz,  $\text{CDCl}_3$ ) 156.24, 135.03, 125.50, 79.56, 73.69, 50.35, 37.46, 32.88, 32.15, 29.90, 29.88, 29.85, 29.73, 29.66, 29.58, 29.45, 29.44, 28.63, 22.92, 14.35;  $m/z$  (ES<sup>+</sup>) 398.5 [M+H]<sup>+</sup>; HRMS (ES<sup>+</sup>) found [M+H]<sup>+</sup> 398.3627, C<sub>24</sub>H<sub>48</sub>O<sub>3</sub>N<sub>1</sub> requires  $M^+$  398.3629; [M+Na]<sup>+</sup> 420.3446, C<sub>24</sub>H<sub>47</sub>O<sub>3</sub>N<sub>1</sub><sup>23</sup>Na<sub>1</sub> requires  $M^+$  420.3448.

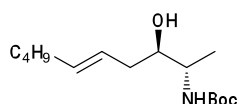

**21b tert-Butyl ((2S,3R,E)-3-hydroxydec-5-en-2-yl)carbamate**

Yield (56%); waxy solid;  $\nu_{max}$  (ATR) 3449, 2928, 1715, 1497, 1173, 839  $\text{cm}^{-1}$ ;  $\delta_H$  (400 MHz,  $\text{CDCl}_3$ ) 5.55 (1H, dt,  $J$  13.2, 6.6, 6-CH), 5.43–5.34 (1H, m, 5-H), 4.83–4.70 (1H, m, NH), 3.74–3.58 (2H, m, 2-H and 3-H), 2.23–1.96 (4H, m, 4-H<sub>2</sub> and 7-H<sub>2</sub>), 1.44 (9H, s, C(CH<sub>3</sub>)<sub>3</sub>), 1.39–1.23 (4H, m, 8-H<sub>2</sub> and 9-H<sub>2</sub>), 1.15–1.02 (3H, d,  $J$  6.8, 1-H<sub>3</sub>), 0.89 (3H, t,  $J$  7.1, 10-H<sub>3</sub>);  $\delta_C$  (101 MHz,  $\text{CDCl}_3$ ) 156.0, 134.8, 125.6, 79.6, 73.5, 50.4, 37.2, 32.3, 31.6, 28.4, 22.2, 13.9;  $m/z$  (ES<sup>+</sup>) 294.3 [M+Na]<sup>+</sup>; HRMS (ES<sup>+</sup>) found [M+H]<sup>+</sup> 272.2220, C<sub>15</sub>H<sub>30</sub>O<sub>3</sub>N<sub>1</sub> requires  $M^+$  272.2220; [M+Na]<sup>+</sup> 294.2040, C<sub>15</sub>H<sub>29</sub>O<sub>3</sub>N<sub>1</sub><sup>23</sup>Na<sub>1</sub> requires  $M^+$  294.2040.



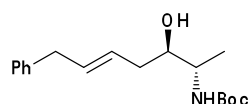

**21c tert-Butyl ((2S,3R,E)-3-hydroxy-7-phenylhept-5-en-2-yl)carbamate**

Yield (64%) as viscous oil;  $\nu_{max}$  (ATR) 3375, 2971, 2879, 1716, 1491, 1173, 840  $\text{cm}^{-1}$ ;  $\delta_H$  (700 MHz,  $\text{CDCl}_3$ ) 7.30–7.27 (2H, m, ArH), 7.21–7.15 (3H, m, ArH), 5.71 (1H, dtd,  $J$  15.2, 11.8, 6.6, 6-H), 5.53 (1H, dd,  $J$  15.2, 6.3, 5-H), 4.80 (1H, br s, NH), 3.75–3.62 (2H, m, 3-H and 2-H), 3.36 (2H, d,  $J$  6.6, 7-H<sub>2</sub>), 2.24–2.05 (2H, m, 4-H<sub>2</sub>), 1.44 (9H, s, C(CH<sub>3</sub>)<sub>3</sub>), 1.10 (3H, d,  $J$  6.8, 1-H<sub>3</sub>);  $\delta_C$  (176 MHz,  $\text{CDCl}_3$ ) 155.88, 140.56, 135.89, 133.24, 128.57, 127.42, 126.16, 79.58, 73.75, 50.37, 39.23, 39.22, 37.17, 28.55, 14.72;  $m/z$  (ES<sup>+</sup>) 328.3 [M+Na]<sup>+</sup>; HRMS (ES<sup>+</sup>) found [M+H]<sup>+</sup> 306.2063, C<sub>18</sub>H<sub>28</sub>O<sub>3</sub>N<sub>1</sub> requires  $M^+$  306.2064; [M+Na]<sup>+</sup> 328.1883, C<sub>18</sub>H<sub>27</sub>O<sub>3</sub>N<sub>1</sub><sup>23</sup>Na<sub>1</sub> requires  $M^+$  328.1883.

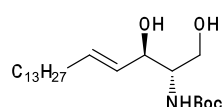

**17a tert-Butyl ((2S,3R,E)-1,3-dihydroxyoctadec-4-en-2-yl)carbamate<sup>2</sup>**

Yield (44%, 50%);  $\nu_{max}$  (ATR) 3410, 2886, 2874, 1687, 1512, 1173  $\text{cm}^{-1}$ ;  $\delta_H$  (400 MHz,  $\text{CDCl}_3$ ) 5.83–5.73 (1H, m, 5-H), 5.53 (1H, dtd,  $J$  15.6, 6.5, 1.2, 4-H), 5.30 (1H, br d,  $J$  6.4, NH), 4.38–4.28 (1H, m, 3-H), 3.94 (1H, app. d,  $J$  10.0, 1-HH), 3.76–3.67 (1H, m, 1-HH), 3.63–3.54 (1H, m, 2-H), 2.50 (2H, br s, 2 × OH), 2.05 (2H, q,  $J$  7.3, 6-H), 1.45 (9H, s, C(CH<sub>3</sub>)<sub>3</sub>), 1.42–1.18 (22H, m, 7-H<sub>2</sub> to 17-H<sub>2</sub>), 0.88 (3H, t,  $J$  6.9, 18-H<sub>3</sub>);  $\delta_C$  (101 MHz,  $\text{CDCl}_3$ ) 158.1, 134.2, 128.9, 79.7, 74.9, 62.9, 56.0, 32.3, 31.9, 29.8, 29.6, 29.5, 29.3, 29.1, 29.1, 28.4, 22.6, 14.1;  $m/z$  (ES<sup>+</sup>) 400.9 [M+H]<sup>+</sup>; HRMS (ES<sup>+</sup>) found [M+H]<sup>+</sup> 400.3419, C<sub>23</sub>H<sub>46</sub>O<sub>4</sub>N<sub>1</sub> requires  $M^+$  400.3421, [M+Na]<sup>+</sup> 422.3238, C<sub>23</sub>H<sub>45</sub>O<sub>4</sub>N<sub>1</sub><sup>23</sup>Na<sub>1</sub> requires  $M^+$  422.3241.

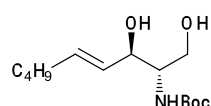

**17b tert-Butyl ((2S,3R,E)-1,3-dihydroxynon-4-en-2-yl)carbamate**

Yield (59%, 57%);  $\nu_{max}$  (ATR) 3375, 2971, 2879, 1716, 1491, 1173, 840  $\text{cm}^{-1}$ ;  $\delta_H$  (400 MHz,  $\text{CDCl}_3$ ) 5.76 (1H, dtd,  $J$  15.4, 6.7, 1.1, 5-H), 5.51 (1H, dtd,  $J$  15.4, 6.5, 1.3, 4-H), 5.32 (1H, br d, NH), 4.34–4.21 (1H, m, 3-H), 3.90 (1H, d,  $J$  11.4, 1-HH), 3.68 (1H, d,  $J$  11.0, 1-HH), 3.63–3.51 (1H, m, 2-H), 2.97 (2H, br s, 2 × OH), 2.05 (2H, dd,  $J$  13.8, 6.7, 6-H<sub>2</sub>), 1.44 (9H, s, C(CH<sub>3</sub>)<sub>3</sub>), 1.39–1.23 (4H, m, 7-H<sub>2</sub> and 8-H<sub>2</sub>), 0.88 (3H, t,  $J$  7.1, 9-H<sub>3</sub>);  $\delta_C$  (101 MHz,  $\text{CDCl}_3$ ) 156.4, 134.2, 129.1, 79.9, 74.8, 62.8, 55.6, 32.1, 31.4, 28.5, 22.3, 14.0;  $m/z$  (ES<sup>+</sup>) 274.6 [M+H]<sup>+</sup>; HRMS (ES<sup>+</sup>) found [M+H]<sup>+</sup> 274.2012, C<sub>14</sub>H<sub>28</sub>O<sub>4</sub>N<sub>1</sub> requires  $M^+$  274.2013, [M+Na]<sup>+</sup> 296.1831, C<sub>14</sub>H<sub>27</sub>O<sub>4</sub>N<sub>1</sub><sup>23</sup>Na<sub>1</sub> requires  $M^+$  296.1832.

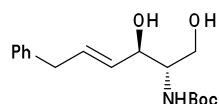

**17c** *tert*-Butyl ((2*S*,3*R*,*E*)-1,3-dihydroxy-6-phenylhex-4-en-2-yl)carbamate

Yield (62%, 43%);  $\nu_{max}$  (ATR) 3375, 2971, 2879, 1716, 1491, 1173, 840  $\text{cm}^{-1}$ ;  $\delta_H$  (400 MHz,  $\text{CDCl}_3$ ) 7.32–7.26 (2H, m, ArH), 7.23–7.19 (1H, m, ArH), 7.18–7.14 (2H, m, ArH), 6.00–5.90 (1H, m, 5-H), 5.61 (1H, dd,  $J$  15.4, 6.2, 4-H), 5.30 (1H, br s, NH), 4.40–4.32 (1H, m, 3-H), 3.93 (1H, dd,  $J$  11.2, 3.5, 1-HH), 3.71 (1H, dd,  $J$  11.4, 3.5, 1-HH), 3.67–3.58 (1H, m, 2-H), 3.40 (2H, d,  $J$  6.8, 6-H), 2.71–2.44 (2H, br m, 2  $\times$  OH), 1.45 (9H, s,  $\text{C}(\text{CH}_3)_3$ );  $\delta_C$  (125 MHz,  $\text{CDCl}_3$ ) 156.7, 139.3, 132.8, 130.7, 128.66, 128.62, 126.4, 80.7, 74.8, 62.8, 38.8, 28.5;  $m/z$  ( $\text{ES}^+$ ) 329.9 [ $\text{M}+\text{Na}$ ] $^+$ ; HRMS ( $\text{ES}^+$ ) found [ $\text{M}+\text{H}$ ] $^+$  308.1855,  $\text{C}_{17}\text{H}_{26}\text{O}_4\text{N}_1$  requires  $M^+$  308.1856, [ $\text{M}+\text{Na}$ ] $^+$  330.1673,  $\text{C}_{17}\text{H}_{25}\text{O}_4\text{N}_1^{23}\text{Na}_1$  requires  $M^+$  330.1676.

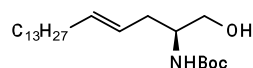

**27a** (*S*,*E*)-*tert*-Butyl (1-hydroxyoctadec-4-en-2-yl)carbamate<sup>18</sup>

Yield (53%);  $\nu_{max}$  (ATR) 3375, 2971, 2879, 1716, 1491, 1173, 840  $\text{cm}^{-1}$ ;  $\delta_H$  (400 MHz,  $\text{CDCl}_3$ ) 5.52 (1H, dt,  $J$  13.4, 6.7, 5-H), 5.41–5.27 (1H, m, 4-H), 4.66 (1H, br s, NH), 3.73–3.48 (3H, m, 1- $H_2$  and 2-H), 2.57 (1H, br s, OH), 2.33–2.10 (2H, m, 3- $H_2$ ), 2.00 (2H, dt,  $J$  14.0, 6.7, 6- $H_2$ ), 1.44 (9H, s,  $\text{C}(\text{CH}_3)_3$ ), 1.39–1.14 (22H, m), 0.88 (3H, t,  $J$  6.8, 18- $H_3$ );  $\delta_C$  (101 MHz,  $\text{CDCl}_3$ ) 155.98, 134.82, 125.20, 79.85, 65.99, 52.74, 34.89, 32.73, 32.07, 29.84, 29.81, 29.78, 29.66, 29.54, 29.51, 29.32, 28.51, 22.84, 14.28;  $m/z$  ( $\text{ES}^+$ ) 384.9 [ $\text{M}+\text{H}$ ] $^+$ ; HRMS ( $\text{ES}^+$ ) found [ $\text{M}+\text{H}$ ] $^+$  384.3470,  $\text{C}_{23}\text{H}_{46}\text{O}_3\text{N}_1$  requires  $M^+$  384.2472, [ $\text{M}+\text{Na}$ ] $^+$  406.3288,  $\text{C}_{23}\text{H}_{45}\text{O}_3\text{N}_1^{23}\text{Na}_1$  requires  $M^+$  406.3292.

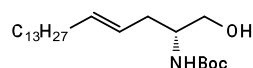

**26a** (*R*,*E*)-*tert*-Butyl (1-hydroxyoctadec-4-en-2-yl)carbamate<sup>18</sup>

Yield (62%);  $\nu_{max}$  (ATR) 3375, 2971, 2879, 1716, 1491, 1173, 840  $\text{cm}^{-1}$ ;  $\delta_H$  (400 MHz,  $\text{CDCl}_3$ ) 5.52 (1H, dtt,  $J$  15.4, 6.6, 1.0, 5-H), 5.35 (1H, dtt,  $J$  15.4, 7.1, 1.3, 4-H), 4.66 (1H, br s, NH), 3.70–3.53 (3H, m, 1- $H_2$  and 2-H), 2.57 (1H, br s, OH), 2.30–2.11 (2H, m, 3- $H_2$ ), 1.99 (2H, dd,  $J$  13.7, 6.7, 6- $H_2$ ), 1.44 (9H, s,  $\text{OC}(\text{CH}_3)_3$ ), 1.36–1.22 (22H, m, 7- $H_2$  to 17- $H_2$ ), 0.88 (3H, t,  $J$  6.9, 18- $H_3$ );  $\delta_C$  (101 MHz,  $\text{CDCl}_3$ ) 155.98, 134.82, 125.20, 79.85, 65.99, 52.74, 34.89, 32.73, 32.07, 29.84, 29.81, 29.78, 29.66, 29.54, 29.51, 29.32, 28.51, 22.84, 14.28;  $m/z$  ( $\text{ES}^+$ ) 384.9 [ $\text{M}+\text{H}$ ] $^+$ ; HRMS ( $\text{ES}^+$ ) found [ $\text{M}+\text{H}$ ] $^+$  384.3470,  $\text{C}_{23}\text{H}_{46}\text{O}_3\text{N}_1$  requires  $M^+$  384.2472, [ $\text{M}+\text{Na}$ ] $^+$  406.3288,  $\text{C}_{23}\text{H}_{45}\text{O}_3\text{N}_1^{23}\text{Na}_1$  requires  $M^+$  406.3292.

## General procedure for BOC de-protection - Acylation Reactions

To a solution of the *N*-Boc protected starting material in CH<sub>2</sub>Cl<sub>2</sub>, TFA (excess) was added dropwise at room temperature and the reaction was monitored by TLC. Typically the reaction was complete in less than 1 hr. The reaction mixture was dried on the rotary evaporator to remove the excess TFA. The resulting residue (unprotected amine) was dissolved in CH<sub>2</sub>Cl<sub>2</sub> (2 ml) and basified to pH 8 with aq. NaHCO<sub>3</sub> followed by the addition of the corresponding acid chloride (1.2 eq.). The reaction was monitored by TLC. Upon completion, the reaction was diluted with sat. aq. NH<sub>4</sub>Cl. The phases were separated and the aqueous layer was extracted with twice CH<sub>2</sub>Cl<sub>2</sub>. The combined organic extracts were washed with brine, dried on anhydrous MgSO<sub>4</sub> and evaporated to yield the crude product. Assessment of the crude product purity was based on crude <sup>1</sup>H NMR. Compounds that were ≥80% pure were used as they soon as produced. Others were purified by standard column chromatography. All compounds used in the screening were characterised as an array (<sup>1</sup>H NMR and Mass Spectrometry data).

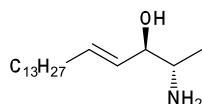

### 18an (2S,3R,E)-2-aminooctadec-4-en-3-ol

Yield (62%);  $\delta_{\text{H}}$  (400 MHz, CDCl<sub>3</sub>) 7.80 (2H, br s, NH<sub>2</sub>), 5.77 (1H, dt, *J* 15.2, 6.4, 5-*H*), 5.37 (1H, dd, *J* 15.2, 6.1, 4-*H*), 4.41–4.24 (1H, m, 3-*H*), 3.40–3.28 (2H, m, 2-*H* and OH), 2.02 (2H, dd, *J* 13.7, 6.7, 6-*H*<sub>2</sub>), 1.29–1.21 (25H, m, 7-*H*<sub>2</sub> to 17-*H*<sub>2</sub> and 1-*H*<sub>3</sub>), 0.87 (3H, t, *J* 6.8, 18-*H*<sub>3</sub>); *m/z* (ES<sup>+</sup>) 284.3 [M+H]<sup>+</sup>; HRMS (ES<sup>+</sup>) found [M+H]<sup>+</sup> 284.2947, C<sub>18</sub>H<sub>38</sub>O<sub>3</sub>N<sub>1</sub> requires *M*<sup>+</sup> 284.2948.

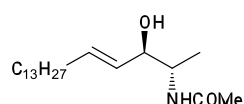

### 18az N-((2S,3R,E)-3-hydroxyoctadec-4-en-2-yl)acetamide

Yield (80%);  $\delta_{\text{H}}$  (400 MHz, CDCl<sub>3</sub>) 5.75–5.66 (1H, m, 5-*H*), 5.60 (1H, d, *J* 2.4, NH), 5.48–5.35 (1H, m, 4-*H*), 4.12 (1H, dd, *J* 6.7, 3.2, 3-*H*), 4.10–4.04 (1H, m, 2-*H*), 2.11–1.95 (5H, m, 6-*H*<sub>2</sub> and COCH<sub>3</sub>), 1.40–1.11 (22H, m, 7-*H*<sub>2</sub> to 18-*H*<sub>2</sub>), 1.08 (3H, d, *J* 6.9, 1-*H*<sub>3</sub>), 0.87 (3H, t, *J* 6.8, 18-*H*<sub>3</sub>); *m/z* (ES<sup>+</sup>) 348.4 [M+Na]<sup>+</sup>; HRMS (ES<sup>+</sup>) found [M+Na]<sup>+</sup> 348.2871, C<sub>20</sub>H<sub>39</sub>O<sub>2</sub>N<sub>1</sub><sup>23</sup>Na<sub>1</sub> requires *M*<sup>+</sup> 348.2873.

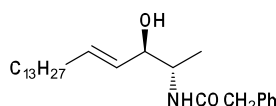

### 18ay N-((2S,3R,E)-3-hydroxyoctadec-4-en-2-yl)-2-phenylacetamide

Yield (22%);  $\delta_{\text{H}}$  (400 MHz, CDCl<sub>3</sub>) 7.39–7.23 (5H, m, Ar*H*), 5.64 (1H, dtd, *J* 15.0, 7.0, 0.9, 5-*H*), 5.51 (1H, br d, NH), 5.31 (1H, dd, *J* 15.0, 6.3, 4-*H*), 4.13–4.03 (2H, m, 3-*H* and 2-*H*), 3.58 (2H, s, PhCH<sub>2</sub>), 1.98 (2H, dd, *J* 13.8, 7.0, 6-*H*<sub>2</sub>), 1.39–1.18 (22H, m, 7-*H*<sub>2</sub> to 17-*H*<sub>2</sub>), 1.01 (3H, d, *J* 6.8, 1-*H*<sub>3</sub>), 0.88 (3H, t, *J* 6.9, 18-*H*<sub>3</sub>); *m/z* (ES<sup>+</sup>) 424.5 [M+Na]<sup>+</sup>; HRMS (ES<sup>+</sup>) found [M+Na]<sup>+</sup> 424.3182, C<sub>26</sub>H<sub>43</sub>O<sub>2</sub>N<sub>1</sub><sup>23</sup>Na<sub>1</sub> requires *M*<sup>+</sup> 424.3186.

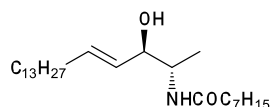

**18ax N-((2S,3R,E)-3-hydroxyoctadec-4-en-2-yl)octanamide**

Yield (41%);  $\delta_{\text{H}}$  (400 MHz,  $\text{CDCl}_3$ ) 5.71 (1H, dtd,  $J$  14.9, 6.7, 1.1, 5- $H$ ), 5.43 (1H, dtd,  $J$  15.4, 6.6, 1.4, 4- $H$ ), 4.64 (1H, br s, NH), 4.14–4.06 (1H, m, 3- $H$ ), 3.85–3.72 (1H, m, 2- $H$ ), 2.56 (1H, br s, OH), 2.04 (2H, dd,  $J$  14.9, 7.0, 6- $H_2$ ), 1.40–1.20 (22 H, m, 7- $H_2$  to 17- $H_2$ ), 1.07 (3H, d,  $J$  6.9, 1- $H_3$ ), 0.88 (3H, t,  $J$  6.9, 18- $H_3$ );  $m/z$  ( $\text{ES}^+$ ) 432.6  $[\text{M}+\text{Na}]^+$ ; HRMS ( $\text{ES}^+$ ) found  $[\text{M}+\text{Na}]^+$  432.3806,  $\text{C}_{26}\text{H}_{51}\text{O}_2\text{N}_1^{23}\text{Na}_1$  requires  $M^+$  432.3812.

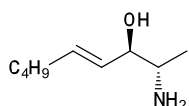

**18bn (2S,3R,E)-2-aminonon-4-en-3-ol**

Yield (73%);  $\delta_{\text{H}}$  (400 MHz,  $\text{CDCl}_3$ ) 5.79–5.69 (1H, m, 5- $H$ ), 5.39 (1H, dd,  $J$  14.9, 5.3, 4- $H$ ), 5.30 (2H, br s,  $\text{NH}_2$ ), 4.32–4.24 (1H, m, 3- $H$ ), 3.33–3.21 (1H, m, 2- $H$ ), 2.03 (2H, dd,  $J$  12.8, 5.2, 6- $H_2$ ), 1.41–1.26 (4H, m, 7- $H_2$  and 8- $H_2$ ), 1.15 (1H, d,  $J$  6.5, 1- $H_3$ ), 0.88 (1H, t,  $J$  6.9, 9- $H_3$ );  $m/z$  ( $\text{ES}^+$ ) 158.1  $[\text{M}+\text{H}]^+$ ; HRMS ( $\text{ES}^+$ ) found  $[\text{M}+\text{Na}]^+$  158.1539,  $\text{C}_9\text{H}_{19}\text{O}_1\text{N}_1^{23}\text{Na}_1$  requires  $M^+$  158.1539.

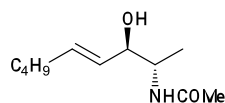

**18bz N-((2S,3R,E)-3-hydroxynon-4-en-2-yl)acetamide**

Yield (79%);  $\delta_{\text{H}}$  (400 MHz,  $\text{CDCl}_3$ ) 6.03 (1H, br s, NH), 5.74–5.62 (1H, m, 5- $H$ ), 5.41 (1H, dd,  $J$  15.3, 6.4, 4- $H$ ), 4.16–4.00 (1H, m, 3- $H$  and 2- $H$ ), 3.73 (1H, s, OH), 2.14–1.87 (5H, m, 6- $H_2$  and  $\text{COCH}_3$ ), 1.44–1.25 (4H, m, 7- $H_2$  and 8- $H_2$ ), 1.06 (1H, d,  $J$  6.8, 1- $H_3$ ), 0.88 (3H, t,  $J$  6.8, 9- $H_3$ );  $m/z$  ( $\text{ES}^+$ ) 222.2  $[\text{M}+\text{Na}]^+$ ; HRMS ( $\text{ES}^+$ ) found  $[\text{M}+\text{Na}]^+$  222.1463,  $\text{C}_{11}\text{H}_{21}\text{O}_2\text{N}_1^{23}\text{Na}_1$  requires  $M^+$  222.1465.

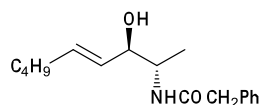

**18by N-((2S,3R,E)-3-hydroxynon-4-en-2-yl)-2-phenylacetamide**

Yield (50%);  $\delta_{\text{H}}$  (400 MHz,  $\text{CDCl}_3$ ) 7.35–7.22 (5H, m, ArH), 5.69–5.59 (1H, m, 5- $H$ ), 5.32 (1H, dd,  $J$  15.9, 6.3, 4- $H$ ), 4.19–3.98 (2H, m, 3- $H$  and 2- $H$ ), 3.56 (2H, s,  $\text{PhCH}_2$ ), 1.99 (2H, dd,  $J$  13.3, 6.6, 6- $H_2$ ), 1.34–1.21 (2H, m, 7- $H_2$  and 8- $H_2$ ), 1.01 (1H, d,  $J$  6.6, 1- $H_3$ ), 0.89 (1H, t,  $J$  6.5, 9- $H_3$ );  $m/z$  ( $\text{ES}^+$ ) 298.3  $[\text{M}+\text{Na}]^+$ ; HRMS ( $\text{ES}^+$ ) found  $[\text{M}+\text{Na}]^+$  298.1775,  $\text{C}_{17}\text{H}_{25}\text{O}_2\text{N}_1^{23}\text{Na}_1$  requires  $M^+$  298.1778.

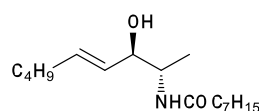

**18bx N-((2S,3R,E)-3-hydroxy-6-phenylhex-4-en-2-yl)octanamide**

Yield (23%);  $\delta_{\text{H}}$  (400 MHz,  $\text{CDCl}_3$ ) 5.76–5.67 (1H, m, 5-H), 5.63 (1H, br d,  $J$  7.7, NH), 5.41 (1H, dd,  $J$  15.5, 6.3, 4-H), 4.11 (2H, m, 3-H and 2-H), 2.20–2.15 (2H, m,  $\text{COCH}_2$ ), 2.10–2.02 (2H, m, 6- $H_2$ ), 1.66–1.58 (2H, m,  $\text{COCH}_2\text{CH}_2$ ), 1.39–1.22 (12H, m, 7- $H_2$ , 8- $H_2$  and 4  $\times$  octanoyl aliphatic  $\text{CH}_2$ ), 1.09 (3H, d,  $J$  6.8, 1- $H_3$ ), 0.92–0.85 (6H, m, 9- $H_3$  and octanoyl terminal  $\text{CH}_3$ );  $m/z$  ( $\text{ES}^+$ ) 306.4 [ $\text{M}+\text{Na}$ ] $^+$ ; HRMS ( $\text{ES}^+$ ) found [ $\text{M}+\text{Na}$ ] $^+$  306.2402,  $\text{C}_{17}\text{H}_{33}\text{O}_2\text{N}_1^{23}\text{Na}_1$  requires  $M^+$  306.2404.

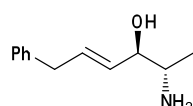

**18cn (2S,3R,E)-2-amino-6-phenylhex-4-en-3-ol**

Yield (77%);  $\delta_{\text{H}}$  (400 MHz,  $\text{CDCl}_3$ ) 7.85 (2H, br s,  $\text{NH}_2$ ), 7.29–7.23 (2H, m, ArH), 7.20–7.16 (1H, m, ArH), 7.14–7.11 (2H, m, ArH), 5.97–5.88 (1H, m, 5-H), 5.45 (1H, dd,  $J$  15.5, 6.2, 4-H), 4.48–4.39 (1H, m, 3-H), 3.43–3.37 (1H, m, 2-H), 3.35 (2H, d,  $J$  7.7, 6- $H_2$ ), 2.89 (1H, br s, OH), 1.19 (3H, d,  $J$  6.5, 1- $H_3$ );  $m/z$  ( $\text{ES}^+$ ) 192.2 [ $\text{M}+\text{H}$ ] $^+$ ; HRMS ( $\text{ES}^+$ ) found [ $\text{M}+\text{H}$ ] $^+$  192.1383,  $\text{C}_{12}\text{H}_{18}\text{O}_1\text{N}_1$  requires  $M^+$  192.1383.

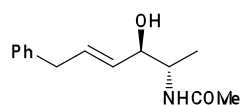

**18cz N-((2S,3R,E)-3-hydroxy-6-phenylhex-4-en-2-yl)acetamide**

Yield (67%);  $\delta_{\text{H}}$  (400 MHz,  $\text{CDCl}_3$ ) 7.31–7.27 (2H, m, ArH), 7.22–7.14 (3H, m, ArH), 5.98 (1H, br s, NH), 5.93–5.82 (1H, m, 5-H), 5.50 (1H, dd,  $J$  15.3, 6.2, 4-H), 4.21–4.13 (1H, m, 3-H), 4.06 (1H, dt,  $J$  8.0, 4.0, 2-H), 3.38 (1H, d,  $J$  6.7, 6- $H_2$ ), 2.85 (2H, br s, OH), 1.94 (3H, s,  $\text{COCH}_3$ ), 1.08 (3H, d,  $J$  6.9, 1- $H_3$ );  $m/z$  ( $\text{ES}^+$ ) 256.3 [ $\text{M}+\text{Na}$ ] $^+$ ; HRMS ( $\text{ES}^+$ ) found [ $\text{M}+\text{Na}$ ] $^+$  256.1307,  $\text{C}_{14}\text{H}_{19}\text{O}_2\text{N}_1^{23}\text{Na}_1$  requires  $M^+$  256.1308.

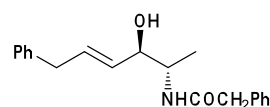

**18cy N-((2S,3R,E)-3-hydroxy-6-phenylhex-4-en-2-yl)-2-phenylacetamide**

Yield (87%);  $\delta_{\text{H}}$  (400 MHz,  $\text{CDCl}_3$ ) 7.35–7.10 (10H, m, ArH), 5.91 (1H, br s, NH), 5.86–5.77 (1H, m, 5-H), 5.40 (1H, dd,  $J$  15.4, 6.0, 4-H), 4.18–3.96 (1H, m, 3-H), 3.60–3.49 (1H, m, 2-H), 3.42 (2H, s,  $\text{COCH}_2$ ), 3.32 (2H, d,  $J$  6.7, 6- $H_2$ ), 1.01 (3H, d,  $J$  6.8, 1- $H_3$ );  $m/z$  ( $\text{ES}^+$ ) 332.3 [ $\text{M}+\text{Na}$ ] $^+$ ; HRMS ( $\text{ES}^+$ ) found [ $\text{M}+\text{Na}$ ] $^+$  332.1618,  $\text{C}_{20}\text{H}_{23}\text{O}_2\text{N}_1^{23}\text{Na}_1$  requires  $M^+$  332.1621.

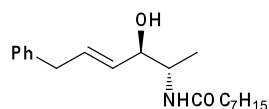

**18cx N-((2S,3R,E)-3-hydroxy-6-phenylhex-4-en-2-yl)octanamide**

Yield (90%);  $\delta_{\text{H}}$  (400 MHz,  $\text{CDCl}_3$ ) 7.31–7.24 (2H, m, ArH), 7.22–7.12 (3H, m, ArH), 5.95–5.82 (2H, m, 5-H and NH), 5.50 (1H, dd,  $J$  15.4, 6.2, 4-H), 4.20–4.03 (2H, m, 3-H and 2-H), 3.38 (1H, d,  $J$  6.7, 6-H<sub>2</sub>), 2.17–2.10 (2H, m, COCH<sub>2</sub>), 1.66–1.51 (2H, m, COCH<sub>2</sub>CH<sub>2</sub>), 1.32–1.20 (8H, m, 4 × CH<sub>2</sub>), 1.08 (3H, d,  $J$  6.8, 1-H<sub>3</sub>), 0.87 (3H, t,  $J$  6.8, octanoyl terminal CH<sub>3</sub>);  $m/z$  (ES<sup>+</sup>) 318.2 [M+H]<sup>+</sup>, 340.4 [M+Na]<sup>+</sup>; HRMS (ES<sup>+</sup>) found [M+H]<sup>+</sup> 318.2431, C<sub>20</sub>H<sub>32</sub>O<sub>2</sub>N<sub>1</sub> requires  $M^+$  318.2428.

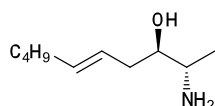

**21bn (2S,3R,E)-2-aminodec-5-en-3-ol**

Yield (79%);  $\delta_{\text{H}}$  (400 MHz,  $\text{CDCl}_3$ ) 5.62–5.45 (1H, m, 6-H), 5.41–5.26 (1H, m, 5-H), 5.14 (1H, br s, NH<sub>2</sub>), 3.83–3.71 (1H, m, 2-H), 3.31–3.13 (1H, m, 3-H), 2.27–1.93 (4H, m, 4-H<sub>2</sub> and 7-H<sub>2</sub>), 1.33–1.29 (4H, m, 8-H<sub>2</sub> and 9-H<sub>2</sub>), 1.16 (3H, d,  $J$  6.1, 1-H<sub>3</sub>), 0.87 (3H, t,  $J$  7.0, 10-H<sub>3</sub>);  $m/z$  (ES<sup>+</sup>) 172.3 [M+H]<sup>+</sup>, 194.3 [M+Na]<sup>+</sup>; HRMS (ES<sup>+</sup>) found [M+H]<sup>+</sup> 172.1696, C<sub>10</sub>H<sub>22</sub>O<sub>1</sub>N<sub>1</sub> requires  $M^+$  172.1696.

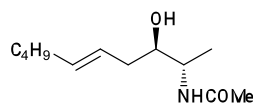

**21bz N-((2S,3R,E)-3-hydroxydec-5-en-2-yl)acetamide**

Yield (70%);  $\delta_{\text{H}}$  (400 MHz,  $\text{CDCl}_3$ ) 5.88 (1H, br s, NH), 5.55 (1H, dt,  $J$  13.4, 6.6, 6-H), 5.44–5.34 (1H, m, 5-H), 4.01 (1H, ddd,  $J$  8.5, 6.8, 3.0, 2-H), 3.64 (1H, ddt,  $J$  8.5, 4.2, 3.1, 3-H), 2.11–1.99 (4H, m, 4-H<sub>2</sub> and 7-H<sub>2</sub>), 1.98 (3H, s, COCH<sub>3</sub>), 1.38–1.25 (4H, m, 8-H<sub>2</sub> and 9-H<sub>2</sub>), 1.10 (3H, d,  $J$  6.8, 1-H<sub>3</sub>), 0.88 (3H, t,  $J$  7.1, 10-H<sub>3</sub>);  $m/z$  (ES<sup>+</sup>) 236.3 [M+Na]<sup>+</sup>; HRMS (ES<sup>+</sup>) found [M+Na]<sup>+</sup> 236.1620, C<sub>12</sub>H<sub>23</sub>O<sub>2</sub>N<sub>1</sub><sup>23</sup>Na<sub>1</sub> requires  $M^+$  236.1621.

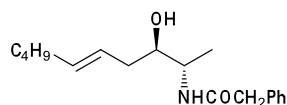

**21by N-((2S,3R,E)-3-hydroxydec-5-en-2-yl)-2-phenylacetamide**

Yield (85%);  $\delta_{\text{H}}$  (400 MHz,  $\text{CDCl}_3$ ) 7.40–7.22 (5H, m, ArH), 5.73 (1H, br s, NH), 5.50 (1H, dt,  $J$  15.2, 6.6, 6-H), 5.35 (1H, ddd,  $J$  15.2, 7.7, 6.3, 5-H), 3.99 (1H, ddd,  $J$  8.5, 6.9, 3.1, 2-H), 3.56 (1H, m, 3-H and PhCH<sub>2</sub>), 2.22–2.08 (2H, m, 4-H<sub>2</sub>), 2.06–1.92 (2H, m, 7-H<sub>2</sub>), 1.34–1.28 (4H, m, 8-H<sub>2</sub> and 9-H<sub>2</sub>), 1.04 (3H, d,  $J$  6.9, 1-H<sub>3</sub>), 0.88 (3H, t,  $J$  7.1, 10-H<sub>3</sub>);  $m/z$  (ES<sup>+</sup>) 312.4 [M+Na]<sup>+</sup>; HRMS (ES<sup>+</sup>) found [M+Na]<sup>+</sup> 312.1935, C<sub>18</sub>H<sub>27</sub>O<sub>2</sub>N<sub>1</sub><sup>23</sup>Na<sub>1</sub> requires  $M^+$  312.1934.

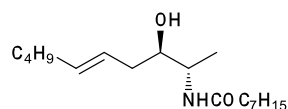

**21bx N-((2S,3R,E)-3-hydroxydec-5-en-2-yl)octanamide**

Yield (83%);  $\delta_{\text{H}}$  (400 MHz,  $\text{CDCl}_3$ ) 6.03–5.98 (1H, br s, NH), 5.54–5.43 (1H, m, 6-H), 5.35–5.25 (1H, m, 5-H), 4.23–4.11 (1H, m, 2-H), 4.05–3.98 (1H, m, 3-H), 2.35–2.27 (2H, m,  $\text{COCH}_2$ ), 2.20–2.11 (2H, m, 4- $H_2$ ), 2.06–1.94 (2H, m, 7- $H_2$ ), 1.68–1.50 (2H, m,  $\text{COCH}_2\text{CH}_2$ ), 1.39–1.19 (12H, m, 8- $H_2$ , 9- $H_2$  and 4  $\times$  aliphatic  $\text{CH}_2$ ), 1.14–1.05 (3H, d,  $J$  6.9, 1- $H_3$ ), 0.86 (6H, 10- $H_3$  and octanoyl terminal  $\text{CH}_3$ );  $m/z$  ( $\text{ES}^+$ ) 298.5 [ $\text{M}+\text{H}$ ] $^+$ , 320.5 [ $\text{M}+\text{Na}$ ] $^+$ ; HRMS ( $\text{ES}^+$ ) found [ $\text{M}+\text{Na}$ ] $^+$  320.2563,  $\text{C}_{18}\text{H}_{35}\text{O}_2\text{N}_1^{23}\text{Na}_1$  requires  $M^+$  320.2560.

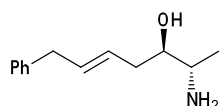

**21cn (2S,3R,E)-2-amino-7-phenylhept-5-en-3-ol**

Yield (46%);  $\delta_{\text{H}}$  (700 MHz,  $\text{CDCl}_3$ ) 7.88 (2H, br s,  $\text{NH}_2$ ), 7.20–7.11 (5H, m, ArH), 5.71–5.65 (1H, m, 6-H), 5.45–5.40 (1H, m, 5-H), 3.93–3.89 (1H, m, 3-H), 3.36 (1H, d,  $J$  7.7, 2-H), 3.32 (2H, d,  $J$  6.7, 7- $H_2$ ), 2.28–2.09 (2H, m, 4- $H_2$ ), 1.20 (3H, d,  $J$  6.3, 1- $H_3$ ).  $m/z$  ( $\text{ES}^+$ ) 206.3 [ $\text{M}+\text{H}$ ] $^+$ , 228.3 [ $\text{M}+\text{Na}$ ] $^+$ ; HRMS ( $\text{ES}^+$ ) found [ $\text{M}+\text{H}$ ] $^+$  206.1540,  $\text{C}_{13}\text{H}_{20}\text{O}_1\text{N}_1$  requires  $M^+$  206.1539.

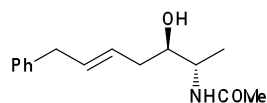

**21cz N-((2S,3R,E)-3-hydroxy-7-phenylhept-5-en-2-yl)acetamide**

Yield (86%);  $\delta_{\text{H}}$  (400 MHz,  $\text{CDCl}_3$ ) 7.34–7.24 (2H, m, ArH), 7.24–7.15 (3H, m, ArH), 5.79 (1H, br s, NH), 5.73 (1H, ddd,  $J$  15.2, 8.4, 4.3, 6-H), 5.52 (1H, ddd,  $J$  15.2, 7.7, 6.4, 5-H), 4.03 (1H, dqd,  $J$  13.8, 6.9, 3.0, 2-H), 3.72–3.65 (1H, m, 3-H), 3.37 (1H, d,  $J$  6.7, 7- $H_2$ ), 2.30–2.04 (2H, m, 4- $H_2$ ), 1.98 (3H, s,  $\text{COCH}_3$ ), 1.11 (3H, d,  $J$  6.9, 1- $H_3$ );  $m/z$  ( $\text{ES}^+$ ) 248.4 [ $\text{M}+\text{H}$ ] $^+$ , 270.3 [ $\text{M}+\text{Na}$ ] $^+$ ; HRMS ( $\text{ES}^+$ ) found [ $\text{M}+\text{Na}$ ] $^+$  270.1464,  $\text{C}_{15}\text{H}_{21}\text{O}_2\text{N}_1^{23}\text{Na}_1$  requires  $M^+$  270.1465.

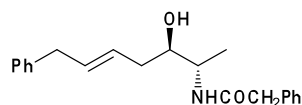

**21cy N-((2S,3R,E)-3-hydroxy-7-phenylhept-5-en-2-yl)-2-phenylacetamide**

Yield (27%);  $\delta_{\text{H}}$  (400 MHz,  $\text{CDCl}_3$ ) 7.43–7.08 (10H, m, ArH), 5.78–5.59 (1H, m, 6-H), 5.57–5.37 (1H, m, 5-H), 4.07–3.93 (1H, m, 2-H), 3.64–3.50 (3H, m, 2-H and  $\text{PhCH}_2$ ), 3.34 (1H, d,  $J$  6.7, 7- $H_2$ ), 2.25–1.93 (2H, m, 4- $H_2$ ), 1.03 (3H, d,  $J$  6.8, 1- $H_3$ );  $m/z$  ( $\text{ES}^+$ ) 346.4 [ $\text{M}+\text{Na}$ ] $^+$ ; HRMS ( $\text{ES}^+$ ) found [ $\text{M}+\text{Na}$ ] $^+$  346.1779,  $\text{C}_{21}\text{H}_{25}\text{O}_2\text{N}_1^{23}\text{Na}_1$  requires  $M^+$  346.1778.

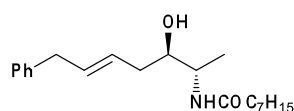

**21cx N-((2S,3R,E)-3-hydroxy-7-phenylhept-5-en-2-yl)octanamide**

Yield (70%);  $\delta_{\text{H}}$  (400 MHz,  $\text{CDCl}_3$ ) 7.31–7.27 (2H, m, ArH), 7.23–7.15 (3H, m, ArH), 5.87–5.65 (1H, m, NH and 6-H), 5.52 (1H, dt,  $J$  14.2, 6.6, 5-H), 4.13–3.94 (1H, m, 2-H), 3.78–3.59 (1H, m, 3-H), 3.37 (1H, d,  $J$  6.6, 7- $H_2$ ), 2.32–2.04 (2H, m,  $\text{COCH}_2$ ), 1.70–1.54 (2H, m,  $\text{COCH}_2\text{CH}_2$ ), 1.37–1.21 (8H, m, 4  $\times$  aliphatic  $\text{CH}_2$ ), 1.13 (3H, d,  $J$  6.9, 1- $H_3$ ), 0.87 (3H, t,  $J$  6.6, octanoyl terminal  $\text{CH}_3$ );  $m/z$  ( $\text{ES}^+$ ) 332.5 [ $\text{M}+\text{H}$ ] $^+$ , 354.4 [ $\text{M}+\text{Na}$ ] $^+$ ; HRMS ( $\text{ES}^+$ ) found [ $\text{M}+\text{Na}$ ] $^+$  354.2403,  $\text{C}_{21}\text{H}_{33}\text{O}_2\text{N}_1$  $^{23}\text{Na}_1$  requires  $M^+$  354.2404.

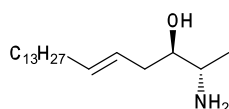

**21an (2S,3R,E)-2-aminononadec-5-en-3-ol**

Yield (70%);  $\delta_{\text{H}}$  (700 MHz,  $\text{CDCl}_3$ ) 8.12 (2H, br s,  $\text{NH}_2$ ), 5.56–5.48 (1H, m, 6-H), 5.38 (1H, dd,  $J$  14.0, 6.7, 5-H), 3.73–3.67 (1H, m, 3-H), 3.65–3.60 (1H, m, 2-H), 2.15–2.07 (1H, m, 4-HH), 2.04–1.95 (3H, m, 4-HH and 7- $H_2$ ), 1.38–1.09 (26H, m, 8- $H_2$  to 18- $H_2$  and 1- $H_3$ ), 0.86 (3H, t,  $J$  7.0, 19- $H_3$ ).  $m/z$  ( $\text{ES}^+$ ) 298.4 [ $\text{M}+\text{H}$ ] $^+$ ; HRMS ( $\text{ES}^+$ ) found [ $\text{M}+\text{H}$ ] $^+$  298.3099,  $\text{C}_{19}\text{H}_{40}\text{O}_1\text{N}_1$  requires  $M^+$  298.3110.

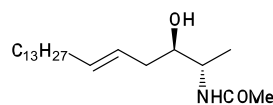

**21az N-((2S,3R,E)-3-hydroxynonadec-5-en-2-yl)acetamide**

Yield (82%);  $\delta_{\text{H}}$  (400 MHz,  $\text{CDCl}_3$ ) 5.96 (1H, br d,  $J$  6.0, NH), 5.54 (1H, dt,  $J$  15.0, 6.6, 6-H), 5.45–5.34 (1H, m, 5-H), 4.00 (1H, ddd,  $J$  8.5, 6.9, 3.0, 3-H), 3.64 (1H, ddd,  $J$  8.8, 4.4, 3.0, 2-H), 2.23–1.99 (4H, m, 7- $H_2$  and 4- $H_2$ ), 1.97 (3H, s,  $\text{COCH}_3$ ), 1.38–1.21 (22H, m, 8- $H_2$  to 18- $H_2$ ), 1.10 (3H, d,  $J$  6.8, 1- $H_3$ ), 0.87 (3H, t,  $J$  6.9, 19- $H_3$ ).  $m/z$  ( $\text{ES}^-$ ) 338.4 [ $\text{M}-\text{H}$ ] $^-$ ; ( $\text{ES}^+$ ) 362.4.3 [ $\text{M}+\text{Na}$ ] $^+$ ; HRMS ( $\text{ES}^+$ ) found [ $\text{M}+\text{H}$ ] $^+$  340.3219,  $\text{C}_{21}\text{H}_{42}\text{O}_2\text{N}_1$  requires  $M^+$  340.3216.

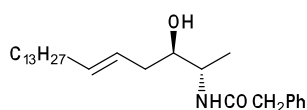

**21ay N-((2S,3R,E)-3-hydroxynonadec-5-en-2-yl)-2-phenylacetamide**

Yield (86%);  $\delta_{\text{H}}$  (400 MHz,  $\text{CDCl}_3$ ) 7.37–7.32 (2H, m, ArH), 7.31–7.24 (3H, m, ArH), 5.74 (1H, br d,  $J$  8.3, NH), 5.50 (1H, dt,  $J$  14.7, 6.6, 6-H), 5.34 (1H, ddd,  $J$  15.2, 7.6, 6.4, 5-H), 3.99 (1H, ddd,  $J$  8.4, 6.9, 3.1, 3-H), 3.73–3.64 (1H, m, 2-H), 3.55 (2H, s,  $\text{PhCH}_2$ ), 2.15–2.08 (2H, m, 4- $H_2$ ), 2.06–1.94 (2H, m, 7- $H_2$ ), 1.36–1.22 (22H, m, 8- $H_2$  to 18- $H_2$ ), 1.04 (3H, d,  $J$  6.8, 1- $H_2$ ), 0.88 (3H, t,  $J$  6.9, 19- $H_3$ ).  $m/z$  ( $\text{ES}^-$ ) 414.4 [ $\text{M}-\text{H}$ ] $^-$ ; ( $\text{ES}^+$ ) 438.4 [ $\text{M}+\text{Na}$ ] $^+$ ; HRMS ( $\text{ES}^+$ ) found [ $\text{M}+\text{H}$ ] $^+$  416.3533,  $\text{C}_{27}\text{H}_{46}\text{O}_2\text{N}_1$  requires  $M^+$  416.3529.



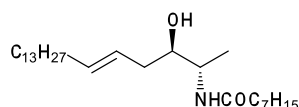

**21ax N-((2S,3R,E)-3-hydroxynonadec-5-en-2-yl)octanamide**

Yield (85%);  $\delta_{\text{H}}$  (400 MHz,  $\text{CDCl}_3$ ) 5.85 (1H, br d,  $J$  8.4, NH), 5.55 (1H, dt,  $J$  14.9, 6.6, 6-H), 5.39 (1H, ddd,  $J$  15.0, 7.5, 6.4, 5-H), 4.03 (1H, ddd,  $J$  8.7, 7.0, 3.0, 3-H), 3.64 (1H, ddd,  $J$  8.8, 4.1, 3.0, 2-H), 2.33 (2H, t,  $J$  7.5,  $\text{COCH}_2$ ), 2.19–2.14 (2H, m, 4- $H_2$ ), 2.00 (2H, dd,  $J$  13.7, 6.6, 7- $H_2$ ), 1.62 (2H, dd,  $J$  13.3, 6.0,  $\text{COCH}_2\text{CH}_2$ ), 1.34–1.22 (26H, m, 8- $H_2$  to 18- $H_2$  and 4  $\times$  aliphatic  $\text{CH}_2$ ), 1.10 (3H, d,  $J$  6.8, 1- $H_3$ ), 0.87 (3H, t,  $J$  6.7, 19- $H_3$ ).  $m/z$  ( $\text{ES}^-$ ) 422.  $[\text{M}-\text{H}]^-$ ; ( $\text{ES}^+$ ) 446.4  $[\text{M}+\text{Na}]^+$ ; HRMS ( $\text{ES}^+$ ) found  $[\text{M}+\text{H}]^+$  424.4174,  $\text{C}_{27}\text{H}_{54}\text{O}_2\text{N}_1$  requires  $M^+$  424.4155.

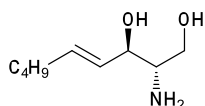

**17bn (2S,3R,E)-2-aminonon-4-ene-1,3-diol**

Yield (54%);  $\delta_{\text{H}}$  (400 MHz,  $\text{CDCl}_3$ ) 5.80–5.71 (1H, m, 5-H), 5.42 (1H, dd,  $J$  15.2, 6.7, 4-H), 4.31 (4H, br s,  $\text{NH}_2$  and 2  $\times$  OH), 4.25–4.19 (1H, m, 3-H), 3.78–3.63 (2H, m, 2-H and 1-HH), 3.06 (1H, dd,  $J$  8.7, 4.2, 1-HH), 2.04 (2H, dd,  $J$  13.1, 6.5, 6- $H_2$ ), 1.39–1.26 (4H, m, 7- $H_2$  and 8- $H_2$ ), 0.88 (3H, t,  $J$  7.0, 9- $H_3$ );  $m/z$  ( $\text{ES}^+$ ) 174.3  $[\text{M}+\text{H}]^+$ , 196.4  $[\text{M}+\text{Na}]^+$ ; HRMS ( $\text{ES}^+$ ) found  $[\text{M}+\text{H}]^+$  174.1490,  $\text{C}_9\text{H}_{20}\text{O}_2\text{N}_1$  requires  $M^+$  174.1489.

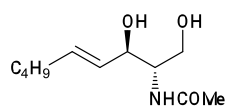

**17bz N-((2S,3R,E)-1,3-dihydroxynon-4-en-2-yl)acetamide**

Yield (73%);  $\delta_{\text{H}}$  (700 MHz,  $\text{CDCl}_3$ ) 6.44 (1H, br d,  $J$  13.7, NH), 5.82–5.76 (1H, m, 5-H), 5.41 (1H, dd,  $J$  15.1, 5.7, 4-H), 4.47–4.39 (1H, m, 3-H), 3.87–3.77 (2H, m, 2-H and 1-HH), 3.35–3.29 (1H, m, 1-HH), 2.09–2.00 (5H, m, 6- $H_2$  and  $\text{COCH}_3$ ), 1.41–1.23 (4H, m, 7- $H_2$  and 8- $H_2$ ), 0.88 (3H, t,  $J$  7.3, 9- $H_3$ ).  $m/z$  ( $\text{ES}^+$ ) 238.2  $[\text{M}+\text{Na}]^+$   $\text{C}_{11}\text{H}_{21}\text{O}_3\text{N}_1^{23}\text{Na}_1$ ; HRMS ( $\text{ES}^+$ ) found  $[\text{M}+\text{Na}]^+$  238.1419,  $\text{C}_{11}\text{H}_{21}\text{O}_3\text{N}_1^{23}\text{Na}_1$  requires  $M^+$  238.1419.

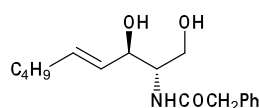

**17by N-((2S,3R,E)-1,3-dihydroxynon-4-en-2-yl)-2-phenylacetamide**

Yield (65%);  $\delta_{\text{H}}$  (400 MHz,  $\text{CDCl}_3$ ) 7.35–7.23 (5H, m, ArH), 6.34 (1H, br d,  $J$  6.6, NH), 5.66 (1H, dt,  $J$  14.9, 6.7, 5-H), 5.40 (1H, dd,  $J$  14.9, 6.5, 4-H), 4.23–4.16 (1H, m, 3-H), 3.88–3.79 (2H, m, 2-H and 1-HH), 3.61 (1H, dd,  $J$  10.9, 2.7, 1-HH), 3.56 (2H, s,  $\text{PhCH}_2$ ), 1.98 (1H, dd,  $J$  13.5, 6.8, 6- $H_2$ ), 1.32–1.25 (4H, m, 7- $H_2$  and 8- $H_2$ ), 0.88 (3H, t,  $J$  7.0, 9- $H_3$ );  $m/z$  ( $\text{ES}^+$ ) 292.2  $[\text{M}+\text{H}]^+$ , 314.2  $[\text{M}+\text{Na}]^+$ ; HRMS ( $\text{ES}^+$ ) found  $[\text{M}+\text{H}]^+$  292.1907,  $\text{C}_{17}\text{H}_{26}\text{O}_3\text{N}_1$  requires  $M^+$  292.1913.

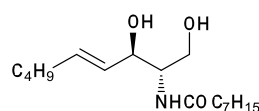

**17bx N-((2S,3R,E)-1,3-dihydroxynon-4-en-2-yl)octanamide**

Yield (68%);  $\delta_{\text{H}}$  (400 MHz,  $\text{CDCl}_3$ ) 6.44 (1H, br s, NH), 5.74 (1H, dt,  $J$  15.9, 6.7, 5- $H$ ), 5.49 (1H, dd,  $J$  15.9, 6.0, 4- $H$ ), 4.30–4.21 (1H, m, 3- $H$ ), 3.94–3.84 (2H, m, 2- $H$  and 1- $HH$ ), 3.71–3.63 (1H, m, 1- $HH$ ), 2.24–2.16 (2H, m,  $\text{COCH}_2$ ), 2.04 (2H, dd,  $J$  13.0, 6.7, 6- $H_2$ ), 1.64–1.55 (2H, m,  $\text{COCH}_2\text{CH}_2$ ), 1.34–1.21 (4H, m, 7- $H_2$  and 8- $H_2$ ), 0.87, 0.86 (2  $\times$  3H, t,  $J$  6.5, 9- $H_3$  and octanoyl terminal  $\text{CH}_3$ );  $m/z$  ( $\text{ES}^+$ ) 300.3  $[\text{M}+\text{H}]^+$ ; HRMS ( $\text{ES}^+$ ) found  $[\text{M}+\text{H}]^+$  300.2536,  $\text{C}_{17}\text{H}_{34}\text{O}_3\text{N}_1$  requires  $M^+$  300.2539.

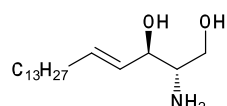

**17an (2S,3R,E)-2-aminooctadec-4-ene-1,3-diol<sup>2</sup>**

Yield (64%);  $\delta_{\text{H}}$  (400 MHz,  $\text{CDCl}_3$ ) 5.87–5.79 (1H, m, 5- $H$ ), 5.53 (1H, dd,  $J$  15.4, 6.5, 4- $H$ ), 4.78 (2H, br s,  $\text{NH}_2$ ), 4.41–4.36 (1H, m, 3- $H$ ), 4.10 (1H, dd,  $J$  11.5, 2.7, 1- $HH$ ), 3.93 (1H, m, 2- $H$ ), 3.73 (1H, dd,  $J$  11.5, 3.5, 1- $HH$ ), 2.77 (2H, br s, 2  $\times$  OH), 2.06 (2H, dd,  $J$  14.0, 7.0, 6- $H_2$ ), 1.67 (1 H, dq,  $J$  12.2, 6.0, 17- $H_2$ ), 1.48–1.22 (20H, m, 7- $H_2$  to 16- $H_2$ ), 0.89 (1H, t,  $J$  7.5, 18- $H_3$ );  $m/z$  ( $\text{ES}^+$ ) 300.5  $[\text{M}+\text{H}]^+$ , 322.5  $[\text{M}+\text{Na}]^+$ ; HRMS ( $\text{ES}^+$ ) found  $[\text{M}+\text{H}]^+$  300.2902,  $\text{C}_{18}\text{H}_{38}\text{O}_2\text{N}_1$  requires  $M^+$  300.2897.

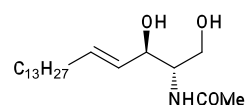

**17az N-((2S,3R,E)-1,3-dihydroxyoctadec-4-en-2-yl)acetamide**

Yield (71%);  $\delta_{\text{H}}$  (400 MHz,  $\text{CDCl}_3$ ) 5.81 (1H, dt,  $J$  14.6, 7.1, 5- $H$ ), 5.51 (1H, dd,  $J$  15.4, 6.4, 4- $H$ ), 5.39 (1H, br s, NH), 4.38–4.32 (1H, m, 3- $H$ ), 4.07 (1 H, dd,  $J$  11.6, 2.7, 2- $H$ ), 3.83–3.78 (1H, m, 1- $HH$ ), 3.73 (1H, dd,  $J$  11.6, 2.9, 1- $HH$ ), 2.09–1.98 (5H, m, 6- $H_2$  and  $\text{COCH}_3$ ), 1.39–1.20 (22H, m, 7- $H_2$  to 17- $H_2$ ), 0.87 (1H, t,  $J$  6.7, 18- $H_3$ );  $m/z$  ( $\text{ES}^+$ ) 364.4  $[\text{M}+\text{Na}]^+$ ; HRMS ( $\text{ES}^+$ ) found  $[\text{M}+\text{Na}]^+$  364.2829,  $\text{C}_{20}\text{H}_{39}\text{O}_3\text{N}_1^{23}\text{N}_1$  requires  $M^+$  364.2822.

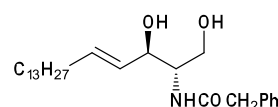

**17ay N-((2S,3R,E)-1,3-dihydroxyoctadec-4-en-2-yl)-2-phenylacetamide**

Yield (44%);  $\delta_{\text{H}}$  (400 MHz,  $\text{CDCl}_3$ ) 7.38–7.25 (5H, m, ArH), 6.21 (1H, br d,  $J$  7.0, NH), 5.73–5.63 (1H, m, 5- $H$ ), 5.42 (1H, dd,  $J$  15.4, 6.5, 4- $H$ ), 4.27–4.20 (1H, m, 3- $H$ ), 3.90–3.83 (2H, m, 2- $H$  and 1- $HH$ ), 3.65 (1H, dd,  $J$  11.8, 3.9, 1- $HH$ ), 3.60 (2H, s,  $\text{PhCH}_2$ ), 2.97–2.64 (2H, m, 2  $\times$  OH), 1.99 (2H, dd,  $J$  13.8, 6.9, 6- $H_2$ ), 1.34–1.16 (22H, m, 7- $H_2$  to 17- $H_2$ ), 0.88 (1H, t,  $J$  6.8, 18- $H_3$ );  $m/z$  ( $\text{ES}^+$ ) 440.5  $[\text{M}+\text{Na}]^+$ ; HRMS ( $\text{ES}^+$ ) found  $[\text{M}+\text{H}]^+$  418.3324,  $\text{C}_{26}\text{H}_{44}\text{O}_3\text{N}_1$  requires  $M^+$  418.3316.

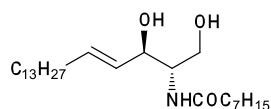

**17ax N-((2S,3R,E)-1,3-dihydroxyoctadec-4-en-2-yl)octanamide**

Yield (38%);  $\delta_{\text{H}}$  (400 MHz,  $\text{CDCl}_3$ ) 6.25 (1H, br d,  $J$  7.8,  $\text{NH}$ ), 5.84–5.74 (1H, m, 5- $H$ ), 5.53 (1H, dd,  $J$  15.5, 6.5, 4- $H$ ), 4.36–4.30 (1H, m, 3- $H$ ), 3.96 (1H, dd,  $J$  11.1, 3.7, 1- $\text{HH}$ ), 3.93–3.88 (1 H, m, 2- $H$ ), 3.70 (1H, dd,  $J$  11.1, 2.9, 1- $\text{HH}$ ), 2.71 (2H, br s,  $2 \times \text{OH}$ ), 2.27–2.20 (2H, m,  $\text{COCH}_2$ ), 2.06 (2H, dd,  $J$  14.6, 7.4, 6- $H_2$ ), 1.71–1.57 (2H, m,  $\text{COCH}_2\text{CH}_2$ ), 1.43–1.18 (28H, m, 7- $H_2$  to 17- $H_2$  and 4'- $H_2$  to 7'- $H_2$ ), 0.92–0.83 (6H, m, 18- $H_3$  and octanoyl terminal  $\text{CH}_3$ );  $m/z$  ( $\text{ES}^+$ ) 426.4  $[\text{M}+\text{H}]^+$ ; HRMS ( $\text{ES}^+$ ) found  $[\text{M}+\text{Na}]^+$  448.3761,  $\text{C}_{26}\text{H}_{44}\text{O}_3\text{N}_1$  requires  $M^+$  448.3767.

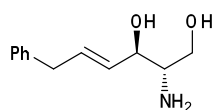

**17cn (2S,3R,E)-2-amino-6-phenylhex-4-ene-1,3-diol**

Yield (67%);  $\delta_{\text{H}}$  (400 MHz,  $\text{CDCl}_3$ ) 7.25–7.20 (2H, m,  $\text{ArH}$ ), 7.16–7.07 (3H, m,  $\text{ArH}$ ), 5.88 (1H, dt,  $J$  15.0, 6.6, 5- $H$ ), 5.42 (1H, dd,  $J$  15.0, 5.0, 4- $H$ ), 4.87 (2H, br s,  $\text{NH}_2$ ), 4.40–4.29 (1H, m, 3- $H$ ), 3.76–3.67 (2H, m, 3- $H$  and 1- $\text{HH}$ ), 3.41–3.33 (1H, m, 1- $\text{HH}$ ), 3.30 (2H, d,  $J$  6.6, 6- $H_2$ ), 3.21–3.14 (2H, br s,  $2 \times \text{OH}$ );  $m/z$  ( $\text{ES}^+$ ) 208.2  $[\text{M}+\text{H}]^+$ ; HRMS ( $\text{ES}^+$ ) found  $[\text{M}+\text{H}]^+$  208.1331,  $\text{C}_{12}\text{H}_{18}\text{O}_2\text{N}_1$  requires  $M^+$  208.1338.

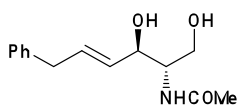

**17cz N-((2S,3R,E)-1,3-dihydroxy-6-phenylhex-4-en-2-yl)acetamide**

Yield (31%);  $\delta_{\text{H}}$  (400 MHz,  $\text{CDCl}_3$ ) 7.32–7.27 (2H, m,  $\text{ArH}$ ), 7.23–7.14 (3H, m,  $\text{ArH}$ ), 6.32 (1H, br d,  $\text{NH}$ ), 5.96 (1H, dt,  $J$  15.4, 6.7, 5- $H$ ), 5.61 (1H, dd,  $J$  15.4, 6.0, 4- $H$ ), 4.38–4.32 (1H, m, 3- $H$ ), 3.99–3.88 (2H, m, 2- $H$  and 1- $\text{HH}$ ), 3.70 (1H, dd,  $J$  11.0, 2.8, 1- $\text{HH}$ ), 3.40 (1H, d,  $J$  6.7, 6- $H_2$ ), 2.01 (3H, s,  $\text{COCH}_3$ );  $m/z$  ( $\text{ES}^+$ ) 250.1  $[\text{M}+\text{H}]^+$ , 272.1  $[\text{M}+\text{Na}]^+$ ; HRMS ( $\text{ES}^+$ ) found  $[\text{M}+\text{Na}]^+$  272.1248,  $\text{C}_{14}\text{H}_{19}\text{O}_3\text{N}_1^{23}\text{Na}_1$  requires  $M^+$  272.1263.

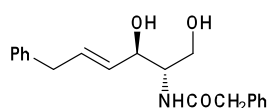

**17cy N-((2S,3R,E)-1,3-dihydroxy-6-phenylhex-4-en-2-yl)-2-phenylacetamide**

Yield (85%);  $\delta_{\text{H}}$  (400 MHz,  $\text{CDCl}_3$ ) 7.34–7.25 (6H, m,  $\text{ArH}$ ), 7.22–7.11 (4H, m,  $\text{ArH}$ ), 6.32 (1H, br d,  $J$  7.5,  $\text{NH}$ ), 5.82 (1H, dt,  $J$  15.0, 6.8, 5- $H$ ), 5.47 (1H, dd,  $J$  15.0, 5.8, 4- $H$ ), 4.24–4.18 (1H, m, 3- $H$ ), 3.89–3.84 (1H, m, 2- $H$ ), 3.81 (1H, dd,  $J$  11.1, 4.0, 1- $\text{HH}$ ), 3.59 (1H, dd,  $J$  11.1, 3.2, 1- $\text{HH}$ ), 3.51 (2H, s,  $\text{COCH}_2$ ), 3.31 (2H, d,  $J$  6.8, 6- $H_2$ ), 2.25 (2H, br s,  $2 \times \text{OH}$ );  $m/z$  ( $\text{ES}^+$ ) 326.2  $[\text{M}+\text{H}]^+$ ; HRMS ( $\text{ES}^+$ ) found  $[\text{M}+\text{H}]^+$  326.1767,  $\text{C}_{20}\text{H}_{24}\text{O}_3\text{N}_1$  requires  $M^+$  326.1756.

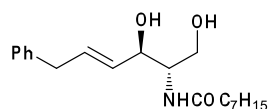

**17cx N-((2S,3R,E)-1,3-dihydroxy-6-phenylhex-4-en-2-yl)octanamide**

Yield (82%);  $\delta_{\text{H}}$  (400 MHz,  $\text{CDCl}_3$ ) 7.31–7.23 (3H, m, ArH), 7.22–7.18 (1H, m, ArH), 7.17–7.11 (2H, m, ArH), 6.41 (1H, br d,  $J$  6.6, NH), 5.92 (1H, dt,  $J$  15.3, 6.8, 5-H), 5.58 (1H, dd,  $J$  15.3, 6.1, 4-H), 4.33–4.27 (1H, m, 3-H), 3.89 (2H, m, 2-H and 1-HH), 3.66 (1H, dd,  $J$  12.6, 4.7, 1-HH), 3.38 (2H, d,  $J$  6.8, 6-H<sub>2</sub>), 2.23–2.10 (2H, m,  $\text{COCH}_2$ ), 1.63–1.53 (2H, m,  $\text{COCH}_2\text{CH}_2$ ), 1.32–1.22 (8H, m, 4 × aliphatic  $\text{CH}_2$ ), 0.87 (3H, t,  $J$  6.8, octanoyl terminal  $\text{CH}_3$ );  $m/z$  ( $\text{ES}^+$ ) 334.2 [ $\text{M}+\text{H}$ ]<sup>+</sup>; HRMS ( $\text{ES}^+$ ) found [ $\text{M}+\text{Na}$ ]<sup>+</sup> 334.2393,  $\text{C}_{20}\text{H}_{32}\text{O}_3\text{N}_1$  requires  $M^+$  334.2382.

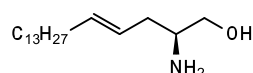

**27an (S,E)-2-aminooctadec-4-en-1-ol**

Yield (61%);  $\delta_{\text{H}}$  (400 MHz,  $\text{CDCl}_3$ ) 5.51 (1H, dt,  $J$  13.9, 6.5, 5-H), 5.38–5.30 (1H, m, 4-H), 3.60 (1H, d,  $J$  8.2, 1-HH), 3.33 (1H, dd,  $J$  10.2, 8.2, 1-HH), 2.97–2.83 (1H, m, 2-H), 2.34 (3H, br s,  $\text{NH}_2$  and OH), 2.20–2.10 (1H, m, 3-H<sub>2</sub>), 1.99 (2H, dd,  $J$  13.5, 6.6, 6-H<sub>2</sub>), 1.37–1.20 (22H, m, 7-H<sub>2</sub> to 17-H<sub>2</sub>), 0.87 (3H, t,  $J$  6.5, 18-H<sub>3</sub>);  $m/z$  ( $\text{ES}^+$ ) 284.2 [ $\text{M}+\text{H}$ ]<sup>+</sup>; HRMS ( $\text{ES}^+$ ) found [ $\text{M}+\text{H}$ ]<sup>+</sup> 284.2947,  $\text{C}_{18}\text{H}_{38}\text{O}_1\text{N}_1$  requires  $M^+$  284.2953.

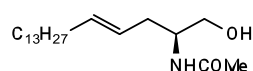

**27az (S,E)-N-(1-hydroxyoctadec-4-en-2-yl)acetamide**

Yield (68%);  $\delta_{\text{H}}$  (700 MHz,  $\text{CDCl}_3$ ) 5.82 (1H, br d,  $J$  14.8, NH), 5.51 (1H, dt,  $J$  15.0, 6.7, 5-H), 5.34 (1H, dt,  $J$  15.1, 7.1, 4-H), 3.91 (1H, tdd,  $J$  11.1, 7.2, 3.6, 2-H), 3.65 (1H, dd,  $J$  11.0, 3.3, 1-HH), 3.58 (1H, dd,  $J$  11.1, 5.7, 1-HH), 3.25 (1H, br s, OH), 2.27–2.22 (1H, m, 3-HH), 2.17 (1H, dt,  $J$  14.1, 7.1, 3-HH), 1.98 (5H, m, 6-H<sub>2</sub> and  $\text{COCH}_3$ ), 1.35–1.30 (2H, m, 7-H<sub>2</sub>), 1.30 – 1.22 (20H, m, 8-H<sub>2</sub> to 17-H<sub>2</sub>), 0.87 (3H, t,  $J$  7.1, 18-H<sub>3</sub>);  $m/z$  ( $\text{ES}^-$ ) 324.4 [ $\text{M}-\text{H}$ ]<sup>-</sup>; ( $\text{ES}^+$ ) 326.4 [ $\text{M}+\text{H}$ ]<sup>+</sup>; HRMS ( $\text{ES}^+$ ) found [ $\text{M}+\text{H}$ ]<sup>+</sup> 326.3046,  $\text{C}_{20}\text{H}_{40}\text{O}_2\text{N}_1$  requires  $M^+$  326.3035.

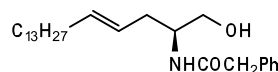

**27ay (S,E)-N-(1-hydroxyoctadec-4-en-2-yl)-2-phenylacetamide**

Yield (82%);  $\delta_{\text{H}}$  (700 MHz,  $\text{CDCl}_3$ ) 7.36–7.33 (1 H, m, ArH), 7.30–7.28 (1 H, m, ArH), 7.25–7.22 (1 H, m, ArH), 5.58 (1H, br d,  $J$  5.6, NH), 5.32 (1H, dt,  $J$  14.7, 6.6, 5-H), 5.23–5.18 (1 H, m, 4-H), 3.88 (1H, dtd,  $J$  13.2, 6.5, 3.8, 2-H), 3.61 (1H, dd,  $J$  11.1, 3.5, 1-HH), 3.58 (2H, s,  $\text{PhCH}_2$ ), 3.54 (1H, dd,  $J$  11.1, 6.2, 1-HH), 2.19–2.14 (1H, m, 3-HH), 2.09–2.04 (1H, m, 3-HH), 1.88 (2H, dd,  $J$  13.2, 6.5, 6-H<sub>2</sub>), 1.31–1.23 (22H, m, 7-H<sub>2</sub> to 17-H<sub>2</sub>), 0.88 (3H, t,  $J$  7.0, 18-H<sub>3</sub>);  $m/z$  ( $\text{ES}^-$ ) 400.5 [ $\text{M}-\text{H}$ ]<sup>-</sup>; ( $\text{ES}^+$ ) 402.4 [ $\text{M}+\text{H}$ ]<sup>+</sup>; HRMS ( $\text{ES}^+$ ) found [ $\text{M}+\text{H}$ ]<sup>+</sup> 402.3356,  $\text{C}_{26}\text{H}_{44}\text{O}_2\text{N}_1$  requires  $M^+$  402.3348.

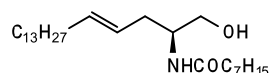

**27ax (S,E)-N-(1-hydroxyoctadec-4-en-2-yl)octanamide**

Yield (85%);  $\delta_{\text{H}}$  (700 MHz,  $\text{CDCl}_3$ ) 5.71 (1 H, br s, NH), 5.52 (1H, dt,  $J$  14.8, 6.8, 5-*H*), 5.37–5.31 (1H, m, 4-*H*), 3.91 (1H, tdd,  $J$  10.8, 6.9, 3.6, 2-*H*), 3.65 (1H, dd,  $J$  10.9, 3.1, 1-*HH*), 3.58 (1H, dd,  $J$  11.0, 6.0, 1-*HH*), 3.28 (1H, br s, OH), 2.26 (1H, dt,  $J$  13.5, 6.6, 3-*HH*), 2.20–2.14 (3H, m, 3-*HH* and  $\text{COCH}_2$ ), 1.99 (2H, dd,  $J$  14.3, 7.1, 6-*H}\_2), 1.60 (2H, dt,  $J$  14.6, 7.4,  $\text{COCH}_2\text{CH}_2$ ), 1.35–1.22 (30H, m, 7-*H}\_2* to 17-*H}\_2* and 4  $\times$  aliphatic  $\text{CH}_2$ ), 0.87 (6H, t,  $J$  7.1, 18-*H}\_3* and terminal octanoyl  $\text{CH}_3$ );  $m/z$  ( $\text{ES}^-$ ) 408.5 [ $\text{M}-\text{H}$ ] $^-$ ; ( $\text{ES}^+$ ) 410.5 [ $\text{M}+\text{Na}$ ] $^+$ ; HRMS ( $\text{ES}^+$ ) found [ $\text{M}+\text{H}$ ] $^+$  410.3999,  $\text{C}_{26}\text{H}_{52}\text{O}_2\text{N}_1$  requires  $M^+$  410.3998.*

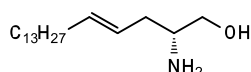

**26an (R,E)-2-aminooctadec-4-en-1-ol**

Yield (62%);  $\delta_{\text{H}}$  (400 MHz,  $\text{CDCl}_3$ ) 5.51 (1H, dt,  $J$  13.9, 6.5, 5-*H*), 5.38–5.30 (1H, m, 4-*H*), 3.60 (1H, d,  $J$  8.2, 1-*HH*), 3.33 (1H, dd,  $J$  10.2, 8.2, 1-*HH*), 2.97–2.83 (1H, m, 2-*H*), 2.34 (3H, br s,  $\text{NH}_2$  and OH), 2.20–2.10 (1H, m, 3-*H}\_2), 1.99 (2H, dd,  $J$  13.5, 6.6, 6-*H}\_2), 1.37–1.20 (22H, m, 7-*H}\_2* to 17-*H}\_2), 0.87 (3H, t,  $J$  6.5, 18-*H}\_3*);  $m/z$  ( $\text{ES}^+$ ) 284.2 [ $\text{M}+\text{H}$ ] $^+$ ; HRMS ( $\text{ES}^+$ ) found [ $\text{M}+\text{H}$ ] $^+$  284.2947,  $\text{C}_{18}\text{H}_{38}\text{O}_1\text{N}_1$  requires  $M^+$  284.2953.***

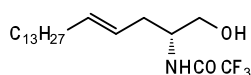

**26af (R,E)-2,2,2-trifluoro-N-(1-hydroxyoctadec-4-en-2-yl)acetamide**

Yield (38%);  $\delta_{\text{H}}$  (400 MHz,  $\text{CDCl}_3$ ) 6.56 (1H, br d,  $J$  7.0, NH), 5.56 (1H, dt,  $J$  15.0, 6.8, 5-*H*), 5.35 (1H, dt,  $J$  15.0, 7.2, 4-*H*), 4.05–3.97 (1H, m, 2-*H*), 3.73 (2H, app. d,  $J$  3.8, 1-*H}\_2), 2.39–2.25 (2H, m, 3-*H}\_2), 2.00 (2H, dd,  $J$  13.8, 6.9, 6-*H}\_2), 1.38–1.20 (22H, m, 7-*H}\_2* to 17-*H}\_2), 0.88 (3H, t,  $J$  6.9, 18-*H}\_3*);  $\delta_{\text{F}}$  (376 MHz,  $\text{CDCl}_3$ ) –75.87  $\text{CF}_3$ ;  $m/z$  ( $\text{ES}^-$ ) 378.4 [ $\text{M}-\text{H}$ ] $^-$ ; ( $\text{ES}^+$ ) 402.4 [ $\text{M}+\text{Na}$ ] $^+$ ; HRMS ( $\text{ES}^+$ ) found [ $\text{M}+\text{Na}$ ] $^+$  402.2603,  $\text{C}_{20}\text{H}_{36}\text{O}_2\text{N}_1\text{F}_3^{23}\text{Na}_1$  requires  $M^+$  402.2608.****

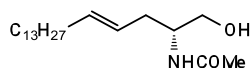

**26az (R,E)-N-(1-hydroxyoctadec-4-en-2-yl)acetamide**

Yield (88%);  $\delta_{\text{H}}$  (700 MHz,  $\text{CDCl}_3$ ) 5.82 (1H, br d,  $J$  14.8, NH), 5.51 (1H, dt,  $J$  15.0, 6.7, 5-*H*), 5.34 (1H, dt,  $J$  15.1, 7.1, 4-*H*), 3.91 (1H, tdd,  $J$  11.1, 7.2, 3.6, 2-*H*), 3.65 (1H, dd,  $J$  11.0, 3.3, 1-*HH*), 3.58 (1H, dd,  $J$  11.1, 5.7, 1-*HH*), 3.25 (1H, br s, OH), 2.27–2.22 (1H, m, 3-*HH*), 2.17 (1H, dt,  $J$  14.1, 7.1, 3-*HH*), 1.98 (5H, m, 6-*H}\_2* and  $\text{COCH}_3$ ), 1.35–1.30 (2H, m, 7-*H}\_2), 1.30–1.22 (20H, m, 8-*H}\_2* to 17-*H}\_2), 0.87 (3H, t,  $J$  7.1, 18-*H}\_3*);  $m/z$  ( $\text{ES}^-$ ) 324.4 [ $\text{M}-\text{H}$ ] $^-$ ; ( $\text{ES}^+$ ) 326.4 [ $\text{M}+\text{H}$ ] $^+$ ; HRMS ( $\text{ES}^+$ ) found [ $\text{M}+\text{H}$ ] $^+$  326.3046,  $\text{C}_{20}\text{H}_{40}\text{O}_2\text{N}_1$  requires  $M^+$  326.3035.**

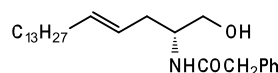

**26ay (R,E)-N-(1-hydroxyoctadec-4-en-2-yl)-2-phenylacetamide**

Yield (47%);  $\delta_H$  (700 MHz,  $CDCl_3$ ) 7.36–7.33 (2H, m, ArH), 7.30–7.28 (1H, m, ArH), 7.25–7.22 (2H, m, ArH), 5.58 (1H, br d,  $J$  5.6, NH), 5.32 (1H, dt,  $J$  14.7, 6.6, 5-H), 5.23–5.18 (1H, m, 4-H), 3.88 (1H, dtd,  $J$  13.2, 6.5, 3.8, 2-H), 3.61 (1H, dd,  $J$  11.1, 3.5, 1-HH), 3.58 (2H, s,  $PhCH_2$ ), 3.54 (1H, dd,  $J$  11.1, 6.2, 1-HH), 2.19–2.14 (1H, m, 3-HH), 2.09 – 2.04 (1H, m, 3-HH), 1.88 (2H, dd,  $J$  13.2, 6.5, 6-H<sub>2</sub>), 1.31–1.23 (22H, m, 7-H<sub>2</sub> to 17-H<sub>2</sub>), 0.88 (3H, t,  $J$  7.0, 18-H<sub>3</sub>);  $m/z$  ( $ES^-$ ) 400.5 [ $M-H$ ]<sup>-</sup>; ( $ES^+$ ) 402.4 [ $M+H$ ]<sup>+</sup>; HRMS ( $ES^+$ ) found [ $M+H$ ]<sup>+</sup> 402.3356,  $C_{26}H_{44}O_2N_1$  requires  $M^+$  402.3348.

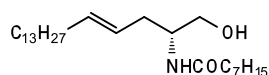

**26ax (R,E)-N-(1-hydroxyoctadec-4-en-2-yl)octanamide**

Yield (76%);  $\delta_H$  (700 MHz,  $CDCl_3$ ) 5.71 (1 H, br s, NH), 5.52 (1 H, dt,  $J$  14.8, 6.8, 5-H), 5.37–5.31 (1H, m, 4-H), 3.91 (1H, tdd,  $J$  10.8, 6.9, 3.6, 2-H), 3.65 (1H, dd,  $J$  10.9, 3.1, 1-HH), 3.58 (1H, dd,  $J$  11.0, 6.0, 1-HH), 3.28 (1H, br s, OH), 2.26 (1H, dt,  $J$  13.5, 6.6, 3-HH), 2.20–2.14 (3H, m, 3-HH and  $COCH_2$ ), 1.99 (2H, dd,  $J$  14.3, 7.1, 6-H<sub>2</sub>), 1.60 (2H, dt,  $J$  14.6, 7.4,  $COCH_2CH_2$ ), 1.35–1.22 (30H, m, 7-H<sub>2</sub> to 17-H<sub>2</sub> and 4 × aliphatic  $CH_2$ ), 0.87 (6H, t,  $J$  7.1, 18-H<sub>3</sub> and terminal octanoyl  $CH_3$ );  $m/z$  ( $ES^-$ ) 408.5 [ $M-H$ ]<sup>-</sup>; ( $ES^+$ ) 410.5 [ $M+Na$ ]<sup>+</sup>; HRMS ( $ES^+$ ) found [ $M+H$ ]<sup>+</sup> 410.3999,  $C_{26}H_{52}O_2N_1$  requires  $M^+$  410.3998.



## BIOLOGICAL METHODS

### Preparation of the Screening Compounds

All compounds were first dissolved in MeOH and 1.0 mM stock solutions were prepared in DMSO/MeOH (9:1 v/v) and 0.20 mM working solutions in DMSO/MeOH (98:2). All prepared solutions were stored at -20 °C until use.

### The Assay Protocol of the Inhibition Assays

The hydrophobic nature of most of the synthesised substrate analogues required special attention to ensure their solubility/dispersion in the reaction mixture. For each inhibition reaction, the donor substrate (PI) and test inhibitors were first dried into a reaction Eppendorf tube followed by addition of the reaction buffer, CHAPS and NBD-C<sub>6</sub>-ceramide followed by sonication for 3 minutes and incubation at 30 °C for 15 minutes. The reaction was started by the addition of *Lmj*IPCS microsomes (0.6 u). Final concentrations of the test compound, PI and NBD-C<sub>6</sub>-ceramide were 20 μM, 100 μM and 5 μM respectively. After 15 minutes the reaction was quenched by the addition of MeOH and the product sphingolipids separated from unreacted NBD-C<sub>6</sub>-ceramide by ion exchange chromatography.<sup>19</sup> The amount of fluorescent product was then quantified using a fluorescence plate reader. All reactions were done in triplicates with the inhibitory effect quantified by the change in the formation of the labelled product, NBD-C<sub>6</sub>-IPC.

### Mass Spectrometry Analyses

Analyses were performed on an LTQFT (ThermoFinnigan Corp); an FTICR MS instrument equipped with a 7.0 T magnet. A different assay protocol<sup>20</sup> was deployed to minimise CHAPS content using PI-depleted CHAPS-washed microsomal membranes.<sup>21</sup> The organic extracts were dried and re-suspended in chloroform and introduced into the electrospray ion source by direct infusion from a syringe at a flow rate 3 μl/min. Positive ion measurements were made with the source voltage at 4.0 kV and negative ion measurements were made with the source voltage at 3.5 kV. The tube lens was kept at 100 V and the source temperature at 275 °C for all experiments.

The spectra are presented below in the following format,

A: Full spectrum of the organic extract of the reaction mixture.

B: Expansion of the spectra showing the formation NBD-C<sub>6</sub>-IPC.

C: Predicted response of the product that will hypothetically arise if the test compound functions as an alternative substrate.

D: Expansion of the spectra showing the region identified in C above.



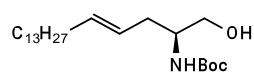

27a

### Negative Ion Spectra

A  
Full Spectrum

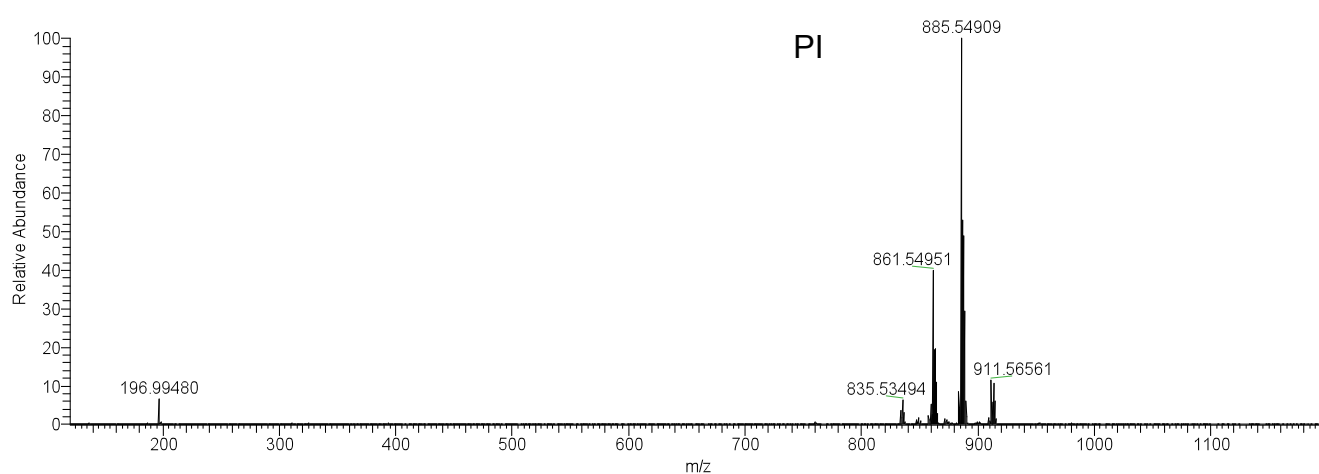

B  
NBD- $C_6$ -IPC: Detected

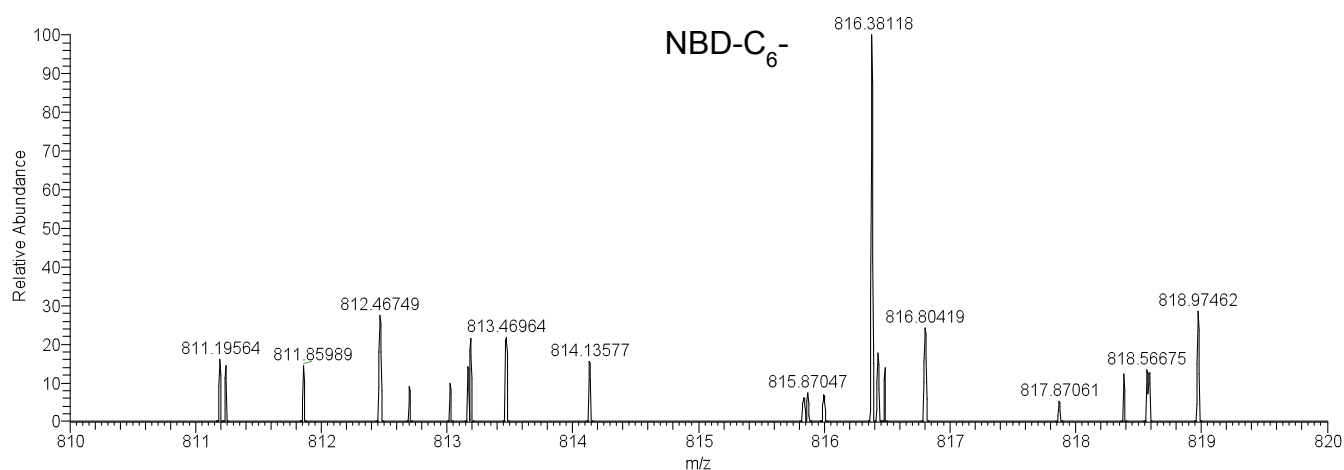



**27a**

### Negative Ion Spectra

C

Peak [M+241]<sup>-</sup> : 27a-Phosphoryl Inositol

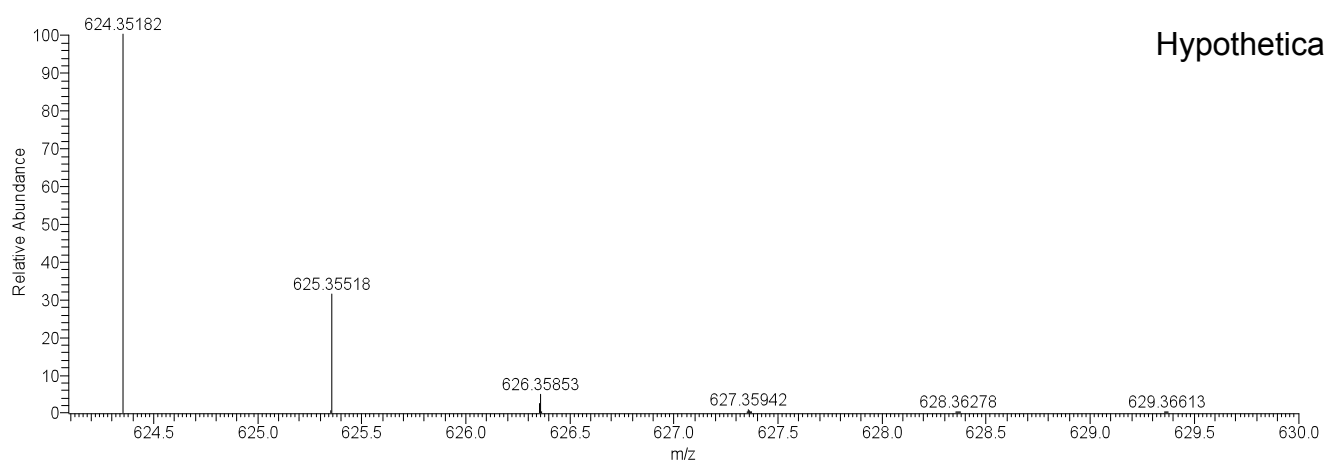

D

27a-Phosphoryl Inositol: **Not Detected**

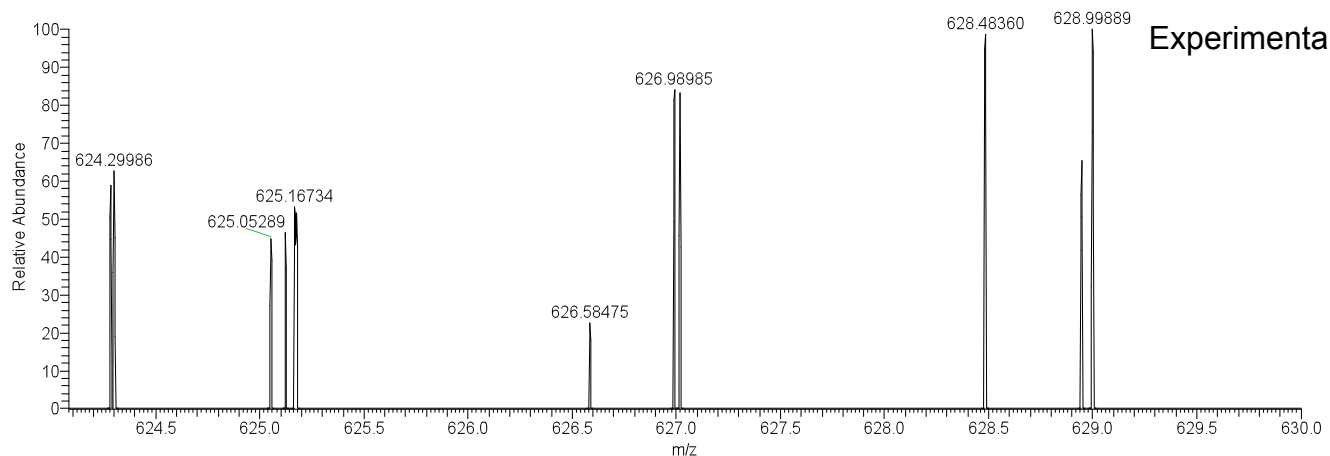

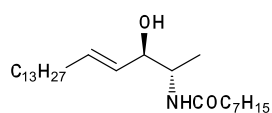

18ax

### Negative Ion Spectra

A  
Full Spectrum

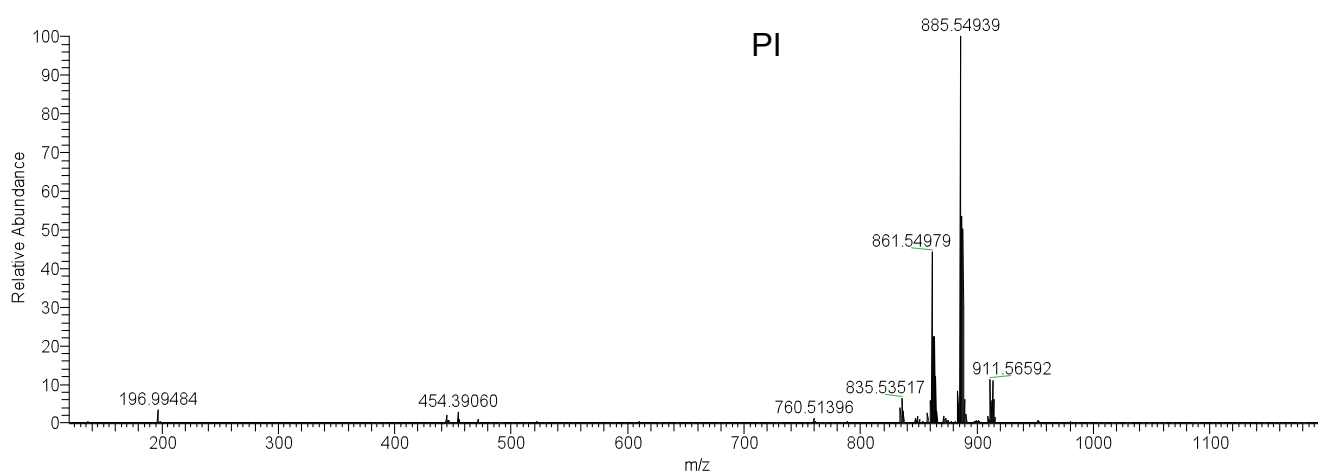

B  
NBD-C<sub>6</sub>-IPC: Detected

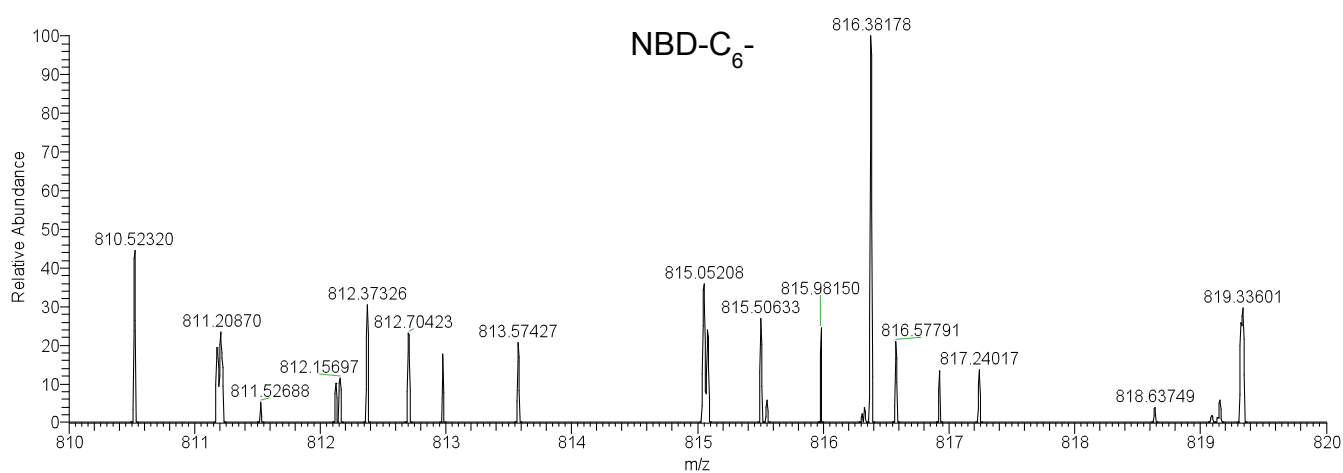



### 18ax

### Negative Ion Spectra

C

Peak [M+241]<sup>-</sup>: 18ax-Phosphoryl Inositol

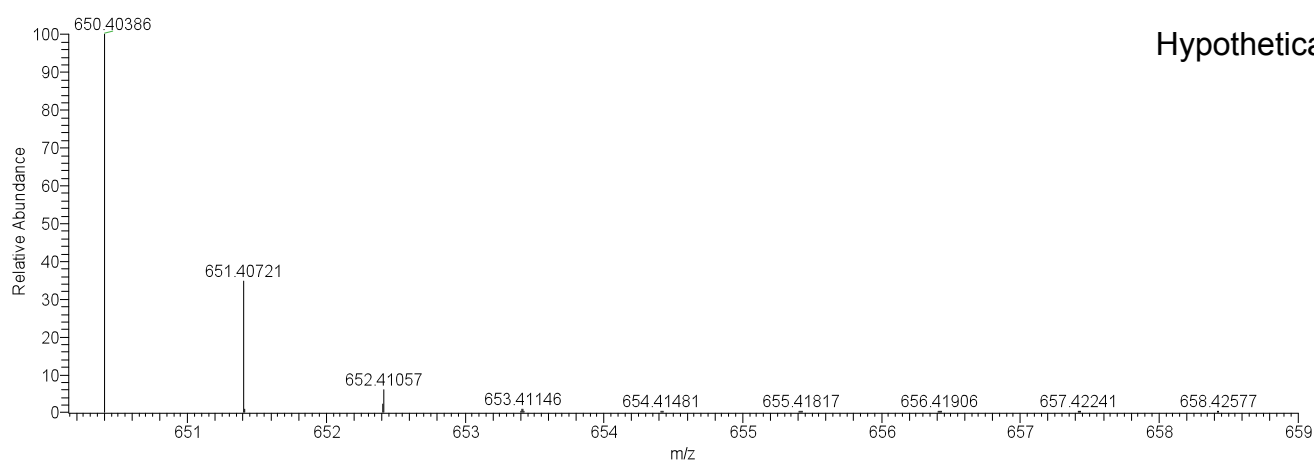

Hypothetica

D

18ax-Phosphoryl Inositol: **Not Detected**

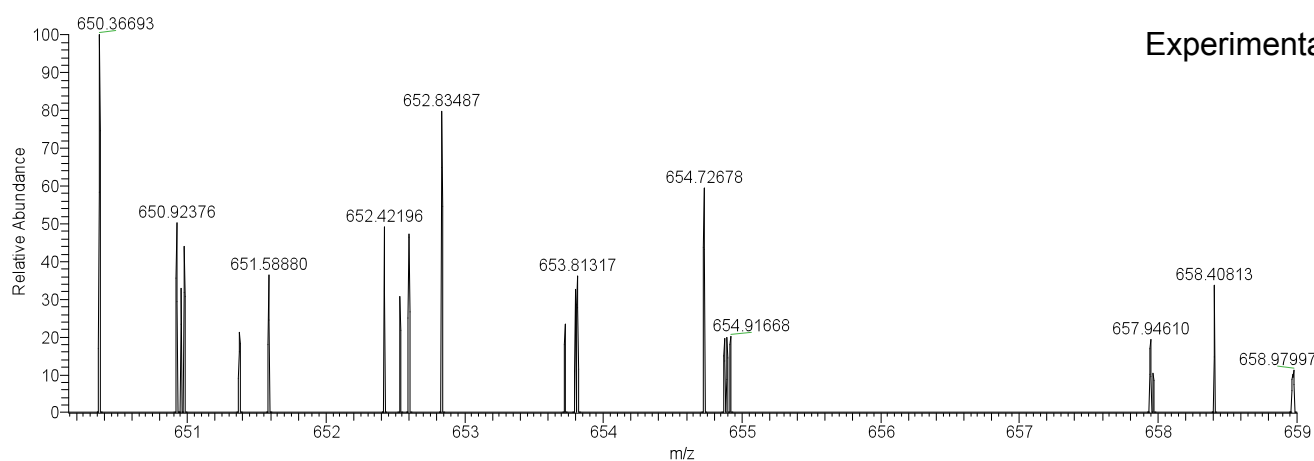

Experimenta

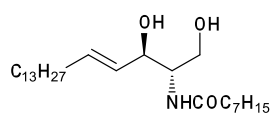

### 17ax

### Negative Ion Spectra

A  
Full Spectrum

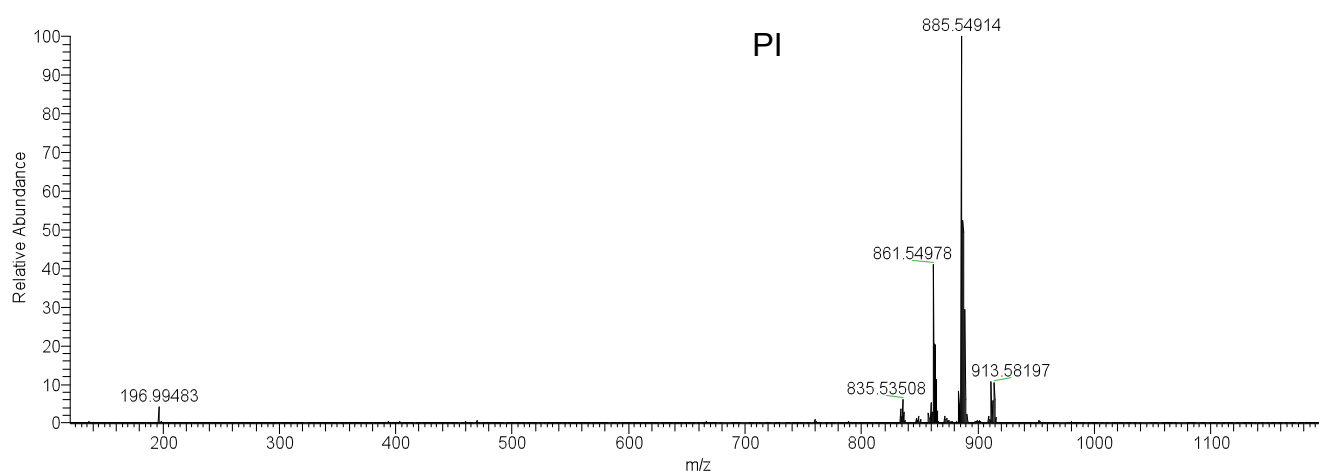

B  
NBD-C<sub>6</sub>-IPC: Detected

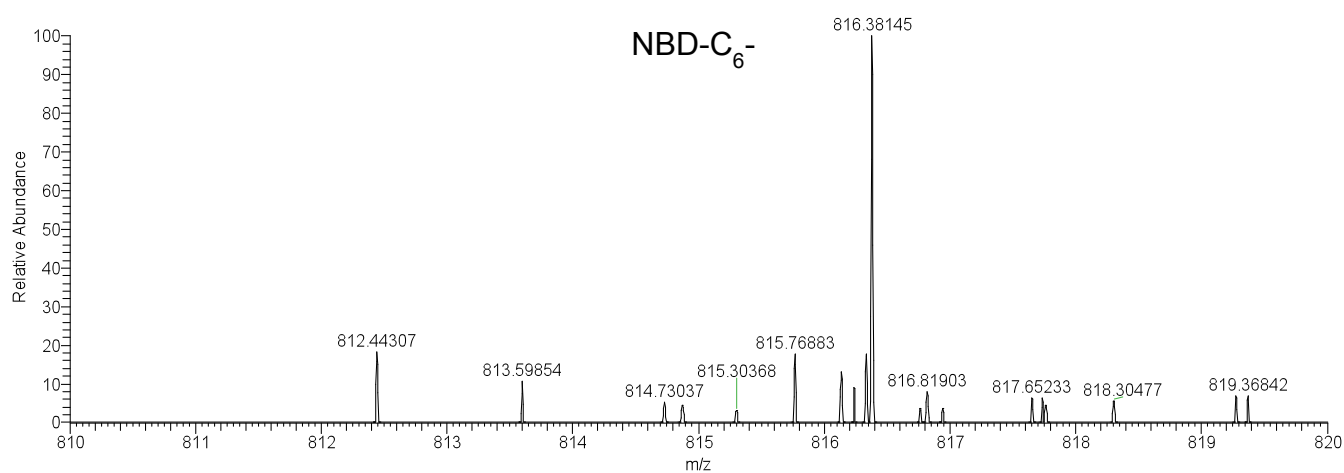



**17ax**

### Negative Ion Spectra

C

Peak [M+241]<sup>-</sup> : 17ax-Phosphoryl Inositol

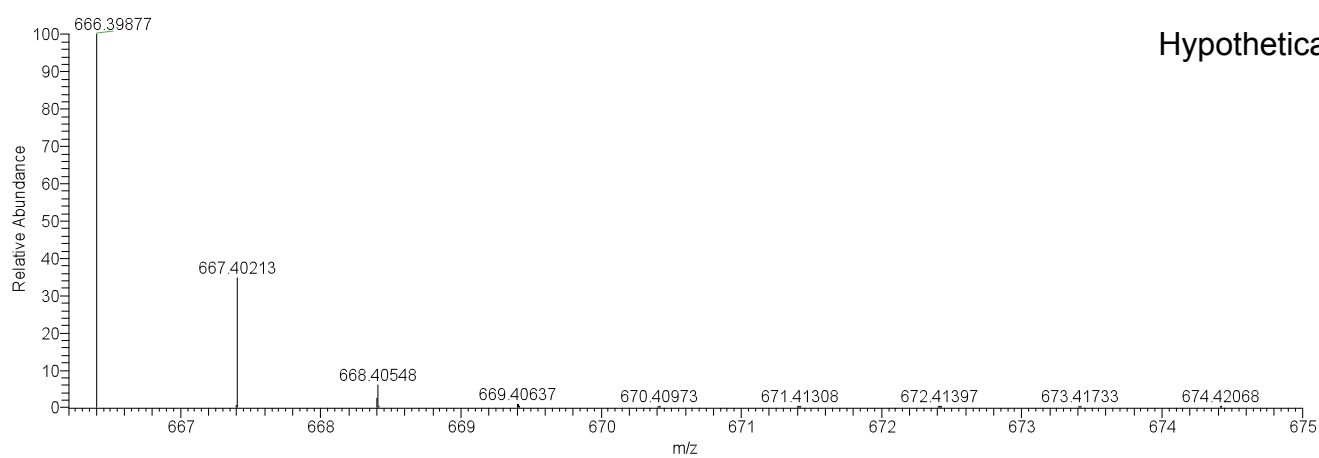

D

17ax-Phosphoryl Inositol: **Detected**

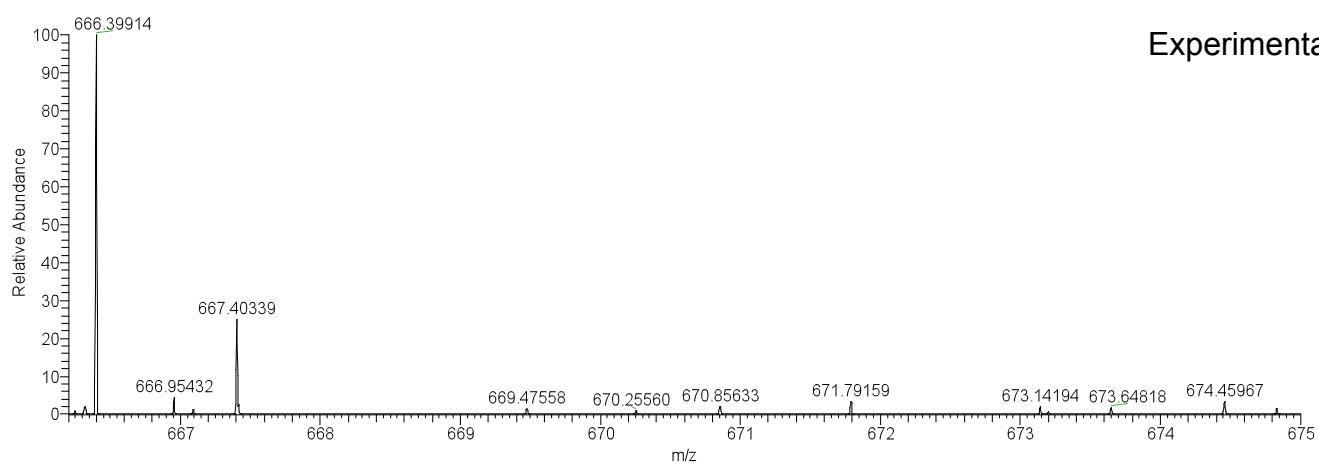

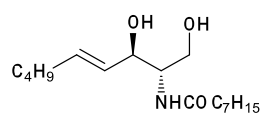

17bx

### Negative Ion Spectra

A  
Full Spectrum

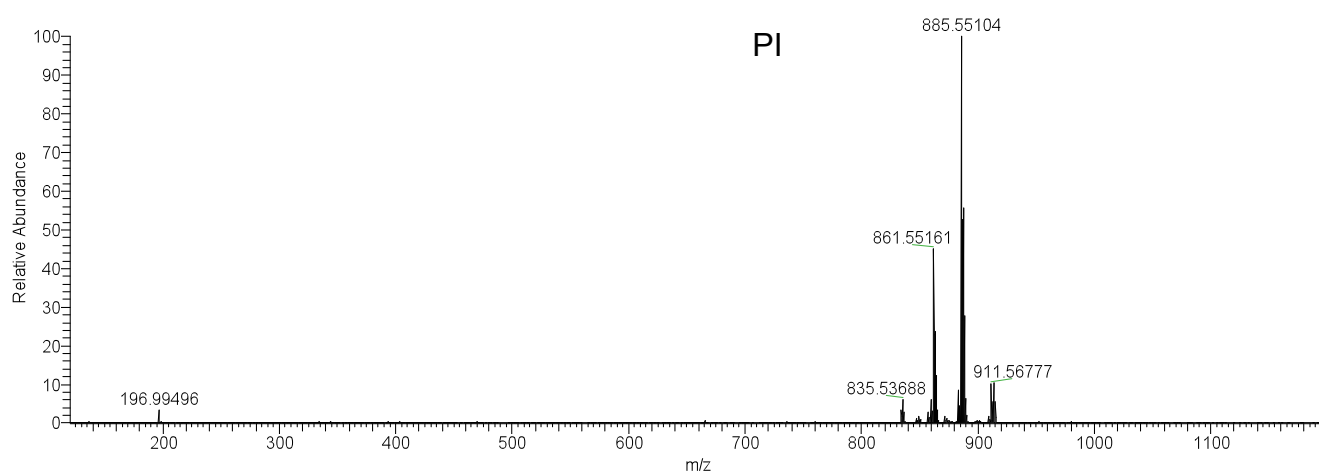

B  
NBD-C<sub>6</sub>-IPC: Detected

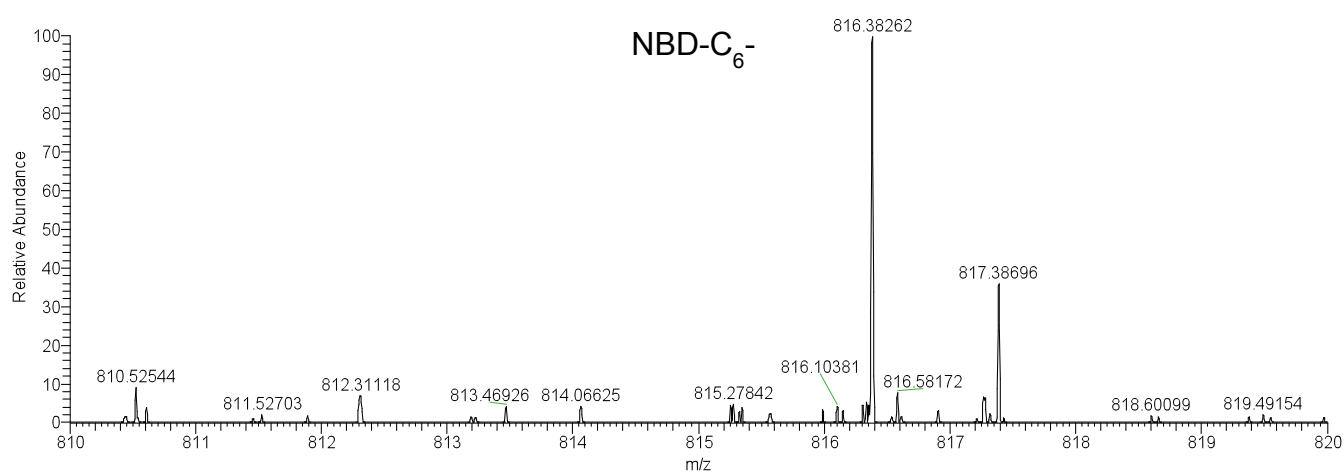



**17bx**

### Negative Ion Spectra

C

Peak  $[M+241]^-$  : 18bx-Phosphoryl Inositol

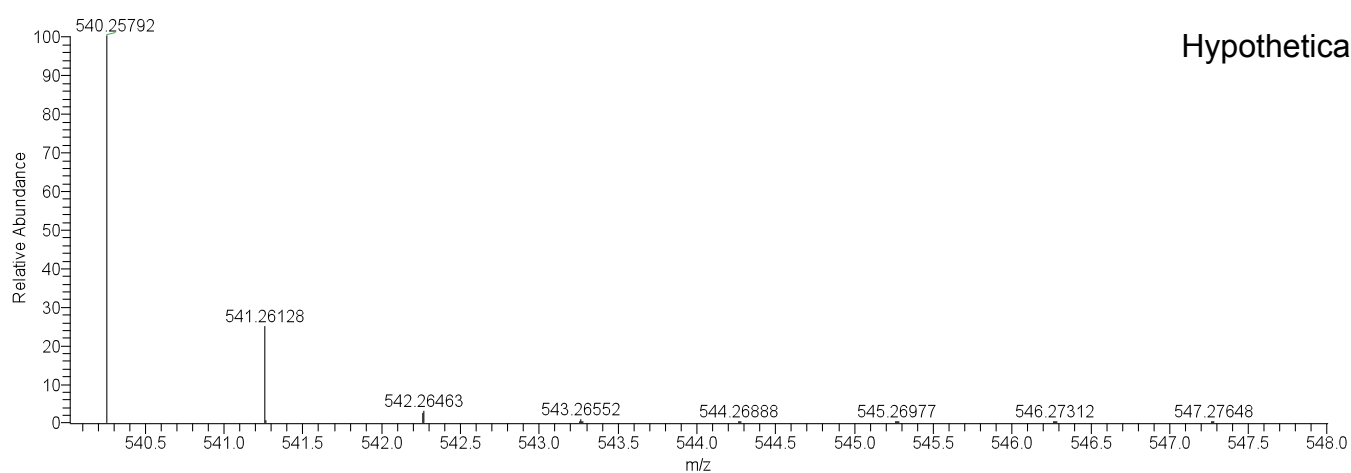

D

18bx-Phosphoryl Inositol: **Not Detected**

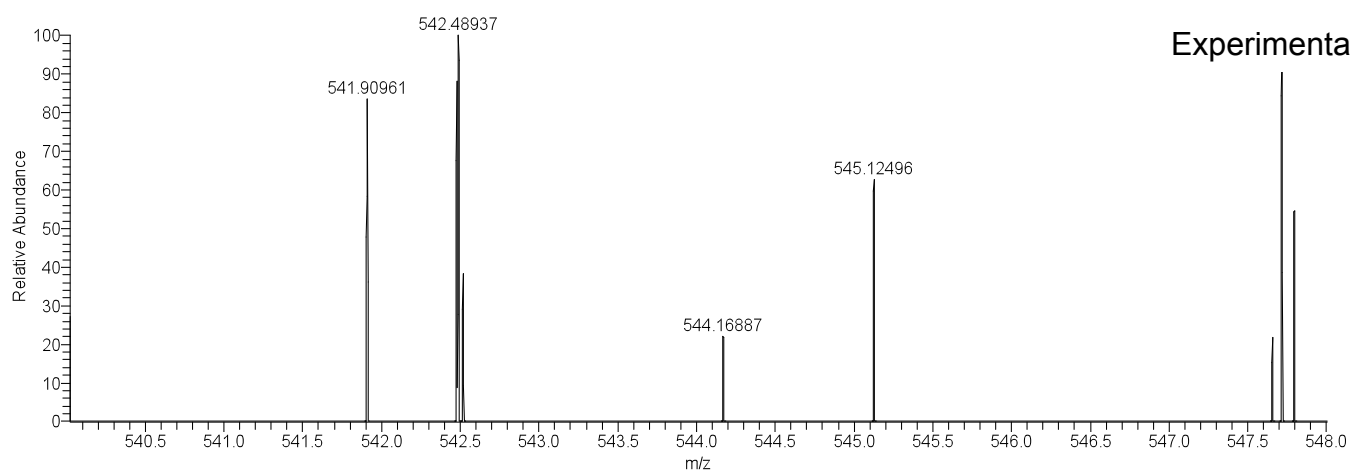



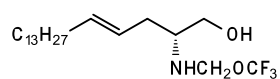

26af

### Negative Ion Spectra

A  
Full Spectrum

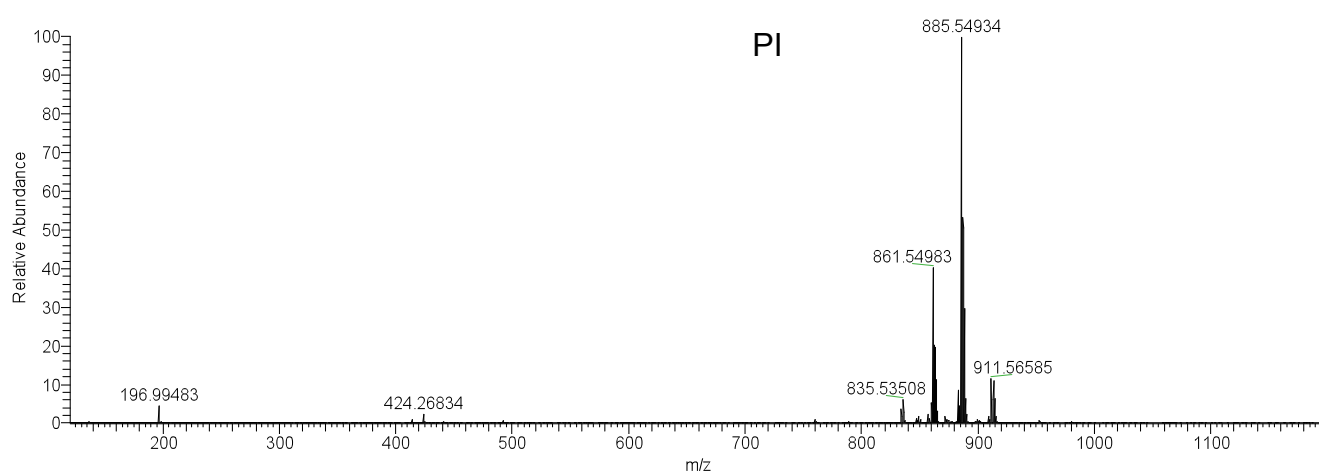

B  
NBD-C<sub>6</sub>-IPC: Detected

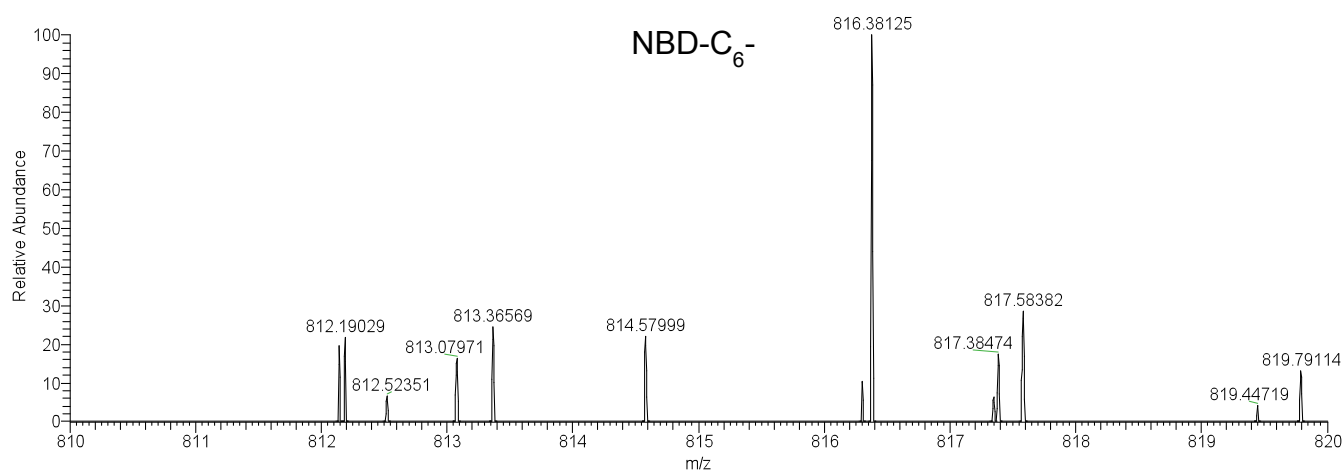



**26af**

### Negative Ion Spectra

C

Peak  $[M+241]^-$  : 18ax-Phosphoryl Inositol

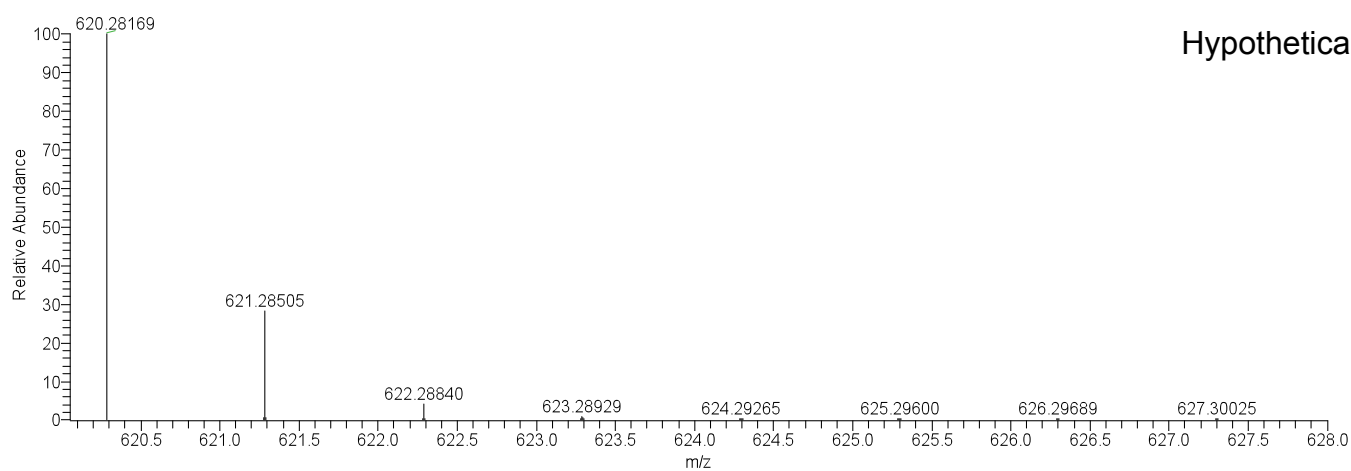

D

18ax-Phosphoryl Inositol: **Detected**

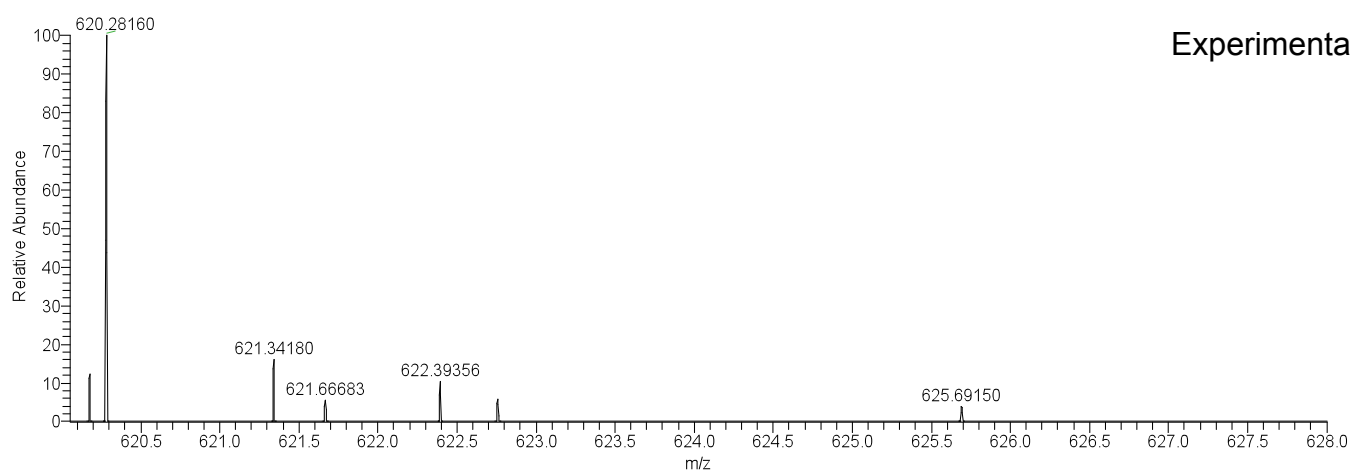

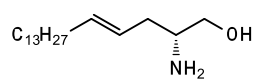

**26an**

**Negative Ion Spectra**

**A**  
Full Spectrum

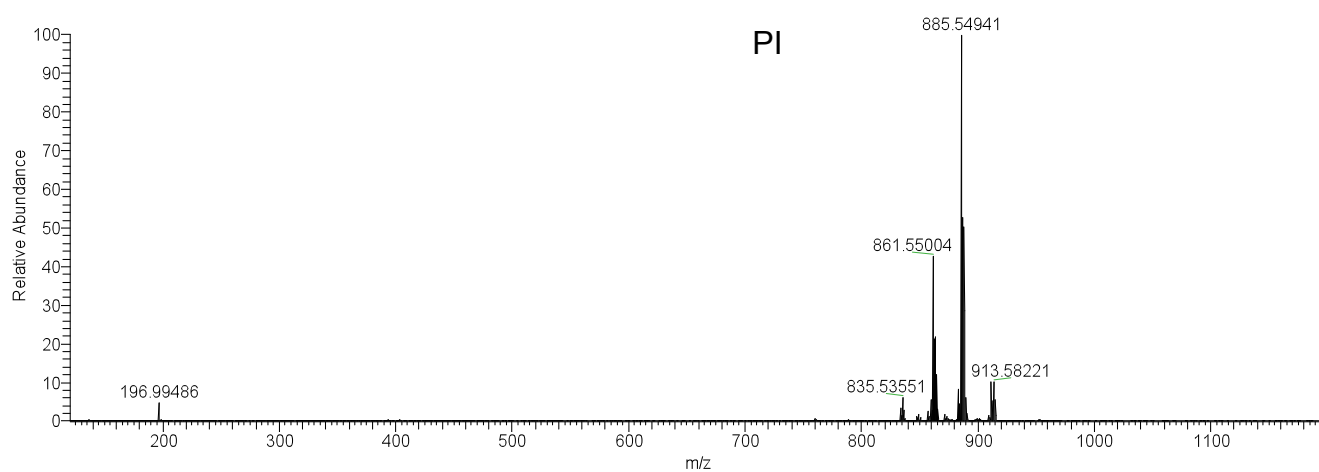

**B**  
NBD-C<sub>6</sub>-IPC: Detected

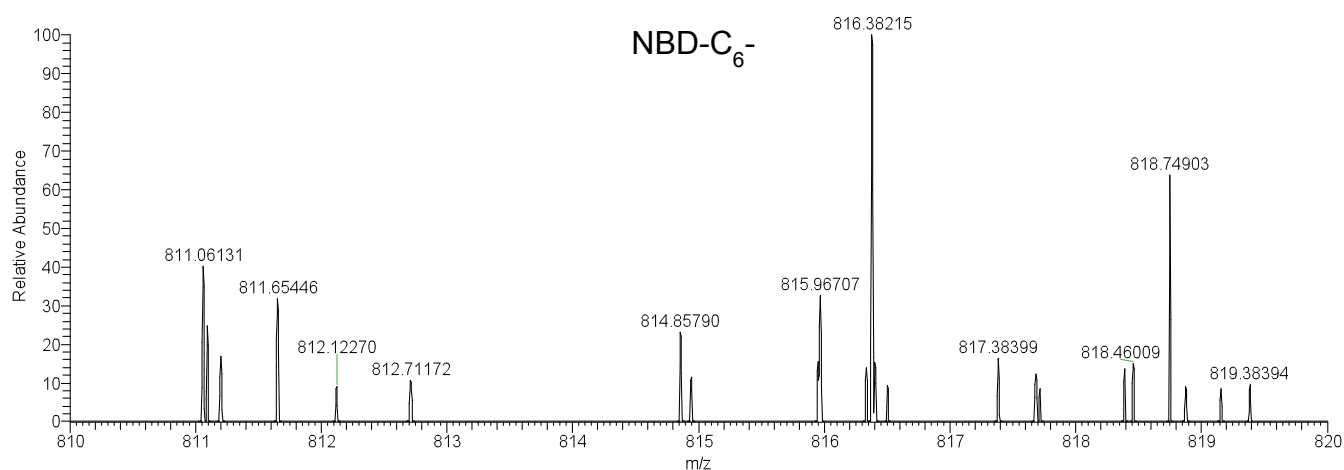



### 26an

### Negative Ion Spectra

C

Peak [M+241]<sup>-</sup> : 26an-Phosphoryl Inositol

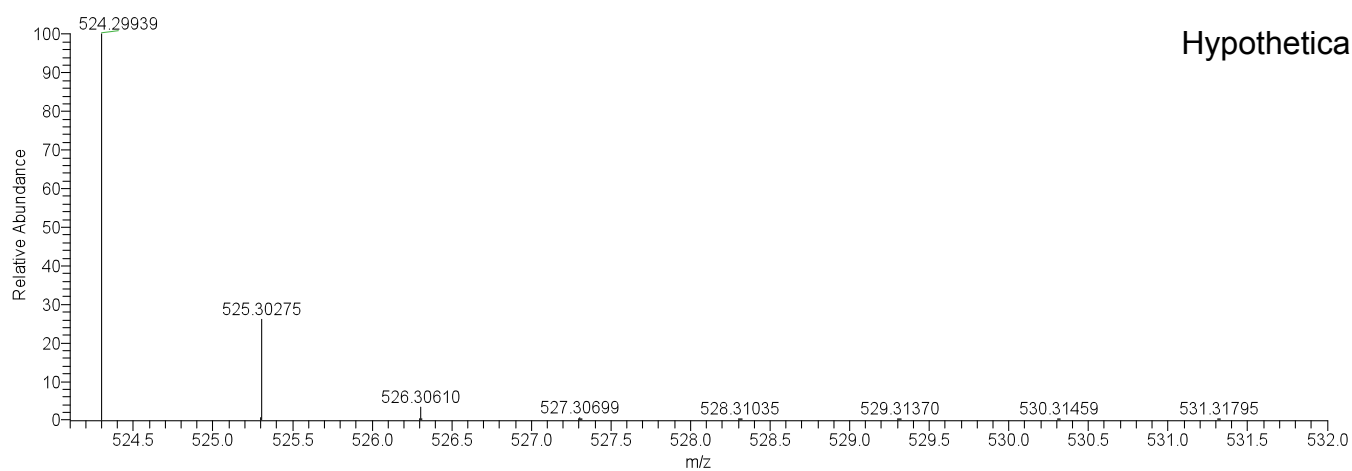

D

26an-Phosphoryl Inositol: **Not Detected**

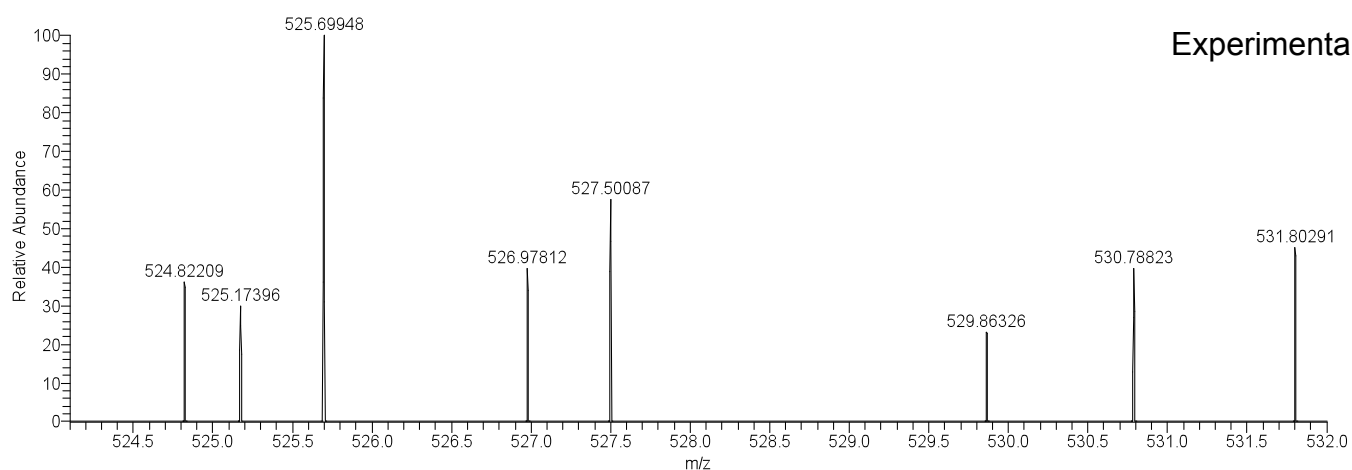

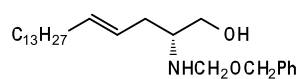

26ay

### Negative Ion Spectra

A  
Full Spectrum

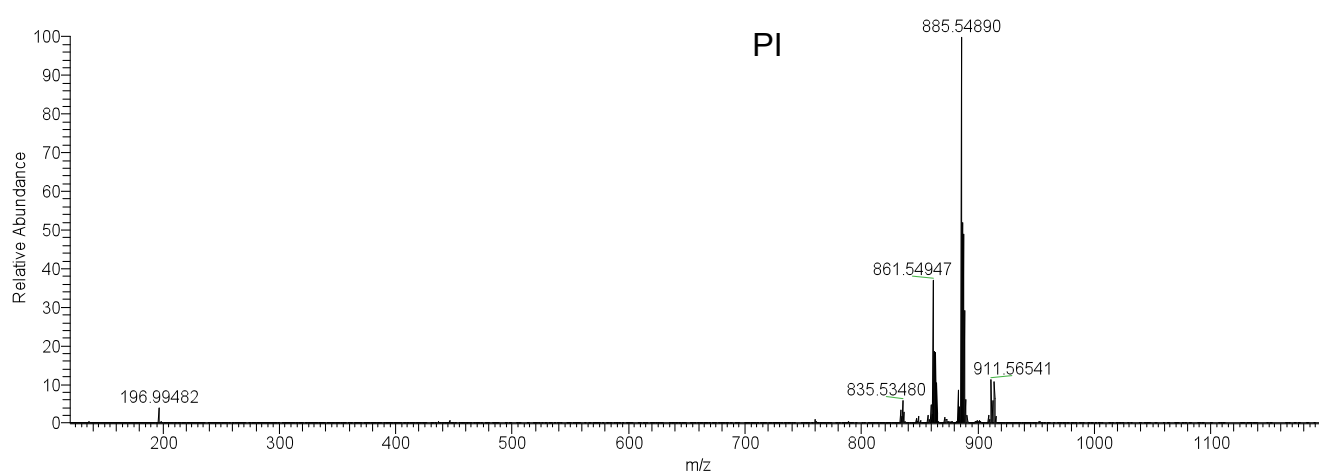

B  
NBD-C<sub>6</sub>-IPC: Detected

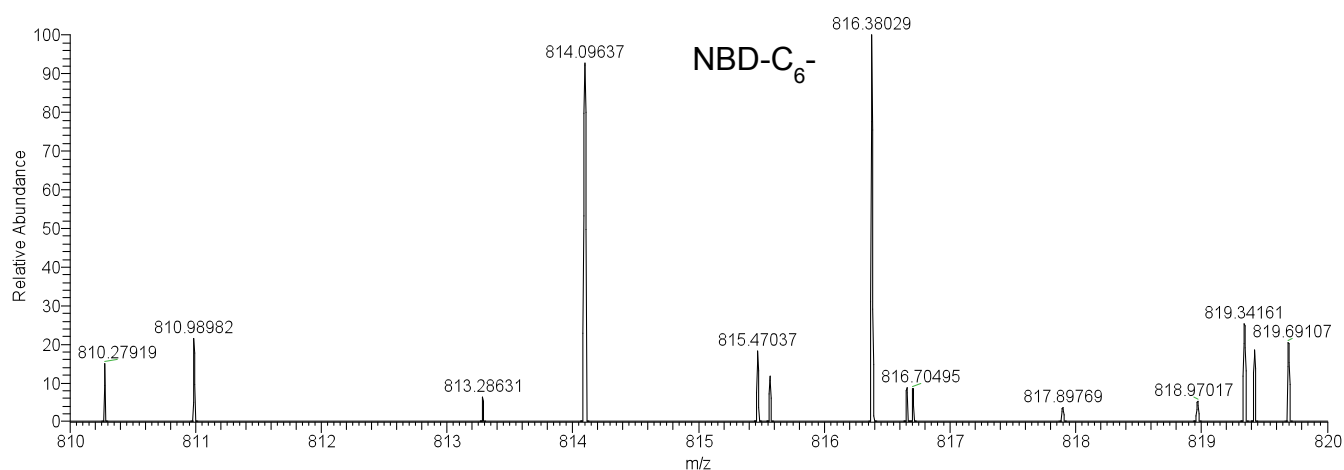



**26ay**

### Negative Ion Spectra

C

Peak  $[M+241]$  : 26ay-Phosphoryl Inositol

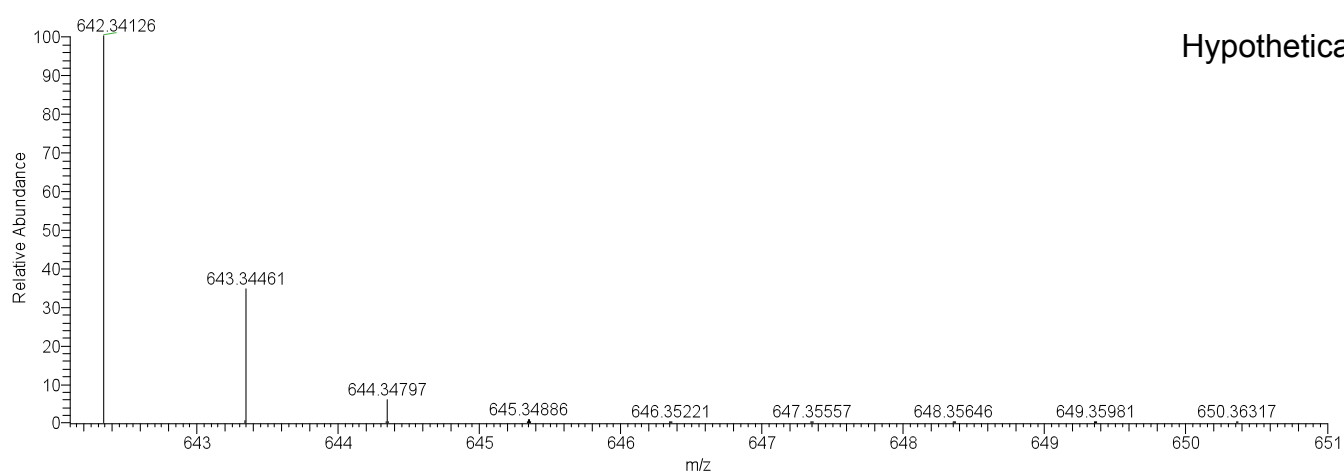

Hypothetica

D

26ay-Phosphoryl Inositol: **Not Detected**

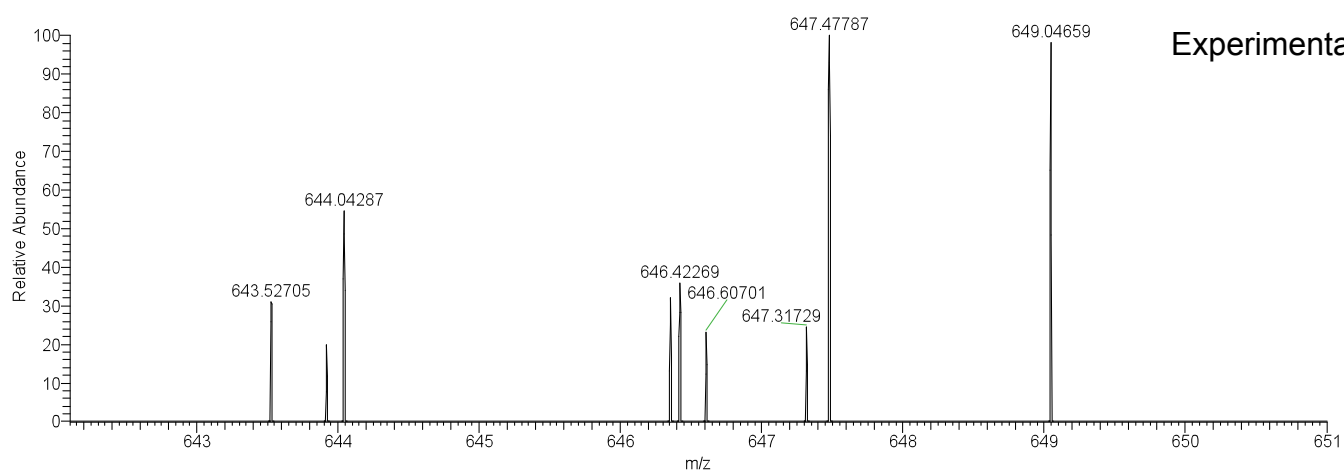

Experimenta

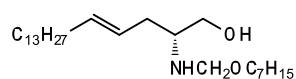

**26ax**

### Negative Ion Spectra

A  
Full Spectrum

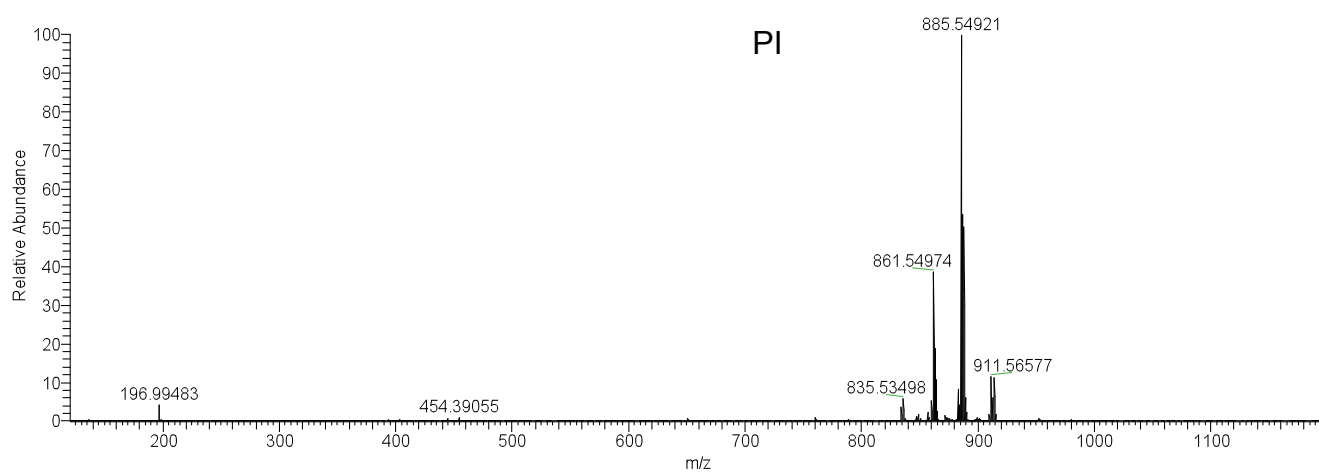

B  
NBD-C<sub>6</sub>-IPC: Detected

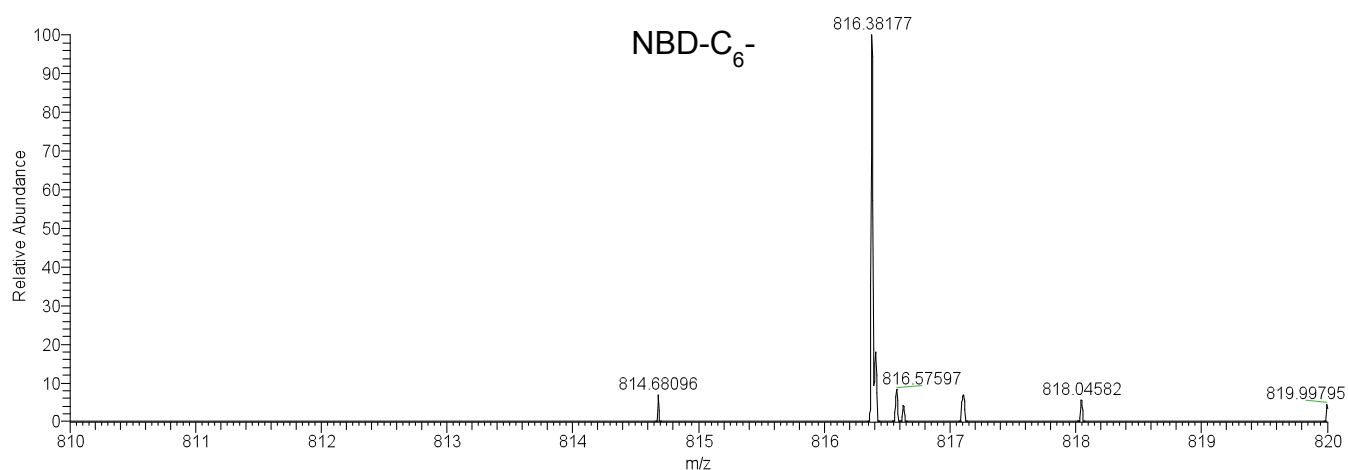



**26ax**

### Negative Ion Spectra

C

Peak [M+241]<sup>-</sup> : 26ax-Phosphoryl Inositol

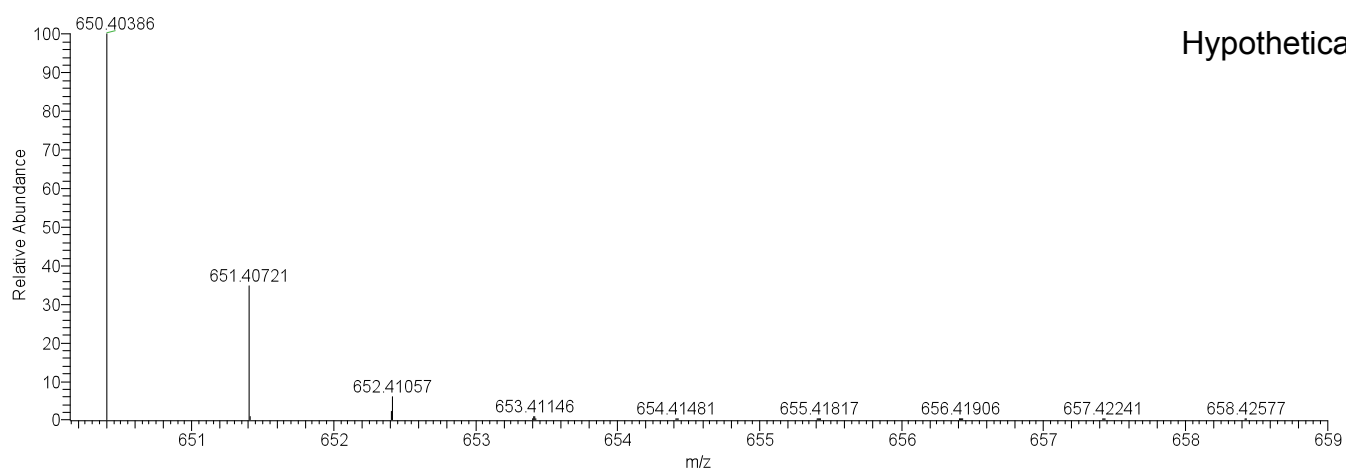

D

26ax-Phosphoryl Inositol: **Detected**

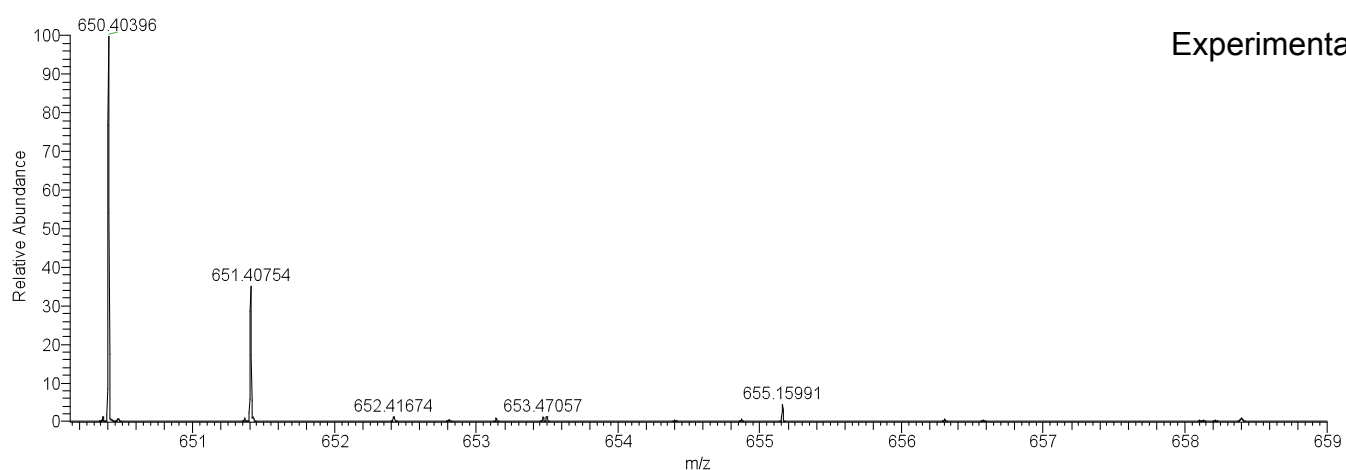



## Cytotoxicity screening

*L. major* (MHOM/IL/81/Friedlin) promastigotes parasites were maintained at 26 °C in Schneider's Drosophila media (Sigma–Aldrich) supplemented with 15% heat inactivated foetal bovine sera (Biosera).

In 96-well plates (Nunc) parasites at  $4 \times 10^5 \text{ ml}^{-1}$  were incubated with compounds in triplicate (including miltefosine (Cayman Chemical) as a positive control, and untreated parasites and media as negative controls) for 24 h before incubation with Alamar Blue (Invitrogen) for 4 h prior to assessing cell viability using a fluorescent plate reader (Biotek; 560EX nm/600EMnm).

## REFERENCES

1. L. Kosynkina, W. Wang and T. C. Liang, *Tetrahedron Lett.*, 1994, **35**, 5173-5176.
2. T. Yamamoto, H. Hasegawa, T. Hakogi and S. Katsumura, *Org. Lett.*, 2006, **8**, 5569-5572.
3. P. K. Chakravarty, W. J. Greenlee, W. H. Parsons, A. A. Patchett, P. Combs, A. Roth, R. D. Busch and T. N. Mellin, *J. Med. Chem.*, 1989, **32**, 1886-1890.
4. T. Ibuka, H. Habashita, A. Otaka, N. Fujii, Y. Oguchi, T. Uyehara and Y. Yamamoto, *J. Org. Chem.*, 1991, **56**, 4370-4382.
5. M. Toumi, F. Couty and G. Evano, *Tetrahedron Lett.*, 2008, **49**, 1175-1179.
6. M. Toumi, F. Couty and G. Evano, *Angewandte Chemie-International Edition*, 2007, **46**, 572-575.
7. R. C. So, R. Ndonye, D. P. Izmirian, S. K. Richardson, R. L. Guerrero and A. R. Howell, *J. Org. Chem.*, 2004, **69**, 3233-3235.
8. E. J. Corey, F. Xu and M. C. Noe, *Journal of the American Chemical Society*, 1997, **119**, 12414-12415.
9. B. Lygo and P. G. Wainwright, *Tetrahedron*, 1999, **55**, 6289-6300.
10. J. Aires-de-Sousa, S. Prabhakar, A. M. Lobo, A. M. Rosa, M. J. S. Gomes, M. C. Corvo, D. J. Williams and A. J. P. White, *Tetrahedron-Asymmetry*, 2002, **12**, 3349-3365.
11. M. J. Odonnell and R. L. Polt, *J. Org. Chem.*, 1982, **47**, 2663-2666.
12. R. Chinchilla, C. Nájera and F. J. Ortega, *Tetrahedron-Asymmetry*, 2006, **17**, 3423-3429.
13. T. Ohshima, T. Shibuguchi, Y. Fukuta and M. Shibasaki, *Tetrahedron*, 2004, **60**, 7743-7754.
14. T. Ohshima, V. Gnanadesikan, T. Shibuguchi, Y. Fukuta, T. Nemoto and M. Shibasaki, *J. Am. Chem. Soc.*, 2003, **125**, 11206-11207.
15. S. M. Jones, J. E. Urch, M. Kaiser, R. Brun, J. L. Harwood, C. Berry and I. H. Gilbert, *J. Med. Chem.*, 2005, **48**, 5932-5941.
16. H. Matsunaga, T. Ishizuka and T. Kunieda, *Tetrahedron*, 1997, **53**, 1275-1294.
17. B. R. Galan, K. P. Kalbarczyk, S. Szczepankiewicz, J. B. Keister and S. T. Diver, *Organic Letters*, 2007, **9**, 1203-1206.
18. T. Kawate, N. Fukuta, A. Nishida and M. Nakagawa, *Chem. Pharm. Bull.*, 1997, **45**, 2116-2118.
19. J. G. Mina, J. A. Mosely, H. Z. Ali, H. Shams-Eldin, R. T. Schwarz, P. G. Steel and P. W. Denny, *The International Journal of Biochemistry & Cell Biology*, 2010, **42**, 1553-1561.
20. J. M. Figueiredo, W. B. Dias, L. Mendonca-Previato, J. O. Previato and N. Heise, *Biochemical Journal*, 2005, **387**, 519-529.
21. P. A. Aeed, A. E. Sperry, C. L. Young, M. M. Nagiec and Å. P. Elhammer, *Biochemistry*, 2004, **43**, 8483-8493.
